# Supplementary material for: Dietary Patterns and Non-Communicable Disease Biomarkers: A Network Meta-Analysis and Nutritional Geometry Approach
Source: MDPI journal article supplement (doi:10.3390/nu15010076), 2022-12-23
Supplement: s1 [file s1]

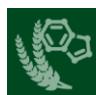

# Dietary Patterns and Non-Communicable Disease Biomarkers: A Network Meta-Analysis and Nutritional Geometry Approach

Shuang Liang <sup>1</sup>, Jovana Mijatovic <sup>1</sup>, Ang Li <sup>2</sup>, Nicholas Koemel <sup>1</sup>, Reeja Nasir <sup>1</sup>, Clémence Toniutti <sup>1</sup>, Kim Bell-Anderson <sup>3,4</sup>, Michael Skilton <sup>1,5,\*</sup> and Fiona O’Leary <sup>1,3,†</sup>

<sup>1</sup> Faculty of Medicine and Health, The University of Sydney, Sydney, NSW 2006, Australia

<sup>2</sup> Centre for Health Policy, Melbourne School of Population and Global Health, The University of Melbourne, Melbourne, VIC 3010, Australia

<sup>3</sup> The Charles Perkins Centre, The University of Sydney, Sydney, NSW 2006, Australia

<sup>4</sup> Faculty of Science, The University of Sydney, Sydney, NSW 2006, Australia

<sup>5</sup> Sydney Institute for Women, Children and Their Families, Sydney Local Health District, Sydney, NSW 2050, Australia

\* Correspondence: michael.skilton@sydney.edu.au; Tel.: +61-2-8627-1916

† These authors contributed equally to this work.

| Content                                                                                                          | Page    |
|------------------------------------------------------------------------------------------------------------------|---------|
| Supplementary Table S1: PRISMA NMA checklist                                                                     | 2-5     |
| Supplementary Document S1: Search strategy                                                                       | 6-7     |
| Supplementary Figures S1-S3: Network diagrams                                                                    | 8-12    |
| Supplementary Table S2: Characteristics of studies included for quantitative syntheses                           | 13-28   |
| Supplementary Table S3: Study-outcomes excluded from quantitative synthesis                                      | 29-31   |
| Supplementary Table S4: Risk of bias for individual studies                                                      | 32-39   |
| Supplementary Tables S5-S14: League tables                                                                       | 40-49   |
| Supplementary Figures S4-S14: Box plots                                                                          | 50-60   |
| Supplementary Figures S15-S25: Rankograms                                                                        | 61-71   |
| Supplementary Tables S15-S24: Loop-specific approach                                                             | 72-81   |
| Supplementary Tables S25-S35: Side-splitting approach                                                            | 82-92   |
| Supplementary Tables S36-S62: Sensitivity analysis for Network Meta-Analysis                                     | 93-119  |
| Supplementary Figures S26-S36: Comparison-adjusted funnel plots                                                  | 120-130 |
| Supplementary Tables S63-S67: The Confidence in Network Meta-Analysis (CINeMA) framework ratings for credibility | 131-143 |
| Supplementary Figures S37-S39: Right-angle Mixture Triangles                                                     | 144-146 |
| Supplementary Table S68: Coefficients for Right-angle Mixture Triangles                                          | 147     |
| eReferences                                                                                                      | 148-151 |

**Supplementary Table S1: PRISMA NMA Checklist of Items to Include When Reporting A Systematic Review Involving a Network Meta-analysis**

| Section/Topic             | Item # | Checklist Item                                                                                                                                                                                                                                                                                                                                                                                                                                                                                                                                                                                                                                                                                                                                                                          | Reported on Page #         |
|---------------------------|--------|-----------------------------------------------------------------------------------------------------------------------------------------------------------------------------------------------------------------------------------------------------------------------------------------------------------------------------------------------------------------------------------------------------------------------------------------------------------------------------------------------------------------------------------------------------------------------------------------------------------------------------------------------------------------------------------------------------------------------------------------------------------------------------------------|----------------------------|
| <b>TITLE</b>              |        |                                                                                                                                                                                                                                                                                                                                                                                                                                                                                                                                                                                                                                                                                                                                                                                         |                            |
| Title                     | 1      | Identify the report as a systematic review <i>incorporating a network meta-analysis (or related form of meta-analysis)</i> .                                                                                                                                                                                                                                                                                                                                                                                                                                                                                                                                                                                                                                                            | <b>1</b>                   |
| <b>ABSTRACT</b>           |        |                                                                                                                                                                                                                                                                                                                                                                                                                                                                                                                                                                                                                                                                                                                                                                                         |                            |
| Structured summary        | 2      | Provide a structured summary including, as applicable:<br><b>Background:</b> main objectives<br><b>Methods:</b> data sources; study eligibility criteria, participants, and interventions; study appraisal; and <i>synthesis methods, such as network meta-analysis</i> .<br><b>Results:</b> number of studies and participants identified; summary estimates with corresponding confidence/credible intervals; <i>treatment rankings may also be discussed. Authors may choose to summarize pairwise comparisons against a chosen treatment included in their analyses for brevity.</i><br><b>Discussion/Conclusions:</b> limitations; conclusions and implications of findings.<br><b>Other:</b> primary source of funding; systematic review registration number with registry name. | 1                          |
| <b>INTRODUCTION</b>       |        |                                                                                                                                                                                                                                                                                                                                                                                                                                                                                                                                                                                                                                                                                                                                                                                         |                            |
| Rationale                 | 3      | Describe the rationale for the review in the context of what is already known, <i>including mention of why a network meta-analysis has been conducted</i> .                                                                                                                                                                                                                                                                                                                                                                                                                                                                                                                                                                                                                             | <b>1-2</b>                 |
| Objectives                | 4      | Provide an explicit statement of questions being addressed, with reference to participants, interventions, comparisons, outcomes, and study design (PICOS).                                                                                                                                                                                                                                                                                                                                                                                                                                                                                                                                                                                                                             | 2                          |
| <b>METHODS</b>            |        |                                                                                                                                                                                                                                                                                                                                                                                                                                                                                                                                                                                                                                                                                                                                                                                         |                            |
| Protocol and registration | 5      | Indicate whether a review protocol exists and if and where it can be accessed (e.g., Web address); and, if available, provide registration information, including registration number.                                                                                                                                                                                                                                                                                                                                                                                                                                                                                                                                                                                                  | PROSPERO<br>CRD42019129839 |
| Eligibility criteria      | 6      | Specify study characteristics (e.g., PICOS, length of follow-up) and report characteristics (e.g., years considered, language, publication status) used as criteria for eligibility, giving rationale. <i>Clearly describe eligible treatments included in the treatment network, and note whether any</i>                                                                                                                                                                                                                                                                                                                                                                                                                                                                              | <b>4</b>                   |

|                                        |           |                                                                                                                                                                                                                                                                                                                                                                                                                        |                           |
|----------------------------------------|-----------|------------------------------------------------------------------------------------------------------------------------------------------------------------------------------------------------------------------------------------------------------------------------------------------------------------------------------------------------------------------------------------------------------------------------|---------------------------|
|                                        |           | <i>have been clustered or merged into the same node (with justification).</i>                                                                                                                                                                                                                                                                                                                                          |                           |
| Information sources                    | 7         | Describe all information sources (e.g., databases with dates of coverage, contact with study authors to identify additional studies) in the search and date last searched.                                                                                                                                                                                                                                             | 3                         |
| Search                                 | 8         | Present full electronic search strategy for at least one database, including any limits used, such that it could be repeated.                                                                                                                                                                                                                                                                                          | Supplementary Document S1 |
| Study selection                        | 9         | State the process for selecting studies (i.e., screening, eligibility, included in systematic review, and, if applicable, included in the meta-analysis).                                                                                                                                                                                                                                                              | 4                         |
| Data collection process                | 10        | Describe method of data extraction from reports (e.g., piloted forms, independently, in duplicate) and any processes for obtaining and confirming data from investigators.                                                                                                                                                                                                                                             | 4                         |
| Data items                             | 11        | List and define all variables for which data were sought (e.g., PICOS, funding sources) and any assumptions and simplifications made.                                                                                                                                                                                                                                                                                  | 4                         |
| <b>Geometry of the network</b>         | <b>S1</b> | Describe methods used to explore the geometry of the treatment network under study and potential biases related to it. This should include how the evidence base has been graphically summarized for presentation, and what characteristics were compiled and used to describe the evidence base to readers.                                                                                                           | <b>6-7</b>                |
| Risk of bias within individual studies | 12        | Describe methods used for assessing risk of bias of individual studies (including specification of whether this was done at the study or outcome level), and how this information is to be used in any data synthesis.                                                                                                                                                                                                 | 4-5                       |
| Summary measures                       | 13        | State the principal summary measures (e.g., risk ratio, difference in means). <i>Also describe the use of additional summary measures assessed, such as treatment rankings and surface under the cumulative ranking curve (SUCRA) values, as well as modified approaches used to present summary findings from meta-analyses.</i>                                                                                      | 5                         |
| Planned methods of analysis            | 14        | Describe the methods of handling data and combining results of studies for each network meta-analysis. This should include, but not be limited to: <ul style="list-style-type: none"> <li>• <i>Handling of multi-arm trials;</i></li> <li>• <i>Selection of variance structure;</i></li> <li>• <i>Selection of prior distributions in Bayesian analyses; and</i></li> <li>• <i>Assessment of model fit.</i></li> </ul> | 4-6                       |
| <b>Assessment of Inconsistency</b>     | <b>S2</b> | Describe the statistical methods used to evaluate the agreement of direct and indirect evidence in the treatment network(s) studied. Describe efforts taken to address its presence when found.                                                                                                                                                                                                                        | 5                         |

|                                          |           |                                                                                                                                                                                                                                                                                                                                                                                                                                                   |                                                                                    |
|------------------------------------------|-----------|---------------------------------------------------------------------------------------------------------------------------------------------------------------------------------------------------------------------------------------------------------------------------------------------------------------------------------------------------------------------------------------------------------------------------------------------------|------------------------------------------------------------------------------------|
| Risk of bias across studies              | 15        | Specify any assessment of risk of bias that may affect the cumulative evidence (e.g., publication bias, selective reporting within studies).                                                                                                                                                                                                                                                                                                      | 4-5                                                                                |
| Additional analyses                      | 16        | Describe methods of additional analyses if done, indicating which were pre-specified. This may include, but not be limited to, the following: <ul style="list-style-type: none"> <li>• Sensitivity or subgroup analyses;</li> <li>• Meta-regression analyses;</li> <li>• <i>Alternative formulations of the treatment network; and</i></li> <li>• <i>Use of alternative prior distributions for Bayesian analyses (if applicable).</i></li> </ul> | 5-6                                                                                |
| <b>RESULTS†</b>                          |           |                                                                                                                                                                                                                                                                                                                                                                                                                                                   |                                                                                    |
| Study selection                          | 17        | Give numbers of studies screened, assessed for eligibility, and included in the review, with reasons for exclusions at each stage, ideally with a flow diagram.                                                                                                                                                                                                                                                                                   | 6<br>Figure 1                                                                      |
| <b>Presentation of network structure</b> | <b>S3</b> | Provide a network graph of the included studies to enable visualization of the geometry of the treatment network.                                                                                                                                                                                                                                                                                                                                 | <b>Figure 2</b><br><b>Supplementary Figures S1-S3, 6-7</b>                         |
| <b>Summary of network geometry</b>       | <b>S4</b> | Provide a brief overview of characteristics of the treatment network. This may include commentary on the abundance of trials and randomized patients for the different interventions and pairwise comparisons in the network, gaps of evidence in the treatment network, and potential biases reflected by the network structure.                                                                                                                 |                                                                                    |
| Study characteristics                    | 18        | For each study, present characteristics for which data were extracted (e.g., study size, PICOS, follow-up period) and provide the citations.                                                                                                                                                                                                                                                                                                      | Supplementary Table S2<br>Supplementary Table S3                                   |
| Risk of bias within studies              | 19        | Present data on risk of bias of each study and, if available, any outcome level assessment.                                                                                                                                                                                                                                                                                                                                                       | 6<br>Supplementary Table S4                                                        |
| Results of individual studies            | 20        | For all outcomes considered (benefits or harms), present, for each study: 1) simple summary data for each intervention group, and 2) effect estimates and confidence intervals. <i>Modified approaches may be needed to deal with information from larger networks.</i>                                                                                                                                                                           | Supplementary Table S3                                                             |
| Synthesis of results                     | 21        | Present results of each meta-analysis done, including confidence/credible intervals. <i>In larger networks, authors may focus on comparisons versus a particular comparator (e.g. placebo or standard care), with full findings presented in an appendix. League tables and forest plots may be considered to summarize pairwise comparisons. If additional summary measures were explored</i>                                                    | <b>6-7, 10-11</b><br><b>Table 1, Table 2</b><br><b>Supplementary Tables S5-S14</b> |

|                                      |           |                                                                                                                                                                                                                                                                                                                                                                                                                                |                                                                                                                                   |
|--------------------------------------|-----------|--------------------------------------------------------------------------------------------------------------------------------------------------------------------------------------------------------------------------------------------------------------------------------------------------------------------------------------------------------------------------------------------------------------------------------|-----------------------------------------------------------------------------------------------------------------------------------|
|                                      |           | (such as treatment rankings), these should also be presented.                                                                                                                                                                                                                                                                                                                                                                  |                                                                                                                                   |
| <b>Exploration for inconsistency</b> | <b>S5</b> | Describe results from investigations of inconsistency. This may include such information as measures of model fit to compare consistency and inconsistency models, <i>P</i> values from statistical tests, or summary of inconsistency estimates from different parts of the treatment network.                                                                                                                                | <b>11</b><br><br><i>Supplementary Tables S15-S35</i>                                                                              |
| Risk of bias across studies          | 22        | Present results of any assessment of risk of bias across studies for the evidence base being studied.                                                                                                                                                                                                                                                                                                                          | 11<br>Supplementary Tables S52-S56                                                                                                |
| Results of additional analyses       | 23        | Give results of additional analyses, if done (e.g., sensitivity or subgroup analyses, meta-regression analyses, <i>alternative network geometries studied, alternative choice of prior distributions for Bayesian analyses</i> , and so forth).                                                                                                                                                                                | <b>11-12</b><br><br><i>Supplementary Tables S36-S62</i><br><i>Supplementary Figures S37-S39</i><br><i>Supplementary Table S68</i> |
| <b>DISCUSSION</b>                    |           |                                                                                                                                                                                                                                                                                                                                                                                                                                |                                                                                                                                   |
| Summary of evidence                  | 24        | Summarize the main findings, including the strength of evidence for each main outcome; consider their relevance to key groups (e.g., healthcare providers, users, and policy-makers).                                                                                                                                                                                                                                          | 13-14                                                                                                                             |
| Limitations                          | 25        | Discuss limitations at study and outcome level (e.g., risk of bias), and at review level (e.g., incomplete retrieval of identified research, reporting bias). <i>Comment on the validity of the assumptions, such as transitivity and consistency. Comment on any concerns regarding network geometry (e.g., avoidance of certain comparisons).</i>                                                                            | 14-15                                                                                                                             |
| Conclusions                          | 26        | Provide a general interpretation of the results in the context of other evidence, and implications for future research.                                                                                                                                                                                                                                                                                                        | 15                                                                                                                                |
| <b>FUNDING</b>                       |           |                                                                                                                                                                                                                                                                                                                                                                                                                                | 17                                                                                                                                |
| Funding                              | 27        | Describe sources of funding for the systematic review and other support (e.g., supply of data); role of funders for the systematic review. This should also include information regarding whether funding has been received from manufacturers of treatments in the network and/or whether some of the authors are content experts with professional conflicts of interest that could affect use of treatments in the network. |                                                                                                                                   |

PICOS = population, intervention, comparators, outcomes, study design.

\* Text in italics indicates wording specific to reporting of network meta-analyses that has been added to guidance from the PRISMA statement.

† Authors may wish to plan for use of appendices to present all relevant information in full detail for items in this section.

## Supplementary Document S1: Search strategy

### MEDLINE search

1. Biomarkers/
2. Metabolome/
3. Metabolomics/
4. or/1-3
5. Diet, Carbohydrate Loading/
6. Diet, Atherogenic/
7. exp Diet, Carbohydrate-Restricted/
8. Diet, Fat-Restricted/
9. Diet, Gluten-Free/
10. Diet, High-Fat/
11. exp Diet, High-Protein/
12. Diet, Mediterranean/
13. Diet, Paleolithic/
14. Diet, Protein-Restricted/
15. Diet, Sodium-Restricted/
16. exp Diet, Vegetarian/
17. Diet, Western/
18. Dietary Approaches To Stop Hypertension/
19. Healthy Diet/
20. or/5-19
21. 4 and 20
22. ((Biomarker\* or biochemical marker\* or biological marker\* or metabolomic\* or metabolite\* or metabolome\*) adj5 (nutrition\* or food\* or diet\* or DASH or eating)).tw.
23. 21 or 22
24. Randomized Controlled Trials as Topic/
25. randomized controlled trial/
26. Random Allocation/
27. Double Blind Method/
28. Single Blind Method/
29. clinical trial/
30. clinical trial, phase i.pt.
31. clinical trial, phase ii.pt.
32. clinical trial, phase iii.pt.
33. clinical trial, phase iv.pt.
34. controlled clinical trial.pt.
35. randomized controlled trial.pt.
36. multicenter study.pt.
37. clinical trial.pt.
38. exp Clinical Trials as topic/
39. (clinical adj trial\$.tw.
40. ((singl\$ or doubl\$ or treb\$ or tripl\$) adj (blind\$3 or mask\$3)).tw.
41. PLACEBOS/
42. placebo\$.tw.
43. randomly allocated.tw.

44. (allocated adj2 random\$).tw.
45. or/24-44
46. case report.tw.
47. letter/
48. historical article/
49. or/46-48
50. 45 not 49
51. 23 and 50
52. animal/
53. human/
54. 52 not (52 and 53)
55. 51 not 54
56. limit 55 to english\
57. exp Adult/
58. Adult\*.tw.
59. Aged.tw.
60. Elderly.tw.
61. or/57-60
62. 56 and 61

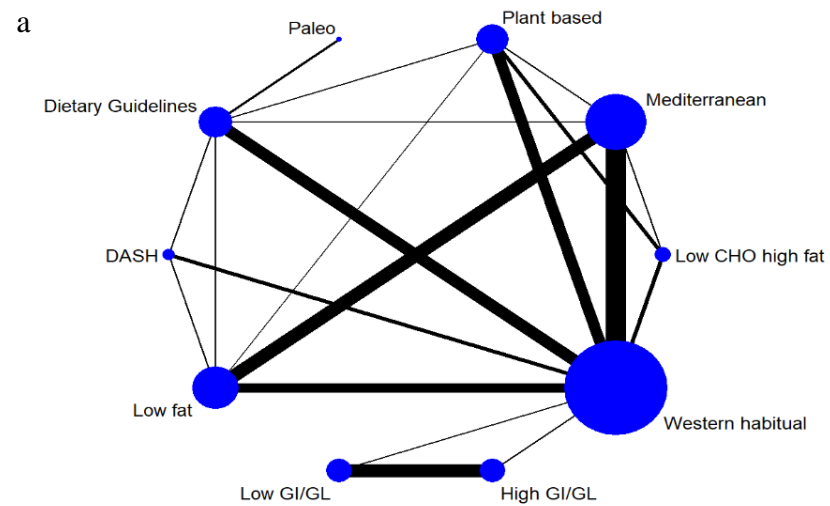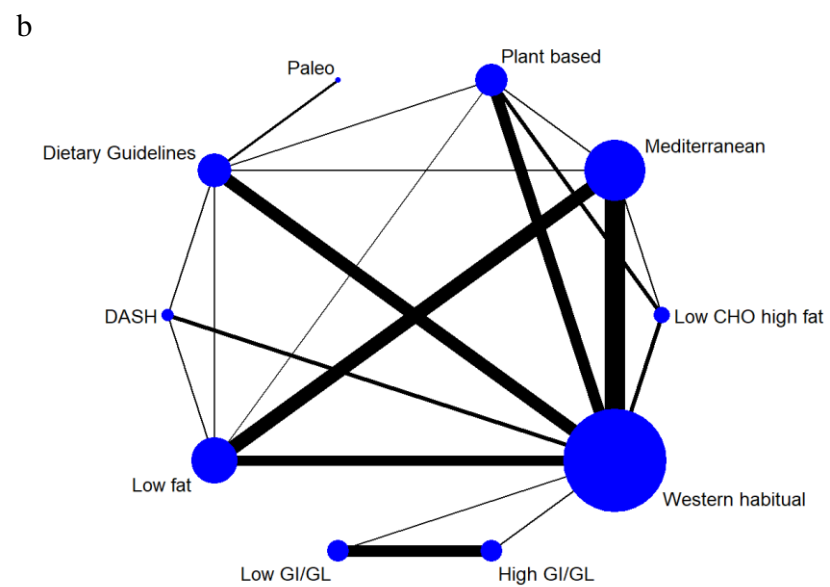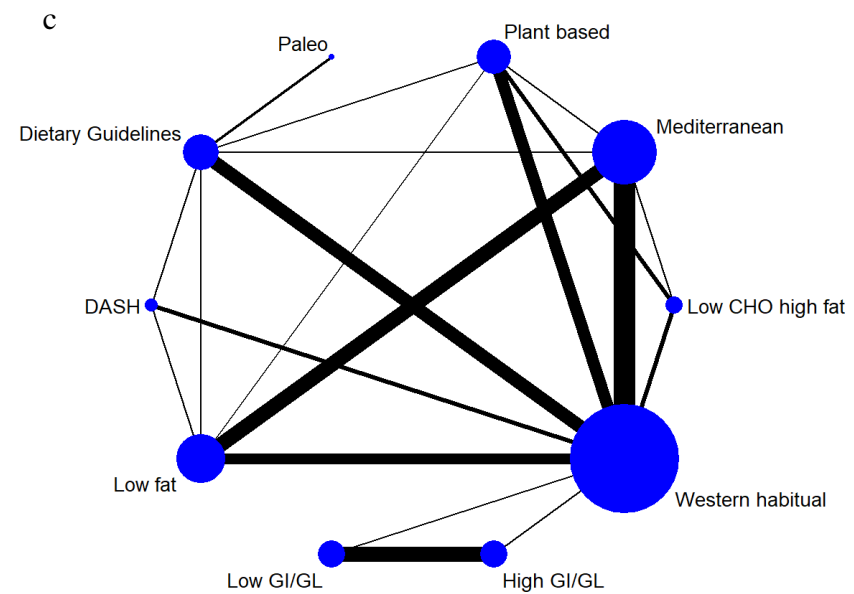



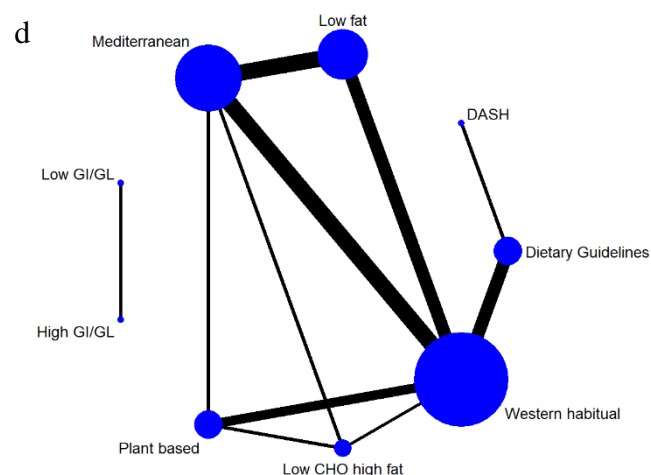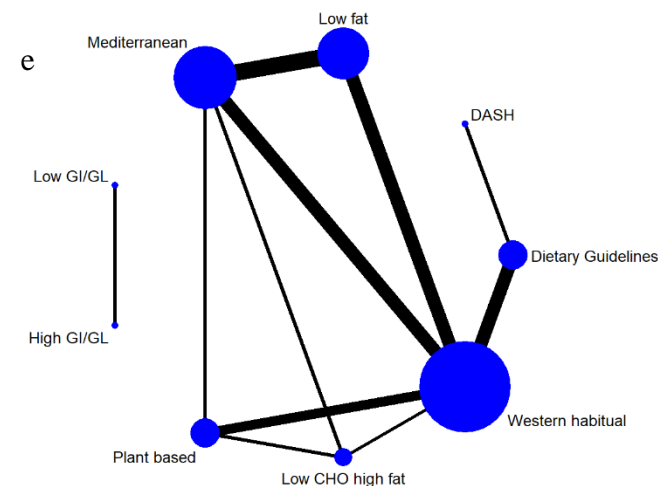

**Supplementary Figure S1.** Network diagrams for lipids illustrating the available direct comparisons between dietary patterns. The size of the nodes is proportional to the sample size of each dietary pattern intervention, and the thickness of the lines is proportional to the number of studies available. The number of studies for each dietary pattern were: a: High-Density Lipoprotein cholesterol: Mediterranean diet (n = 20); Dietary Approaches to Stop Hypertension (n = 5); Paleo diet (n = 2); Dietary guidelines-based diets (n = 13); low GI / GL diet (n = 10); plant-based diets (n = 10); low fat diet (n = 13); low carbohydrate high fat diet (n = 4); high GI / GL diet (n = 10); and western habitual diet (n = 35). b: Total cholesterol: Mediterranean diet (n = 20); Dietary Approaches to Stop Hypertension (n = 5); Paleo diet (n = 2); Dietary guidelines-based diets (n = 13); low GI / GL diet (n = 8); plant-based diets (n = 10); low fat diet (n = 13); low carbohydrate high fat diet (n = 4); high GI / GL diet (n = 8); and western habitual diet (n = 35). c: Triglycerides: Mediterranean diet (n = 20); Dietary Approaches to Stop Hypertension (n = 5); Paleo diet (n = 2); Dietary guidelines-based diets (n = 13); low GI / GL diet (n = 10); plant-based diets (n = 10); low fat diet (n = 13); low carbohydrate high fat diet (n = 4); high GI / GL diet (n = 10); and western habitual diet (n = 35). d: Apolipoprotein B: Mediterranean diet (n = 7); Dietary Approaches to Stop Hypertension (n = 1); Dietary guidelines-based diets (n = 5); plant-based diets (n = 4); low fat diet (n = 5); low carbohydrate high fat diet (n = 2); and western habitual diet (n = 13). e: Apolipoprotein A1: Mediterranean diet (n = 7); Dietary Approaches to Stop Hypertension (n = 1); Dietary guidelines-based diets (n = 5); plant-based diets (n = 4); low fat diet (n = 5); low carbohydrate high fat diet (n = 2); and western habitual diet (n = 12).

*Abbreviations:* CHO, carbohydrate; DASH, Dietary Approaches to Stop Hypertension; GI/GL glycemic index/glycemic load

a

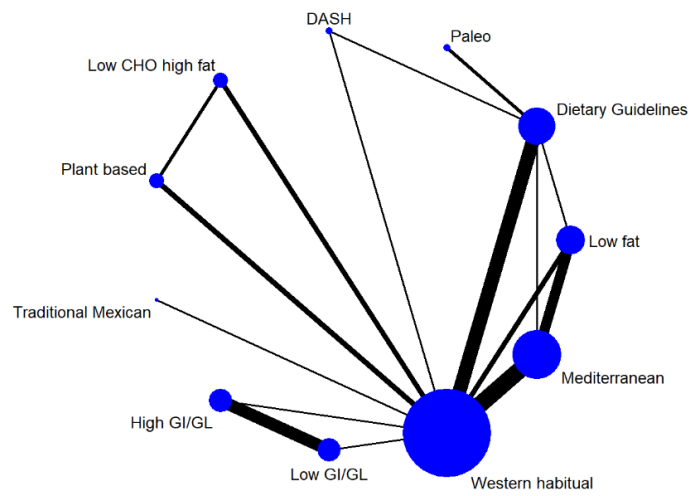

b

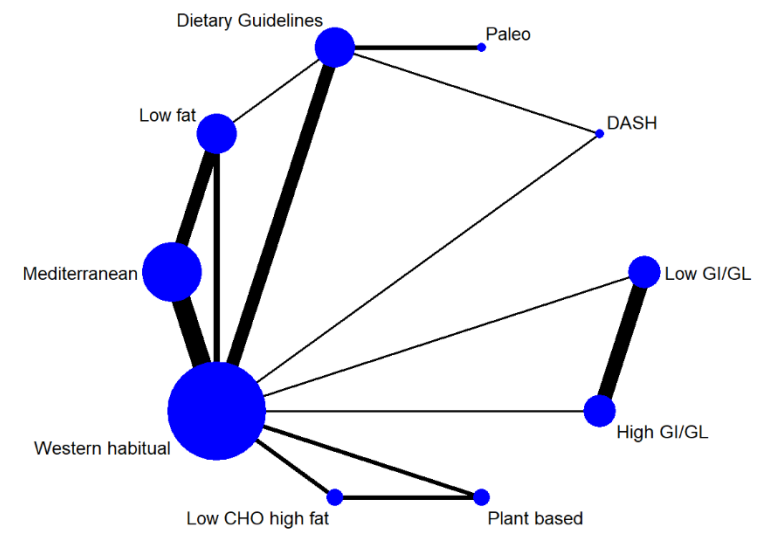

c

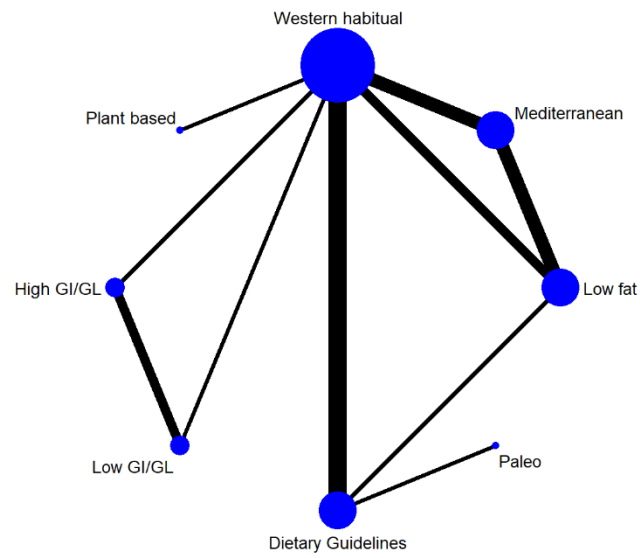

**Supplementary Figure S2.** Network diagrams for glycemic control biomarkers illustrating the available direct comparisons between dietary patterns. The size of the nodes is proportional to the sample size of each dietary pattern intervention, and the thickness of the lines is proportional to the number of studies available. The number of studies for each dietary pattern were: a: Glucose: Mediterranean diet (n = 15); Dietary Approaches to Stop Hypertension (n = 2); Paleo diet (n = 2); Dietary guidelines-based diets (n = 12); low GI / GL diet (n = 7); plant-based diets (n = 3); low fat diet (n = 7); low carbohydrate high fat diet (n = 3); traditional Mexican diet (n = 1); high GI / GL diet (n = 7); and western habitual diet (n = 25). b: Insulin: Mediterranean diet (n = 13); Dietary Approaches to Stop Hypertension (n = 2); Paleo diet (n = 2); Dietary guidelines-based diets (n = 9); low GI / GL diet (n = 7); plant-based diets (n = 2); low fat diet (n = 7); low carbohydrate high fat diet (n = 2); high GI / GL diet (n = 7); and western habitual diet (n = 19). c: Homeostatic model assessment for insulin resistance: Mediterranean diet (n = 5); Paleo diet (n = 1); Dietary guidelines-based diets (n = 5); low GI / GL diet (n = 2); plant-based diets (n = 1); low fat diet (n = 4); high GI / GL diet (n = 2); and western habitual diet (n = 9).

*Abbreviations:* CHO, carbohydrate; DASH, Dietary Approaches to Stop Hypertension; GI/GL glycemic index/glycemic load

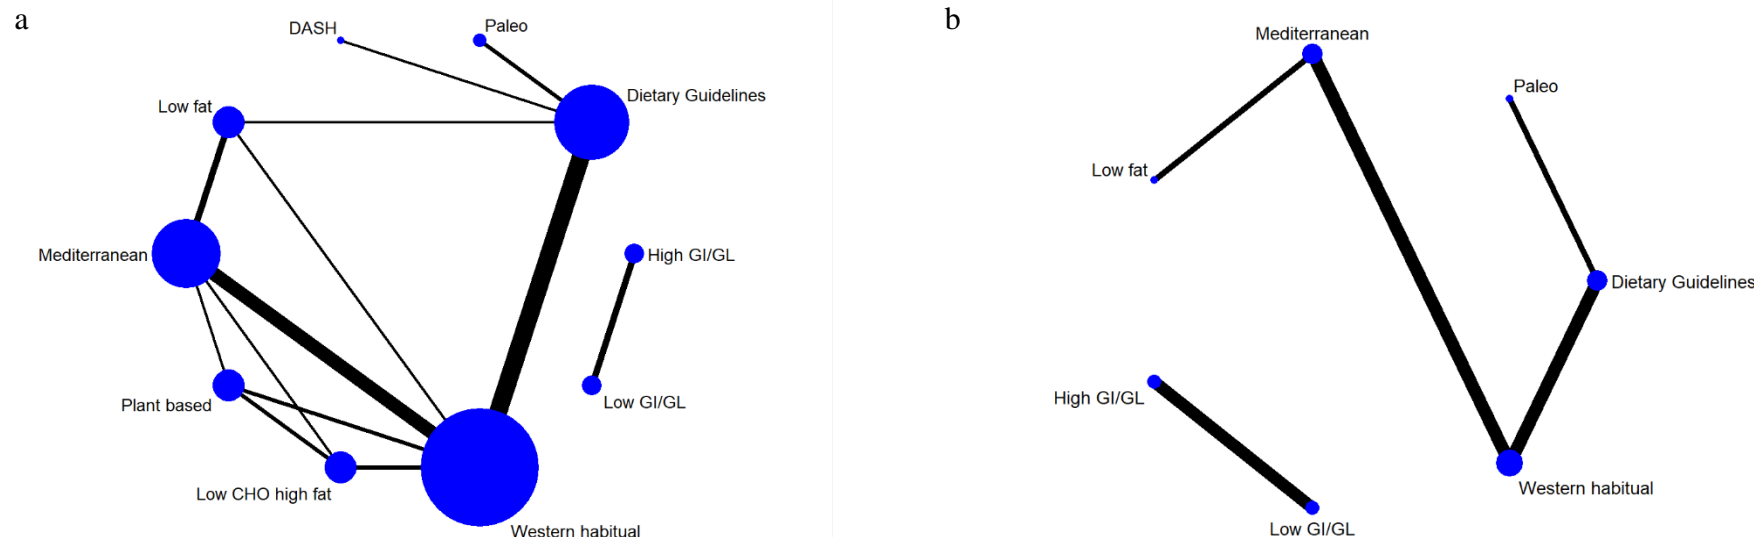

**Supplementary Figure S3.** Network diagrams for inflammatory biomarkers illustrating the available direct comparisons between dietary patterns. The size of the nodes is proportional to the sample size of each dietary pattern intervention, and the thickness of the lines is proportional to the number of studies available. The number of studies for each dietary pattern were: a: high sensitivity C-Reactive Protein: Mediterranean diet (n = 10); Dietary Approaches to Stop Hypertension (n = 1); Paleo diet (n = 2); Dietary guidelines-based diets (n = 12); plant-based diets (n = 3); low fat diet (n = 4); low carbohydrate high fat diet (n = 3); and western habitual diet (n = 18). b: Interleukin-6: Mediterranean diet (n = 3); Paleo diet (n = 1); Dietary guidelines-based diets (n = 3); low fat diet (n = 1); and western habitual diet (n = 4).

*Abbreviations:* CHO, carbohydrate; DASH, Dietary Approaches to Stop Hypertension; GI/GL glycemic index/glycemic load

**Supplementary Table S2:** Characteristics of studies included for quantitative syntheses

| Reference                              | Age (year) mean SD | % Female | Health status                 | Compliance Assessment                                                                                                                                                    | Intervention         | Control 1           | Control 2 | Biomarkers                                                                          | RoB              |
|----------------------------------------|--------------------|----------|-------------------------------|--------------------------------------------------------------------------------------------------------------------------------------------------------------------------|----------------------|---------------------|-----------|-------------------------------------------------------------------------------------|------------------|
| Abedi 2010[1]<br>Iran<br>Parallel      | 51.5<br>5.2        | 100      | healthy<br>postmeno<br>pausal | FFQ, 24h recall                                                                                                                                                          | Education (US<br>DG) | Control             | N/A       | Glucose<br>TC<br>LDL-c<br>HDL-c<br>TG                                               | Some<br>concerns |
| Adamsson 2010[2]<br>Sweden<br>Parallel | 53<br>7.9          | 63       | Healthy                       | Food provided<br>and diet history<br>performed                                                                                                                           | Healthy<br>Nordic    | Western<br>usual    | N/A       | CRP<br>Glucose<br>Insulin<br>HOMA-IR<br>TC<br>LDL-c<br>HDL-c<br>TG<br>ApoB<br>ApoA1 | Some<br>concerns |
| Ambring 2006[3]<br>Sweden<br>Crossover | 43<br>4.7          | 45       | Healthy                       | uneaten items<br>were to be<br>returned and<br>weighed at each<br>visit.<br>Furthermore, 3<br>unannounced<br>telephone<br>interviews (24-h<br>recalls) were<br>performed | MD                   | Ordinary<br>Swedish | N/A       | hsCRP<br>IL-6<br>Glucose<br>Insulin<br>TC<br>LDL-c<br>HDL-c<br>TG<br>ApoB           | Some<br>concerns |

| Reference                                   | Age (year) mean SD | % Female | Health status                      | Compliance Assessment                     | Intervention | Control 1                                           | Control 2        | Biomarkers                                                        | RoB           |
|---------------------------------------------|--------------------|----------|------------------------------------|-------------------------------------------|--------------|-----------------------------------------------------|------------------|-------------------------------------------------------------------|---------------|
| Blomquist 2017[4]<br>Sweden<br>Parallel     | 60.5<br>6.3        | 100      | overweight/obese<br>postmenopausal | 4-day estimated self-reported food record | Paleo        | Healthy Nordic (called prudent in paper)            | N/A              | IL-6                                                              | Some concerns |
| Bos 2010[5]<br>the Netherlands<br>Parallel  | 55.9<br>6.7        | 58       | mild abdominal obesity             | provided, high compliance                 | MD           | *High MUFA diet otherwise similar to a western diet | Western habitual | Glucose<br>Insulin<br>HOMA-IR<br>TC<br>LDL-c<br>HDL-c<br>TG       | Some concerns |
| Botero 2009[6]<br>USA<br>Crossover          | 29.4<br>4.4        | 0        | overweight/obese                   | Meals were provided and monitored         | Low GI       | High GI                                             | N/A              | CRP<br>TC<br>LDL-c<br>HDL-c<br>TG                                 | Low           |
| Bouché 2002[7]<br>France<br>Crossover       | 46<br>3<br>(sem)   | 0        | Healthy                            | 7d food diary                             | Low GI       | High GI                                             | N/A              | Glucose<br>Insulin<br>TC<br>LDL-c<br>HDL-c<br>TG<br>ApoB<br>ApoA1 | Some concerns |
| Bravo-Herrera 2004[8]<br>Spain<br>Crossover | 23.4<br>5.6        | 48       | Healthy                            | Provided and supervised                   | MD           | Low fat (high CHO)                                  | Western habitual | ApoB<br>ApoA1                                                     | High          |

| Reference                                      | Age (year) mean SD | % Female | Health status                                        | Compliance Assessment                                                                             | Intervention | Control 1                      | Control 2  | Biomarkers                                                  | RoB           |
|------------------------------------------------|--------------------|----------|------------------------------------------------------|---------------------------------------------------------------------------------------------------|--------------|--------------------------------|------------|-------------------------------------------------------------|---------------|
| Brynes 2003[9]<br>UK<br>Crossover              | 45<br>8            | 0        | Overweight, at increased CHD risk, otherwise healthy | Some foods provided, returning containers/leftover foods; five 7d diet diaries<br>100% compliance | Low GI       | High GI                        | High fat   | Glucose<br>Insulin<br>HOMA-IR<br>TC<br>LDL-c<br>HDL-c<br>TG | Some concerns |
| Casas 2014[10]<br>Spain<br>Parallel            | 67.7<br>6          | 53       | Increased risk of CVD, 77% T2D                       | 14-item questionnaire MD<br>9-item LFD                                                            | MD           | Low fat                        | N/A        | hsCRP                                                       | High          |
| Casas 2016[11]<br>Spain<br>Parallel            | 66.3<br>5.9        | 54       | At increased CVD risk, 75% T2D                       | 14-item questionnaire MD<br>9-item LFD                                                            | MD           | Low fat                        | N/A        | Glucose<br>TC<br>LDL-c<br>HDL-c<br>TG                       | High          |
| Casas 2017[12]<br>Spain<br>Parallel            | 66.6<br>5.9        | 53       | At increased risk of CVD, 64% T2D                    | 14-item questionnaire MD<br>9-item LFD                                                            | MD           | Low fat                        | N/A        | IL-6                                                        | High          |
| Chen 2010[13]<br>USA<br>DASH-Trial<br>Parallel | 44.7<br>10.7       | 49       | prehypertensive or stage 1 hypertension not on med   | Food was provided and supervised, food records used                                               | DASH         | High fruit and vegetables diet | Typical US | TC<br>LDL-c<br>HDL-c<br>TG                                  | Some concerns |

| Reference                               | Age<br>(year)<br>mean<br>SD | % Female | Health<br>status                              | Compliance<br>Assessment                               | Intervention               | Control 1                  | Control 2                    | Biomarkers                                                | RoB              |
|-----------------------------------------|-----------------------------|----------|-----------------------------------------------|--------------------------------------------------------|----------------------------|----------------------------|------------------------------|-----------------------------------------------------------|------------------|
| Clapp 2007[14]<br>USA<br>Crossover      | 35<br>8                     | 100      | Healthy                                       | Meal was<br>provided and<br>monitored                  | Low GI                     | High GI                    | N/A                          | Glucose<br>Insulin<br>TC<br>LDL-c<br>HDL-c<br>TG          | Some<br>concerns |
| Cooper 1982[15]<br>USA<br>Crossover     | 28<br>NA                    | 33       | Healthy                                       | Standard recipes<br>provided, 24h<br>food records kept | Vegetarian                 | Typical US                 | N/A                          | Glucose<br>TC<br>LDL-c<br>HDL-c<br>TG<br>ApoB<br>ApoA1    | Some<br>concerns |
| Dansinger 2005[16]<br>USA<br>Parallel   | 49<br>11                    | 51       | overweig<br>ht/obese                          | 3-day diet records                                     | Atkins (CHO<br>restricted) | Ornish (fat<br>restricted) | Zone<br>(macros<br>balanced) | CRP<br>Glucose<br>Insulin<br>TC<br>LDL-c<br>HDL-c<br>TG   | Low              |
| Davis 2017[17]<br>Australia<br>Parallel | 70.9<br>4.8                 | 56       | nonsmoke<br>rs, free of<br>chronic<br>disease | 3-day weighed<br>food records at 3<br>timepoints       | MD                         | Habitual<br>(AU)           | N/A                          | hsCRP<br>Glucose<br>Insulin<br>TC<br>LDL-c<br>HDL-c<br>TG | Some<br>concerns |



| Reference                                    | Age (year) mean SD | % Female | Health status                                                                    | Compliance Assessment                                 | Intervention                     | Control 1                 | Control 2    | Biomarkers                                                           | RoB           |
|----------------------------------------------|--------------------|----------|----------------------------------------------------------------------------------|-------------------------------------------------------|----------------------------------|---------------------------|--------------|----------------------------------------------------------------------|---------------|
| de Rougemont 2007[18]<br>France<br>Parallel  | 38.4<br>9.3        | 47       | overweight                                                                       | dietary records                                       | Low GI                           | High GI                   | N/A          | Glucose<br>Insulin<br>HOMA-IR<br>TC<br>LDL-c<br>HDL-c<br>TG          | Some concerns |
| Djuric 2009[19]<br>USA<br>Parallel           | 44<br>NA           | 100      | Healthy                                                                          | 7d food diary                                         | MD                               | Control (usual care)      | N/A          | CRP<br>Glucose<br>Insulin<br>TC<br>LDL-c<br>HDL-c<br>TG              | Some concerns |
| Due 2008[20]<br>Denmark<br>Parallel          | 28.2<br>4.8        | 58       | overweight/obese at recruitment then $\geq 8\%$ weight loss before randomisation | fat biopsy (oleic acid, linoleic acid, myristic acid) | Healthy Eating Pyramid high MUFA | USDA food pyramid low fat | Control diet | hsCRP<br>Glucose<br>Insulin<br>HOMA-IR<br>TC<br>LDL-c<br>HDL-c<br>TG | Low           |
| Fernández-Real 2012[21]<br>Spain<br>Parallel | 67.9<br>6.3        | 0        | Increased CVD risk, or diagnosed with T2D                                        | 137-item FFQ<br>14-item questionnaire MD              | MD                               | Low fat                   | N/A          | Insulin                                                              | High          |

| Reference                                | Age<br>(year)<br>mean<br>SD | % Female | Health<br>status                   | Compliance<br>Assessment                                                                                                               | Intervention               | Control 1                    | Control 2 | Biomarkers                                              | RoB              |
|------------------------------------------|-----------------------------|----------|------------------------------------|----------------------------------------------------------------------------------------------------------------------------------------|----------------------------|------------------------------|-----------|---------------------------------------------------------|------------------|
| Fuentes 2008[22]<br>Spain<br>Crossover   | 23.3<br>1.5                 | 0        | Healthy                            | analysing the fatty<br>acids in LDL-<br>cholesteryl esters<br>at the end of each<br>dietary period by<br>the Ruiz-<br>Gutierrez method | MD                         | Low fat<br>(ALA<br>enriched) | Western   | TC<br>LDL-c<br>HDL-c<br>TG                              | Some<br>concerns |
| Gardner 2005[23]<br>USA<br>Parallel      | 48.5<br>9.1                 | 50       | Healthy                            | Food provided,<br>Dietary daily log                                                                                                    | low fat plant-<br>based    | Low fat                      | N/A       | TC<br>LDL-c<br>HDL-c<br>TG                              | Low              |
| Gardner 2007[24]<br>USA<br>Parallel      | 41<br>6                     | 100      | Healthy                            | 3d, 24h dietary<br>recalls                                                                                                             | Atkins (CHO<br>restricted) | Ornish                       | Zone      | Glucose<br>Insulin<br>TC<br>LDL-c<br>HDL-c<br>TG        | Low              |
| Genoni 2016[25]<br>Australia<br>Parallel | 47<br>13                    | 100      | Healthy                            | 3d WFR<br>daily checklist                                                                                                              | Paleo                      | DG (AGHE)                    | N/A       | CRP<br>Glucose<br>Insulin<br>TC<br>LDL-c<br>HDL-c<br>TG | Low              |
| Hinderliter 2011[26]<br>USA<br>Parallel  | 52<br>10                    | 67       | overweig<br>ht/obese,<br>higher BP | No information                                                                                                                         | DASH                       | Western<br>usual diet        | N/A       | Glucose<br>Insulin<br>TC<br>LDL-c<br>HDL-c<br>TG        | Some<br>concerns |

| Reference                               | Age (year) mean SD                   | % Female | Health status                 | Compliance Assessment                      | Intervention                                          | Control 1                      | Control 2 | Biomarkers                                       | RoB              |
|-----------------------------------------|--------------------------------------|----------|-------------------------------|--------------------------------------------|-------------------------------------------------------|--------------------------------|-----------|--------------------------------------------------|------------------|
| Howard 2006[27]<br>USA<br>Parallel      | 62.3<br>6.9                          | 100      | healthy<br>postmeno<br>pausal | FFQ                                        | Low fat high<br>fruit,<br>vegetables,<br>whole grains | Usual diet                     | N/A       | LDL-c<br>HDL-c                                   | Some<br>concerns |
| Hunt 1998[28]<br>USA<br>Crossover       | 33.2<br>7.0                          | 100      | Healthy                       | Provided and<br>supervised                 | Lacto-ovo<br>vegetarian                               | Non<br>vegetarian<br>(western) | N/A       | TC<br>LDL-c<br>HDL-c<br>TG<br>ApoB<br>ApoA1      | Some<br>concerns |
| Hunt 1999[29]<br>USA<br>Crossover       | 33.2<br>7.0                          | 100      | Healthy                       | Provided and<br>supervised                 | Lacto-ovo<br>vegetarian                               | Non<br>vegetarian<br>(western) | N/A       | CRP                                              | Some<br>concerns |
| Jenkins 1987[30]<br>Canada<br>Crossover | 33<br>4                              | 0        | healthy                       | Provided, diet<br>history recorded         | Low GI                                                | High GI                        | N/A       | Glucose<br>Insulin<br>TC<br>LDL-c<br>HDL-c<br>TG | Some<br>concerns |
| Jensen 2008[31]<br>Denmark<br>Parallel  | 20-40<br>(inclusion<br>criteria<br>) | 100      | overweight                    | Highly controlled,<br>provided             | Low GI                                                | High GI                        | N/A       | Glucose<br>Insulin<br>TC<br>LDL-c<br>HDL-c<br>TG | Some<br>concerns |
| Kahleova 2018[32]<br>USA<br>Parallel    | 53.2<br>12.6                         | 89       | overweight/obese              | Food not<br>provided, 3d<br>dietary record | Low fat vegan                                         | US habitual                    | N/A       | HOMA-IR                                          | Low              |

| Reference                                    | Age (year)<br>mean<br>SD | % Female | Health status | Compliance Assessment                                                                                                                                                                                                                                                 | Intervention         | Control 1     | Control 2   | Biomarkers                                                          | RoB           |
|----------------------------------------------|--------------------------|----------|---------------|-----------------------------------------------------------------------------------------------------------------------------------------------------------------------------------------------------------------------------------------------------------------------|----------------------|---------------|-------------|---------------------------------------------------------------------|---------------|
| Kestin 1989[33]<br>Australia<br>Crossover    | 44.0<br>10.0             | 0        | Healthy       | Partially provided, recipes, measuring tools provided. 4d food records completed                                                                                                                                                                                      | Lacto-ovo vegetarian | Prudent       | AU habitual | TC<br>LDL-c<br>HDL-c<br>TG                                          | Low           |
| Kim 2017[34]<br>Australia<br>Crossover       | 35.1<br>15.6             | 71       | Healthy       | 3d WFR daily checklist (The key foods consumed were 241 g of red meat, 56 g of processed meat (19% protein) and 320 g of refined grains (44% carbohydrate) compared with 70 g of nuts, 236 g of wholegrains and 687 g of dairy foods (19% protein, 37% carbohydrate)) | Healthy              | Unhealthy     | N/A         | hsCRP<br>IL-6<br>Glucose<br>Insulin<br>HOMA-IR<br>TC<br>HDL-c<br>TG | Low           |
| Konstantinidou 2010[35]<br>Spain<br>Parallel | 44.3<br>11.1             | 71       | Healthy       | Dietitian consultation, Tyrosol and hydroxytyrosol                                                                                                                                                                                                                    | MD                   | Habitual (EU) | N/A         | CRP<br>Glucose<br>TC<br>LDL-c<br>HDL-c<br>TG                        | Some concerns |

| Reference                               | Age<br>(year)<br>mean<br>SD | % Female | Health<br>status                           | Compliance<br>Assessment                                                             | Intervention      | Control 1                    | Control 2 | Biomarkers                                                | RoB              |
|-----------------------------------------|-----------------------------|----------|--------------------------------------------|--------------------------------------------------------------------------------------|-------------------|------------------------------|-----------|-----------------------------------------------------------|------------------|
| Ling 1992[36]<br>Finland<br>Parallel    | 43.3<br>16.7                | 70       | Healthy                                    | Food records                                                                         | Uncooked<br>vegan | Finland<br>habitual          | N/A       | TC<br>LDL-c<br>HDL-c<br>TG<br>ApoB<br>ApoA1               | Some<br>concerns |
| Marin 2011[37]<br>Spain<br>Crossover    | 67.1<br>4.52                | 50       | Healthy                                    | 24-h recall                                                                          | MD                | Low fat<br>(ALA<br>enriched) | Western   | TC<br>LDL-c<br>HDL-c<br>TG<br>ApoB<br>ApoA1               | Some<br>concerns |
| Mellberg 2014[38]<br>Sweden<br>Parallel | 59.9<br>5.7                 | 100      | overweig<br>ht/obese<br>postmeno<br>pausal | 4-day estimated<br>self-reported food<br>record;<br>poor adherence in<br>Paleo group | Paleo             | Healthy<br>Nordic            | N/A       | hsCRP                                                     | Low              |
| Meslier 2020[39]<br>Italy<br>Parallel   | 43<br>12                    | 52       | overweig<br>ht/obese                       | 7d food diary                                                                        | MD                | Habitual<br>(EU)             | N/A       | hsCRP<br>Glucose<br>Insulin<br>TC<br>LDL-c<br>HDL-c<br>TG | Some<br>concerns |
| Miller 2005[40]<br>USA<br>Parallel      | 52<br>10                    | 56       | Healthy                                    | all food was<br>provided                                                             | DASH              | US                           | N/A       | TC<br>LDL-c<br>HDL-c<br>TG                                | Some<br>concerns |

| Reference                                  | Age (year) mean SD | % Female | Health status                           | Compliance Assessment                                 | Intervention                                     | Control 1                                            | Control 2                       | Biomarkers                                                               | RoB           |
|--------------------------------------------|--------------------|----------|-----------------------------------------|-------------------------------------------------------|--------------------------------------------------|------------------------------------------------------|---------------------------------|--------------------------------------------------------------------------|---------------|
| Miller 2009[41]<br>USA<br>Crossover        | 30.6<br>9.6        | 50       | Healthy                                 | Food records<br>Excellent compliance                  | MD (South Beach)                                 | High (sat) fat<br>low CHO<br>(Atkins)                | High<br>CHO low fat<br>(Ornish) | CRP<br>TC<br>LDL-c<br>HDL-c<br>TG<br>ApoB<br>ApoA1                       | Some concerns |
| Mishra 2013[42]<br>USA<br>Parallel         | 45.2<br>14.5       | 83       | BMI $\geq$ 25<br>and/or<br>T2D          | 24h diet recall<br>(ASA24)                            | Vegan                                            | US habitual                                          | N/A                             | TC<br>LDL-c<br>HDL-c<br>TG                                               | Low           |
| Mohammadshahi 2014[43]<br>Iran<br>Parallel | 34.15<br>5.34      | 100      | Obese                                   | 7d food record                                        | HEI<br>(Education)                               | Habitual                                             | N/A                             | hsCRP                                                                    | Low           |
| Morgantini 2018[44]<br>Italy<br>Crossover  | 25<br>2.3          | 57       | Healthy                                 | Daily food record                                     | Healthy<br>Western (Low cholesterol,<br>low fat) | Unhealthy<br>Western (High cholesterol,<br>high fat) | N/A                             | CRP<br>Glucose<br>Insulin<br>TC<br>LDL-c<br>HDL-c<br>TG<br>ApoB<br>ApoA1 | Some concerns |
| Newhouser 2012[45]<br>USA<br>Crossover     | 29.5<br>8.1        | 50       | 50%<br>overweig<br>ht/obese             | Food provision,<br>daily checklist<br>completed       | Low GL                                           | High GL                                              | N/A                             | hsCRP<br>IL-6                                                            | Some concerns |
| Nowson 2005[46]<br>Australia<br>Parallel   | 47.9<br>9.3        | 0        | Elevated<br>BP,<br>overweig<br>ht/obese | Dietary<br>counselings, 24h<br>dietary record,<br>FFQ | DASH type                                        | Low fat                                              | N/A                             | TC<br>LDL-c<br>HDL-c<br>TG                                               | Some concerns |

| Reference                                        | Age<br>(year)<br>mean<br>SD | % Female | Health<br>status     | Compliance<br>Assessment                                                                    | Intervention      | Control 1                            | Control 2 | Biomarkers                                                                      | RoB              |
|--------------------------------------------------|-----------------------------|----------|----------------------|---------------------------------------------------------------------------------------------|-------------------|--------------------------------------|-----------|---------------------------------------------------------------------------------|------------------|
| Paniagua 2007[47]<br>Spain<br>Crossover          | 62<br>9.4                   | 64       | Insulin<br>resistant | Fatty acids<br>measured at the<br>end of each<br>dietary period by<br>gas<br>chromatography | MD                | Low fat<br>(high CHO)                | High SFA  | Glucose<br>Insulin<br>HOMA-IR<br>TC<br>LDL-c<br>HDL-c<br>TG<br>ApoB100<br>ApoA1 | Some<br>concerns |
| Pérez-Jiménez<br>2001[48]<br>Spain<br>Crossover  | 23.1<br>1.8                 | 49       | Healthy              | Provided and<br>supervised,<br>compliance also<br>evaluated using<br>7d food diaries        | MD                | Low fat<br>(high CHO)                | High SFA  | Glucose<br>Insulin<br>TC<br>LDL-c<br>HDL-c<br>TG                                | High             |
| Perez-Martinez<br>2006[49]<br>Spain<br>Crossover | NA<br>NA                    | 0        | healthy              | Provided and<br>supervised                                                                  | MD                | Low fat, high<br>CHO n-3<br>enriched | Western   | TC<br>LDL-c<br>HDL-c<br>TG<br>ApoB<br>ApoA1                                     | Some<br>concerns |
| Poulsen 2014[50]<br>Denmark<br>Parallel          | 42.1<br>13.1                | 71       | overweig<br>ht/obese | 3d WFR<br>(nonconsecutive)                                                                  | Healthy<br>Nordic | Average<br>Danish                    | N/A       | hsCRP<br>Glucose<br>Insulin<br>HOMA-IR<br>TC<br>LDL-c<br>HDL-c<br>TG            | Low              |

| Reference                               | Age (year) mean SD | % Female | Health status                        | Compliance Assessment                                                                                                                                                                    | Intervention | Control 1                              | Control 2 | Biomarkers                                                                 | RoB           |
|-----------------------------------------|--------------------|----------|--------------------------------------|------------------------------------------------------------------------------------------------------------------------------------------------------------------------------------------|--------------|----------------------------------------|-----------|----------------------------------------------------------------------------|---------------|
| Rallidis 2009[51]<br>Greece<br>Parallel | 50.4<br>7.3        | 48       | abdominal obesity, otherwise healthy | weekly phone calls, 3d food diaries, 24h recall, food check list, food partially provided, empty food packages returned                                                                  | MD           | Control (less counselling)             | N/A       | Glucose<br>Insulin<br>HOMA-IR<br>TC<br>LDL-c<br>HDL-c<br>TG                | Some concerns |
| Rallidis 2017[52]<br>Greece<br>Parallel | 50.4<br>7.3        | 45       | Abdominal obesity                    | weekly telephone contacts with dietitian session attendance<br>3-day food diaries<br>24-h recalls<br>check list of the daily consumed foods<br>returning empty packages of food provided | MD           | Control (less counselling, usual care) | N/A       | hsCRP<br>IL-6                                                              | Some concerns |
| Reidlinger 2015[53]<br>UK<br>Parallel   | 52.5<br>8          | 60       | Healthy                              | 4d food record<br>24h urine sodium                                                                                                                                                       | DG (UK)      | Traditional British                    | N/A       | hsCRP<br>Glucose<br>Insulin<br>TC<br>LDL-c<br>HDL-c<br>TG<br>ApoB<br>ApoA1 | Low           |



| Reference                                       | Age<br>(year)<br>mean<br>SD | % Female | Health<br>status                               | Compliance<br>Assessment                                                                | Intervention           | Control 1            | Control 2                                    | Biomarkers                                                                 | RoB              |
|-------------------------------------------------|-----------------------------|----------|------------------------------------------------|-----------------------------------------------------------------------------------------|------------------------|----------------------|----------------------------------------------|----------------------------------------------------------------------------|------------------|
| Retterstøl 2018[54]<br>Norway<br>Parallel       | 25.4<br>4.9                 | 83       | Healthy                                        | WFR<br>Showed good<br>compliance                                                        | Low CHO<br>high Fat    | Habitual<br>(Norway) | N/A                                          | CRP<br>Glucose<br>TC<br>LDL-c<br>HDL-c<br>TG<br>ApoB<br>ApoA1              | Some<br>concerns |
| Roussell 2012[55]<br>USA<br>Crossover           | 50<br>1.4<br>(sem)          | 58       | Hypercho<br>lesterolem<br>ic                   | daily and weekly<br>compliance<br>questionnaires                                        | DASH                   | Healthy US           | The other<br>two arms<br>are not<br>relevant | hsCRP<br>Glucose<br>Insulin<br>TC<br>LDL-c<br>HDL-c<br>TG<br>ApoB<br>ApoA1 | Some<br>concerns |
| Sacks 2014[56]<br>USA<br>Crossover              | 53<br>11                    | 52       | Overweig<br>ht,<br>normal-<br>hypertensi<br>ve | Provided and<br>supervised,<br>compliance also<br>evaluated using<br>daily food diaries | Low GI                 | High GI              | N/A                                          | LDL-c<br>HDL-c<br>TG                                                       | Low              |
| Santiago-Torres<br>2016[57]<br>USA<br>Crossover | 27<br>8                     | 100      | Healthy                                        | daily checkoff<br>forms;leftover<br>weighted                                            | Traditional<br>Mexican | US                   | N/A                                          | Glucose                                                                    | Some<br>concerns |

| Reference                                                                    | Age (year) mean SD | % Female | Health status                                     | Compliance Assessment                                              | Intervention   | Control 1         | Control 2 | Biomarkers                                                      | RoB           |
|------------------------------------------------------------------------------|--------------------|----------|---------------------------------------------------|--------------------------------------------------------------------|----------------|-------------------|-----------|-----------------------------------------------------------------|---------------|
| Shikany 2009[58]<br>USA<br>Crossover                                         | 34.5<br>8.1        | 0        | Overweight/obese                                  | all food provided, questioned about adherence at each meal pick-up | Low GI/GL      | High GI/GL        | N/A       | CRP<br>IL-6<br>Glucose<br>Insulin<br>TC<br>LDL-c<br>HDL-c<br>TG | Low           |
| Singh 2002[59]<br>India<br>Parallel                                          | 48.5<br>9.5        | 10       | Increased risk of CAD, 21% T2D                    | Dietitian consultations, Food diaries                              | MD             | Prudent           | N/A       | Glucose<br>TC<br>LDL-c<br>HDL-c<br>TG                           | Some concerns |
| Stomby 2015[60]<br>Sweden<br>Parallel                                        | 59.9<br>5.7        | 100      | Overweight/obese postmenopausal                   | Dietitian sessions to promote compliance                           | Paleo          | Healthy Nordic    | N/A       | Glucose<br>Insulin<br>HOMA-IR<br>TC<br>LDL-c<br>HDL-c<br>TG     | Low           |
| Tuomainen 2019[61]<br>Nordic (Finland, Sweden, Denmark, Iceland)<br>Parallel | 54.7<br>8.3        | 66       | Overweight/obese with impaired glucose metabolism | 4d food record                                                     | Healthy Nordic | Habitual (Nordic) | N/A       | CRP<br>Glucose<br>TC<br>LDL-c<br>HDL-c<br>TG                    | Some concerns |

| Reference                                                                   | Age (year) mean SD | % Female | Health status                          | Compliance Assessment                                                                                                             | Intervention   | Control 1         | Control 2 | Biomarkers                                                                   | RoB           |
|-----------------------------------------------------------------------------|--------------------|----------|----------------------------------------|-----------------------------------------------------------------------------------------------------------------------------------|----------------|-------------------|-----------|------------------------------------------------------------------------------|---------------|
| Uusitupa 2013[62]<br>Nordic (Finland, Sweden, Denmark, Iceland)<br>Parallel | 54.4<br>8.5        | 67       | features of metabolic syndrome         | dietary record                                                                                                                    | Healthy Nordic | Habitual (Nordic) | N/A       | hsCRP<br>IL-6<br>ApoB<br>ApoA1                                               | High          |
| Vincent-Baudry 2005[63]<br>France<br>Parallel                               | 51.2<br>10.5       | 59       | overweight/obese at increased CVD risk | 3d food records, 24h dietary recalls                                                                                              | MD             | Low fat           | N/A       | Glucose<br>Insulin<br>HOMA-IR<br>TC<br>LDL-c<br>HDL-c<br>TG<br>ApoB<br>ApoA1 | Some concerns |
| Vitale 2021[64]<br>Italy<br>Parallel                                        | 43.5<br>12.6       | 52       | Healthy                                | 7d food diary                                                                                                                     | MD             | Habitual (Italy)  | N/A       | Glucose<br>Insulin<br>TC<br>LDL-c<br>HDL-c<br>TG                             | Low           |
| Wade 2018[65]<br>Australia<br>Crossover                                     | 60.2<br>6.9        | 68       | At increased CVD risk                  | yoghurt, nuts, evoo, cheese, chickpeas, beans, lentils, canned tuna and salmon provided;<br>3d WFR<br>14 item MD score calculated | MD (Dairy)     | Low fat           | N/A       | CRP<br>Glucose<br>Insulin<br>HOMA-IR<br>TC<br>LDL-c<br>HDL-c<br>TG           | Low           |

| Reference                                  | Age (year) mean SD | % Female | Health status                                     | Compliance Assessment                                                                   | Intervention        | Control 1   | Control 2          | Biomarkers                                              | RoB |
|--------------------------------------------|--------------------|----------|---------------------------------------------------|-----------------------------------------------------------------------------------------|---------------------|-------------|--------------------|---------------------------------------------------------|-----|
| Wade 2019[66]<br>Australia<br>Crossover    | 61<br>7.1          | 70       | At increased CVD risk                             | EVOO, pork, nuts, chickpeas, beans and lentils, canned tuna and salmon provided; 3d WFR | MD (Pork)           | Low fat     | N/A                | CRP<br>Glucose<br>Insulin<br>TC<br>LDL-c<br>HDL-c<br>TG | Low |
| Wardle 2000[67]<br>UK<br>Parallel          | 48.5<br>14.1       | 52       | overweight with elevated serum cholesterol levels | Education sessions, dietary diaries completed                                           | MD                  | Low fat     | Control (waitlist) | TC<br>LDL-c<br>HDL-c<br>TG                              | Low |
| Wright 2017[68]<br>New Zealand<br>Parallel | 56.0<br>9.6        | 60       | overweight/obese, 14% T2D, 67% CVD                | Dietary indiscretions over 3 days recorded                                              | Low fat plant-based | NZ habitual | N/A                | TC<br>LDL-c<br>HDL-c<br>TG                              | Low |

*Abbreviations:* AGHE, Australian Guide to Healthy Eating; ALA,  $\alpha$ -Linolenic acid; ApoA1, apolipoprotein A-I; ApoB, apolipoprotein B; ASA24, automated self-administered recall system; AU, Australian; BP, blood pressure; CHD, coronary heart disease; CHO, carbohydrate; CRP, C-reactive protein; CVD, cardiovascular disease; DASH, dietary approaches to stop hypertension; DG, dietary guideline; EU, European; EVOO, extra virgin olive oil; FFQ, food frequency questionnaire; GI, glycemic index; GL, glycemic load; HDL-c, high density lipoprotein cholesterol; HOMA-IR, homeostatic model assessment for insulin resistance; hsCRP, high sensitivity C-reactive protein; IL-6, interleukin-6; LDL-c, low density lipoprotein cholesterol; LFD, low fat diet; MD, Mediterranean diet; MUFA, monounsaturated fatty acid; NZ, New Zealand; RoB, risk of bias; T2D, type 2 diabetes; TC, total cholesterol; TG, triglycerides; UK, United Kingdom; US, United States; WFR, weighed food record

**Supplementary Table S3.** Study-outcomes excluded from quantitative synthesis: characteristics and end-of-intervention biomarker concentrations

| Reference                              | Age (year) mean SD | % Female | Health status             | Compliance Assessment                                                                                  | Intervention                                       | Control 1                        | Control 2  | Biomarkers                                                                                                                                                               | RoB              |
|----------------------------------------|--------------------|----------|---------------------------|--------------------------------------------------------------------------------------------------------|----------------------------------------------------|----------------------------------|------------|--------------------------------------------------------------------------------------------------------------------------------------------------------------------------|------------------|
| Howard 2006[27]<br>USA<br>Parallel     | 62.3<br>6.9        | 100      | Healthy<br>postmenopausal | FFQ                                                                                                    | Low fat high<br>fruit, vegetables,<br>whole grains | Usual diet                       | N/A        | *geometric mean<br><br>Low fat<br>TG: $1.61 \pm 0.76$ mmol/L<br><br>Western habitual<br>TG: $1.63 \pm 0.72$ mmol/L                                                       | Some<br>concerns |
| Jurascheck 2020[69]<br>USA<br>Parallel | 45.2<br>0.6        | 48.2     | Healthy                   | Meals<br>provided and<br>supervised<br>95% person-<br>days onsite<br>meals<br>93% offsite<br>adherence | DASH                                               | High fruit and<br>vegetable diet | Typical US | *geometric mean<br><br>DASH<br>hsCRP: $1.7 \pm 0.2$ mg/L<br><br>High Fruit & Vegetable<br>hsCRP: $1.5 \pm 0.2$ mg/L<br><br>Western habitual<br>hsCRP: $1.2 \pm 0.1$ mg/L | Some<br>concerns |

| Reference                            | Age (year) mean SD | % Female | Health status          | Compliance Assessment                                                                    | Intervention   | Control 1      | Control 2 | Biomarkers                                                                                                                                                                                                                                                                                                                                   | RoB           |
|--------------------------------------|--------------------|----------|------------------------|------------------------------------------------------------------------------------------|----------------|----------------|-----------|----------------------------------------------------------------------------------------------------------------------------------------------------------------------------------------------------------------------------------------------------------------------------------------------------------------------------------------------|---------------|
| Marckmann 1994[70] Denmark Crossover | 52.5<br>5          | 52       | Healthy                | Meals provided and supervised                                                            | Healthy Nordic | Average Danish | N/A       | *median, n<25<br><br>Dietary guidelines-based<br>TG: 1.11 (0.74, 1.23) mmol/L<br>TC: 4.71 (3.82, 5.2) mmol/L<br>LDL-c: 2.77 (2.44, 3.35) mmol/ L<br>HDL-c: 1.08 (0.99, 1.36) mmol/ L<br><br>Western habitual<br>TG: 0.86 (0.76, 1.23)<br>TC: 5.13 (4.31, 5.44) mmol/L<br>LDL-c: 3.04 (2.57, 3.59) mmol/ L<br>HDL-c: 1.24 (1.1, 1.53) mmol/ L | Low           |
| Runchey 2012[71] USA Crossover       | 29.6<br>8.2        | 50       | 64% overweight / obese | Meals were provided and supervised; unconsumed food returned; daily consumption recorded | Low GL         | High GL        | N/A       | *geometric mean<br><br>Low GI/GL<br>Glucose: 5 (4.94, 5.06) mmol/L<br>Insulin: 8.2 (7.5, 9) mU/L<br>HOMA-IR: 1.82 (1.66, 2.01)<br><br>High GI/GL<br>Glucose: 4.92 (4.86, 4.98) mmol/L<br>Insulin: 8.3 (7.6, 9.1) mU/L<br>HOMA-IR: 1.82 (1.66, 2.01)                                                                                          | Some concerns |

| Reference                                       | Age<br>(year)<br>mean<br>SD | %<br>Female | Health status             | Compliance<br>Assessment                            | Intervention                                       | Control 1  | Control 2 | Biomarkers                                                                                                                                                                                                                                                                                                             | RoB              |
|-------------------------------------------------|-----------------------------|-------------|---------------------------|-----------------------------------------------------|----------------------------------------------------|------------|-----------|------------------------------------------------------------------------------------------------------------------------------------------------------------------------------------------------------------------------------------------------------------------------------------------------------------------------|------------------|
| Santiago-Torres<br>2016[57]<br>USA<br>Crossover | 27<br>8                     | 100         | Healthy                   | Daily<br>checkoff<br>forms;<br>leftover<br>weighted | Traditional<br>Mexican                             | US         | N/A       | *geometric mean<br><br>Traditional Mexican<br>CRP: 0.93 (0.68, 1.25) mg/L<br>IL-6: 1.32 (1.13, 1.54) pg/mL<br>Insulin: 8.03 ± 3.07 mU/L<br>HOMA-IR: 1.75 (1.56, 1.96)<br><br>Western habitual<br>CRP: 0.94 (0.7, 1.28) mg/L<br>IL-6: 1.36 (1.16, 1.58) pg/mL<br>Insulin: 9.29 ± 3.47 mU/L<br>HOMA-IR: 2.05 (1.82, 2.3) | Some<br>concerns |
| Tinker<br>2008[72]<br>USA<br>Parallel           | 62.2<br>6.9                 | 100         | Healthy<br>postmenopausal | FFQ                                                 | Low fat high<br>fruit, vegetables,<br>whole grains | Usual diet | N/A       | *geometric mean<br><br>Low fat<br>Glucose: 5.13 ± 0.6 mmol/L<br>Insulin: 8.9 ± 4.3 uU/mL<br>HOMA-IR: 2 ± 1.1<br><br>Western habitual<br>Glucose: 5.23 ± 0.74 mmol/L<br>Insulin: 9.6 ± 4.9 uU/mL<br>HOMA-IR: 2.2 ± 1.3                                                                                                  | Some<br>concerns |

*Abbreviations:* CRP, C-reactive protein; DASH, dietary approaches to stop hypertension; FFQ, food frequency questionnaire; GI, glycemic index; GL, glycemic load; HDL-c, high density lipoprotein cholesterol; HOMA-IR, homeostatic model assessment for insulin resistance; hsCRP, high sensitivity C-reactive protein; IL-6, interleukin-6; LDL-c, low density lipoprotein cholesterol; RoB, risk of bias; TC, total cholesterol; TG, triglycerides; US, United States

**Supplementary Table S4.** Risk of bias (RoB) for individual studies

| <b>Author, Year<br/>Country<br/>Design</b>     | <b>Randomisation<br/>process</b> | <b>Deviations from the<br/>intended interventions</b> | <b>Missing<br/>outcome data</b> | <b>Measurement of<br/>the outcome</b> | <b>Selection of the<br/>reported result</b> | <b>Overall RoB</b> |
|------------------------------------------------|----------------------------------|-------------------------------------------------------|---------------------------------|---------------------------------------|---------------------------------------------|--------------------|
| Abedi 2010[1]<br>Iran<br>Parallel              | Some concerns                    | Low                                                   | Low                             | Low                                   | Low                                         | Some concerns      |
| Adamsson 2010[2]<br>Sweden<br>Parallel         | Some concerns                    | Low                                                   | Low                             | Low                                   | Low                                         | Some concerns      |
| Ambring 2006[3]<br>Sweden<br>Crossover         | Some concerns                    | Low                                                   | Low                             | Low                                   | Low                                         | Some concerns      |
| Blomquist 2017[4]<br>Sweden<br>Parallel        | Some concerns                    | Low                                                   | Low                             | Low                                   | Low                                         | Some concerns      |
| Bos 2010[5]<br>the Netherlands<br>Parallel     | Some concerns                    | Low                                                   | Low                             | Low                                   | Low                                         | Some concerns      |
| Botero 2009[6]<br>USA<br>Crossover             | Low                              | Low                                                   | Low                             | Low                                   | Low                                         | Low                |
| Bouché 2002[7]<br>France<br>Crossover          | Some concerns                    | Low                                                   | Low                             | Low                                   | Low                                         | Some concerns      |
| Bravo-Herrera<br>2004[8]<br>Spain<br>Crossover | High                             | Low                                                   | Low                             | Low                                   | Low                                         | High               |
| Brynes 2003[9]<br>UK<br>Crossover              | Some concerns                    | Low                                                   | Low                             | Low                                   | Low                                         | Some concerns      |



| <b>Author, Year<br/>Country<br/>Design</b>     | <b>Randomisation<br/>process</b> | <b>Deviations from the<br/>intended interventions</b> | <b>Missing<br/>outcome data</b> | <b>Measurement of<br/>the outcome</b> | <b>Selection of the<br/>reported result</b> | <b>Overall RoB</b> |
|------------------------------------------------|----------------------------------|-------------------------------------------------------|---------------------------------|---------------------------------------|---------------------------------------------|--------------------|
| Casas 2014[10]<br>Spain<br>Parallel            | High                             | Low                                                   | Low                             | Low                                   | Low                                         | High               |
| Casas 2016[11]<br>Spain<br>Parallel            | High                             | Low                                                   | Low                             | Low                                   | Low                                         | High               |
| Casas 2017[12]<br>Spain<br>Parallel            | High                             | Low                                                   | Low                             | Low                                   | Low                                         | High               |
| Chen 2010[13]<br>USA<br>DASH-Trial<br>Parallel | Some concerns                    | Low                                                   | Low                             | Low                                   | Low                                         | Some concerns      |
| Clapp 2007[14]<br>USA<br>Crossover             | Some concerns                    | Low                                                   | Low                             | Low                                   | Low                                         | Some concerns      |
| Cooper 1982[15]<br>USA<br>Crossover            | Some concerns                    | Low                                                   | Low                             | Low                                   | Low                                         | Some concerns      |
| Dansinger 2005[16]<br>USA<br>Parallel          | Low                              | Low                                                   | Low                             | Low                                   | Low                                         | Low                |
| Davis 2017[17]<br>Australia<br>Parallel        | Some concerns                    | Low                                                   | Low                             | Low                                   | Low                                         | Some concerns      |
| de Rougemont<br>2007[18]<br>France<br>Parallel | Some concerns                    | Low                                                   | Low                             | Low                                   | Low                                         | Some concerns      |
| Djuric 2009[19]<br>USA<br>Parallel             | Some concerns                    | Low                                                   | Low                             | Low                                   | Low                                         | Some concerns      |

| <b>Author, Year<br/>Country<br/>Design</b>      | <b>Randomisation<br/>process</b> | <b>Deviations from the<br/>intended interventions</b> | <b>Missing<br/>outcome data</b> | <b>Measurement of<br/>the outcome</b> | <b>Selection of the<br/>reported result</b> | <b>Overall RoB</b> |
|-------------------------------------------------|----------------------------------|-------------------------------------------------------|---------------------------------|---------------------------------------|---------------------------------------------|--------------------|
| Due 2008[20]<br>Denmark<br>Parallel             | Low                              | Low                                                   | Low                             | Low                                   | Low                                         | Low                |
| Fernández-Real<br>2012[21]<br>Spain<br>Parallel | High                             | Low                                                   | Low                             | Low                                   | Low                                         | High               |
| Fuentes 2008[22]<br>Spain<br>Crossover          | Some concerns                    | Low                                                   | Low                             | Low                                   | Low                                         | Some concerns      |
| Gardner 2005[23]<br>USA<br>Parallel             | Low                              | Low                                                   | Low                             | Low                                   | Low                                         | Low                |
| Gardner 2007[24]<br>USA<br>Parallel             | Low                              | Low                                                   | Low                             | Low                                   | Low                                         | Low                |
| Genoni 2016[25]<br>Australia<br>Parallel        | Low                              | Low                                                   | Low                             | Low                                   | Low                                         | Low                |
| Hinderliter 2011[26]<br>USA<br>Parallel         | Some concerns                    | Low                                                   | Low                             | Low                                   | Low                                         | Some concerns      |
| Howard 2006[27]<br>USA<br>Parallel              | Some concerns                    | Low                                                   | Low                             | Low                                   | Low                                         | Some concerns      |
| Hunt 1998[28]<br>USA<br>Crossover               | Some concerns                    | Low                                                   | Low                             | Low                                   | Low                                         | Some concerns      |
| Hunt 1999[29]<br>USA<br>Crossover               | Some concerns                    | Low                                                   | Low                             | Low                                   | Low                                         | Some concerns      |

| <b>Author, Year<br/>Country<br/>Design</b>       | <b>Randomisation<br/>process</b> | <b>Deviations from the<br/>intended interventions</b> | <b>Missing<br/>outcome data</b> | <b>Measurement of<br/>the outcome</b> | <b>Selection of the<br/>reported result</b> | <b>Overall RoB</b> |
|--------------------------------------------------|----------------------------------|-------------------------------------------------------|---------------------------------|---------------------------------------|---------------------------------------------|--------------------|
| Jenkins 1987[30]<br>Canada<br>Crossover          | Some concerns                    | Low                                                   | Low                             | Low                                   | Low                                         | Some concerns      |
| Jensen 2008[31]<br>Denmark<br>Parallel           | Some concerns                    | Low                                                   | Low                             | Low                                   | Low                                         | Some concerns      |
| Kahleova 2018[32]<br>USA<br>Parallel             | Low                              | Low                                                   | Low                             | Low                                   | Low                                         | Low                |
| Kestin 1989[33]<br>Australia<br>Crossover        | Low                              | Low                                                   | Low                             | Low                                   | Low                                         | Low                |
| Kim 2017[34]<br>Australia<br>Crossover           | Low                              | Low                                                   | Low                             | Low                                   | Low                                         | Low                |
| Konstantinidou<br>2010[35]<br>Spain<br>Parallel  | Some concerns                    | Low                                                   | Low                             | Low                                   | Low                                         | Some concerns      |
| Ling 1992[36]<br>Finland<br>Parallel             | Some concerns                    | Low                                                   | Low                             | Low                                   | Low                                         | Some concerns      |
| Marin 2011 <sup>[37]</sup><br>Spain<br>Crossover | Some concerns                    | Low                                                   | Low                             | Low                                   | Low                                         | Some concerns      |
| Mellberg 2014[38]<br>Sweden<br>Parallel          | Low                              | Low                                                   | Low                             | Low                                   | Low                                         | Low                |
| Meslier 2020[39]<br>Italy<br>Parallel            | Some concerns                    | Low                                                   | Low                             | Low                                   | Low                                         | Some concerns      |

| <b>Author, Year<br/>Country<br/>Design</b>      | <b>Randomisation<br/>process</b> | <b>Deviations from the<br/>intended interventions</b> | <b>Missing<br/>outcome data</b> | <b>Measurement of<br/>the outcome</b> | <b>Selection of the<br/>reported result</b> | <b>Overall RoB</b> |
|-------------------------------------------------|----------------------------------|-------------------------------------------------------|---------------------------------|---------------------------------------|---------------------------------------------|--------------------|
| Miller 2005[40]<br>USA<br>Parallel              | Some concerns                    | Low                                                   | Low                             | Low                                   | Low                                         | Some concerns      |
| Miller 2009[41]<br>USA<br>Crossover             | Some concerns                    | Low                                                   | Low                             | Low                                   | Low                                         | Some concerns      |
| Mishra 2013[42]<br>USA<br>Parallel              | Low                              | Low                                                   | Low                             | Low                                   | Low                                         | Low                |
| Mohammadshahi<br>2014[43]<br>Iran<br>Parallel   | Low                              | Low                                                   | Low                             | Low                                   | Low                                         | Low                |
| Morgantini 2018[44]<br>Italy<br>Crossover       | Some concerns                    | Low                                                   | Low                             | Low                                   | Low                                         | Some concerns      |
| Newhouser 2012[45]<br>USA<br>Crossover          | Some concerns                    | Low                                                   | Low                             | Low                                   | Low                                         | Some concerns      |
| Nowson 2005[46]<br>Australia<br>Parallel        | Some concerns                    | Low                                                   | Low                             | Low                                   | Low                                         | Some concerns      |
| Paniagua 2007[47]<br>Spain<br>Crossover         | Some concerns                    | Low                                                   | Low                             | Low                                   | Low                                         | Some concerns      |
| Pérez-Jiménez<br>2001[48]<br>Spain<br>Crossover | High                             | Low                                                   | Low                             | Low                                   | Low                                         | High               |

| <b>Author, Year<br/>Country<br/>Design</b>       | <b>Randomisation<br/>process</b> | <b>Deviations from the<br/>intended interventions</b> | <b>Missing<br/>outcome data</b> | <b>Measurement of<br/>the outcome</b> | <b>Selection of the<br/>reported result</b> | <b>Overall RoB</b> |
|--------------------------------------------------|----------------------------------|-------------------------------------------------------|---------------------------------|---------------------------------------|---------------------------------------------|--------------------|
| Perez-Martinez<br>2006[49]<br>Spain<br>Crossover | Some concerns                    | Low                                                   | Low                             | Low                                   | Low                                         | Some concerns      |
| Poulsen 2014[50]<br>Denmark<br>Parallel          | Low                              | Low                                                   | Low                             | Low                                   | Low                                         | Low                |
| Rallidis 2009[51]<br>Greece<br>Parallel          | Some concerns                    | Low                                                   | Low                             | Low                                   | Low                                         | Some concerns      |
| Rallidis 2017[52]<br>Greece<br>Parallel          | Some concerns                    | Low                                                   | Low                             | Low                                   | Low                                         | Some concerns      |
| Reidlinger 2015[53]<br>UK<br>Parallel            | Low                              | Low                                                   | Low                             | Low                                   | Low                                         | Low                |
| Retterstøl 2018[54]<br>Norway<br>Parallel        | Some concerns                    | Low                                                   | Low                             | Low                                   | Low                                         | Some concerns      |
| Roussell 2012[55]<br>USA<br>Crossover            | Some concerns                    | Low                                                   | Low                             | Low                                   | Low                                         | Some concerns      |
| Sacks 2014[56]<br>USA<br>Crossover               | Low                              | Low                                                   | Low                             | Low                                   | Low                                         | Low                |
| Santiago-Torres<br>2016[57]<br>USA<br>Crossover  | Some concerns                    | Low                                                   | Low                             | Low                                   | Low                                         | Some concerns      |
| Shikany 2009[58]<br>USA<br>Crossover             | Low                              | Low                                                   | Low                             | Low                                   | Low                                         | Low                |

| <b>Author, Year<br/>Country<br/>Design</b>                                         | <b>Randomisation<br/>process</b> | <b>Deviations from the<br/>intended interventions</b> | <b>Missing<br/>outcome data</b> | <b>Measurement of<br/>the outcome</b> | <b>Selection of the<br/>reported result</b> | <b>Overall RoB</b> |
|------------------------------------------------------------------------------------|----------------------------------|-------------------------------------------------------|---------------------------------|---------------------------------------|---------------------------------------------|--------------------|
| Singh 2002[59]<br>India<br>Parallel                                                | Some concerns                    | Low                                                   | Low                             | Low                                   | Low                                         | Some concerns      |
| Stomby 2015[60]<br>Sweden<br>Parallel                                              | Low                              | Low                                                   | Low                             | Low                                   | Low                                         | Low                |
| Tuomainen 2019[61]<br>Nordic (Finland,<br>Sweden, Denmark,<br>Iceland)<br>Parallel | Some concerns                    | Low                                                   | Low                             | Low                                   | Low                                         | Some concerns      |
| Uusitupa 2013[62]<br>Nordic (Finland,<br>Sweden, Denmark,<br>Iceland)<br>Parallel  | Some concerns                    | Some concerns                                         | Some concerns                   | Low                                   | Low                                         | High               |
| Vincent-Baudry<br>2005[63]<br>France<br>Parallel                                   | Some concerns                    | Low                                                   | Low                             | Low                                   | Low                                         | Some concerns      |
| Vitale 2021[64]<br>Italy<br>Parallel                                               | Low                              | Low                                                   | Low                             | Low                                   | Low                                         | Low                |
| Wade 2018[65]<br>Australia<br>Crossover                                            | Low                              | Low                                                   | Low                             | Low                                   | Low                                         | Low                |
| Wade 2019[66]<br>Australia<br>Crossover                                            | Low                              | Low                                                   | Low                             | Low                                   | Low                                         | Low                |
| Wardle 2000[67]<br>UK<br>Parallel                                                  | Low                              | Low                                                   | Low                             | Low                                   | Low                                         | Low                |

| <b>Author, Year<br/>Country<br/>Design</b>    | <b>Randomisation<br/>process</b> | <b>Deviations from the<br/>intended interventions</b> | <b>Missing<br/>outcome data</b> | <b>Measurement of<br/>the outcome</b> | <b>Selection of the<br/>reported result</b> | <b>Overall RoB</b> |
|-----------------------------------------------|----------------------------------|-------------------------------------------------------|---------------------------------|---------------------------------------|---------------------------------------------|--------------------|
| Wright 2017[68]<br>New Zealand<br>Parallel    | Low                              | Low                                                   | Low                             | Low                                   | Low                                         | Low                |
| Studies excluded from quantitative syntheses  |                                  |                                                       |                                 |                                       |                                             |                    |
| Jurascheck 2020[69]<br>USA<br>Parallel        | Some concerns                    | Low                                                   | Low                             | Low                                   | Low                                         | Some concerns      |
| Marckmann<br>1994[70]<br>Denmark<br>Crossover | Low                              | Low                                                   | Low                             | Low                                   | Low                                         | Low                |
| Runchey 2012[71]<br>USA<br>Crossover          | Some concerns                    | Low                                                   | Low                             | Low                                   | Low                                         | Some concerns      |
| Tinker 2008[72]<br>USA<br>Parallel            | Some concerns                    | Low                                                   | Low                             | Low                                   | Low                                         | Some concerns      |

**Supplementary Table S5.** League table for HDL-c showing comparative effect sizes between dietary patterns<sup>1</sup>

|                                       |                                       |                        |                                       |                        |                                       |                                       |                                   |                        |                                   |
|---------------------------------------|---------------------------------------|------------------------|---------------------------------------|------------------------|---------------------------------------|---------------------------------------|-----------------------------------|------------------------|-----------------------------------|
| <i>Mediterranean</i>                  |                                       |                        |                                       |                        |                                       |                                       |                                   |                        |                                   |
| <b>0.07</b><br><b>(0.00, 0.14)</b>    | <i>DASH</i>                           |                        |                                       |                        |                                       |                                       |                                   |                        |                                   |
| -0.07<br>(-0.21, 0.08)                | -0.14<br>(-0.29, 0.01)                | <i>Paleo</i>           |                                       |                        |                                       |                                       |                                   |                        |                                   |
| 0.04<br>(-0.01, 0.09)                 | -0.03<br>(-0.10, 0.03)                | 0.11<br>(-0.03, 0.24)  | <i>DG-based</i>                       |                        |                                       |                                       |                                   |                        |                                   |
| 0.02<br>(-0.23, 0.27)                 | -0.05<br>(-0.30, 0.20)                | 0.09<br>(-0.19, 0.37)  | -0.02<br>(-0.26, 0.23)                | <i>Low GI/GL</i>       |                                       |                                       |                                   |                        |                                   |
| <b>0.07</b><br><b>(0.02, 0.13)</b>    | 0.00<br>(-0.07, 0.07)                 | 0.14<br>(-0.01, 0.29)  | 0.03<br>(-0.03, 0.10)                 | 0.05<br>(-0.20, 0.30)  | <i>Plant-based</i>                    |                                       |                                   |                        |                                   |
| <b>0.05</b><br><b>(0.00, 0.10)</b>    | -0.02<br>(-0.09, 0.05)                | 0.12<br>(-0.03, 0.27)  | 0.01<br>(-0.04, 0.07)                 | 0.03<br>(-0.22, 0.28)  | -0.02<br>(-0.08, 0.04)                | <i>Low fat</i>                        |                                   |                        |                                   |
| <b>-0.12</b><br><b>(-0.22, -0.02)</b> | <b>-0.19</b><br><b>(-0.30, -0.08)</b> | -0.05<br>(-0.22, 0.12) | <b>-0.16</b><br><b>(-0.26, -0.05)</b> | -0.14<br>(-0.40, 0.12) | <b>-0.19</b><br><b>(-0.29, -0.09)</b> | <b>-0.17</b><br><b>(-0.28, -0.06)</b> | <i>Low CHO</i><br><i>high fat</i> |                        |                                   |
| -0.00<br>(-0.25, 0.24)                | -0.07<br>(-0.32, 0.18)                | 0.07<br>(-0.21, 0.35)  | -0.04<br>(-0.29, 0.21)                | -0.02<br>(-0.08, 0.03) | -0.07<br>(-0.32, 0.17)                | -0.05<br>(-0.30, 0.19)                | 0.12<br>(-0.15, 0.38)             | <i>High GI/GL</i>      |                                   |
| -0.03<br>(-0.07, 0.01)                | <b>-0.10</b><br><b>(-0.15, -0.04)</b> | 0.04<br>(-0.10, 0.19)  | <b>-0.06</b><br><b>(-0.11, -0.02)</b> | -0.05<br>(-0.29, 0.20) | <b>-0.10</b><br><b>(-0.14, -0.05)</b> | <b>-0.08</b><br><b>(-0.12, -0.03)</b> | 0.09<br>(-0.01, 0.19)             | -0.02<br>(-0.27, 0.22) | <i>Western</i><br><i>habitual</i> |

<sup>1</sup>The values correspond to the mean difference (95% CI) in HDL-c (mmol/L) between the column dietary pattern and the row dietary pattern; column minus row. Values in bold are effect sizes that are statistically significant at level of 0.05. Darker shading corresponds to higher confidence in CINeMA (Confidence in Network Meta-Analysis) rating.

*Abbreviations:* CHO, carbohydrate; DASH, Dietary Approaches to Stop Hypertension; DG, dietary guidelines; GI/GL, glycemic index/glycemic load



**Supplementary Table S6.** League table for total cholesterol showing comparative effect sizes between dietary patterns<sup>1</sup>

|                                       |                                       |                        |                                       |                        |                                       |                                       |                             |                        |                             |
|---------------------------------------|---------------------------------------|------------------------|---------------------------------------|------------------------|---------------------------------------|---------------------------------------|-----------------------------|------------------------|-----------------------------|
| <i>Mediterranean</i>                  |                                       |                        |                                       |                        |                                       |                                       |                             |                        |                             |
| 0.06<br>(-0.24, 0.36)                 | <i>DASH</i>                           |                        |                                       |                        |                                       |                                       |                             |                        |                             |
| -0.25<br>(-0.80, 0.29)                | -0.31<br>(-0.89, 0.26)                | <i>Paleo</i>           |                                       |                        |                                       |                                       |                             |                        |                             |
| -0.06<br>(-0.28, 0.16)                | -0.12<br>(-0.41, 0.17)                | 0.20<br>(-0.30, 0.69)  | <i>DG-based</i>                       |                        |                                       |                                       |                             |                        |                             |
| -0.13<br>(-0.94, 0.67)                | -0.19<br>(-1.02, 0.64)                | 0.12<br>(-0.83, 1.07)  | -0.07<br>(-0.88, 0.74)                | <i>Low GI/GL</i>       |                                       |                                       |                             |                        |                             |
| 0.06<br>(-0.19, 0.31)                 | 0.00<br>(-0.33, 0.33)                 | 0.31<br>(-0.25, 0.88)  | 0.12<br>(-0.14, 0.38)                 | 0.19<br>(-0.62, 1.01)  | <i>Plant-based</i>                    |                                       |                             |                        |                             |
| 0.04<br>(-0.14, 0.23)                 | -0.02<br>(-0.32, 0.29)                | 0.30<br>(-0.26, 0.85)  | 0.10<br>(-0.14, 0.35)                 | 0.17<br>(-0.64, 0.99)  | -0.02<br>(-0.27, 0.24)                | <i>Low fat</i>                        |                             |                        |                             |
| <b>-0.42</b><br><b>(-0.83, -0.01)</b> | <b>-0.48</b><br><b>(-0.94, -0.01)</b> | -0.16<br>(-0.82, 0.49) | -0.36<br>(-0.78, 0.07)                | -0.29<br>(-1.17, 0.59) | <b>-0.48</b><br><b>(-0.87, -0.08)</b> | <b>-0.46</b><br><b>(-0.88, -0.04)</b> | <i>Low CHO<br/>high fat</i> |                        |                             |
| -0.27<br>(-1.07, 0.54)                | -0.33<br>(-1.16, 0.51)                | -0.01<br>(-0.96, 0.94) | -0.21<br>(-1.02, 0.60)                | -0.13<br>(-0.44, 0.17) | -0.33<br>(-1.14, 0.49)                | -0.31<br>(-1.12, 0.50)                | 0.15<br>(-0.73, 1.03)       | <i>High GI/GL</i>      |                             |
| <b>-0.30</b><br><b>(-0.46, -0.14)</b> | <b>-0.36</b><br><b>(-0.62, -0.10)</b> | -0.04<br>(-0.57, 0.49) | <b>-0.24</b><br><b>(-0.42, -0.06)</b> | -0.17<br>(-0.96, 0.62) | <b>-0.36</b><br><b>(-0.56, -0.15)</b> | <b>-0.34</b><br><b>(-0.53, -0.15)</b> | 0.12<br>(-0.27, 0.51)       | -0.03<br>(-0.82, 0.76) | <i>Western<br/>habitual</i> |

<sup>1</sup>The values correspond to the mean difference (95% CI) in total cholesterol (mmol/L) between the column dietary pattern and the row dietary pattern; column minus row. Values in bold are effect sizes that are statistically significant at level of 0.05. Darker shading corresponds to higher confidence in CINeMA (Confidence in Network Meta-Analysis) rating.

*Abbreviations:* CHO, carbohydrate; DASH, Dietary Approaches to Stop Hypertension; DG, dietary guidelines; GI/GL, glycemic index/glycemic load

**Supplementary Table S7.** League table for triglycerides showing comparative effect sizes between dietary patterns<sup>1</sup>

|                        |                        |                        |                        |                        |                                    |                        |                             |                       |                             |
|------------------------|------------------------|------------------------|------------------------|------------------------|------------------------------------|------------------------|-----------------------------|-----------------------|-----------------------------|
| <i>Mediterranean</i>   |                        |                        |                        |                        |                                    |                        |                             |                       |                             |
| -0.01<br>(-0.15, 0.13) | <i>DASH</i>            |                        |                        |                        |                                    |                        |                             |                       |                             |
| -0.04<br>(-0.24, 0.15) | -0.03<br>(-0.25, 0.19) | <i>Paleo</i>           |                        |                        |                                    |                        |                             |                       |                             |
| -0.05<br>(-0.15, 0.04) | -0.04<br>(-0.18, 0.10) | -0.01<br>(-0.18, 0.16) | <i>DG-based</i>        |                        |                                    |                        |                             |                       |                             |
| -0.21<br>(-0.70, 0.29) | -0.20<br>(-0.70, 0.31) | -0.17<br>(-0.69, 0.36) | -0.16<br>(-0.65, 0.34) | <i>Low GI/GL</i>       |                                    |                        |                             |                       |                             |
| -0.09<br>(-0.20, 0.01) | -0.08<br>(-0.23, 0.07) | -0.05<br>(-0.25, 0.15) | -0.04<br>(-0.15, 0.07) | 0.12<br>(-0.38, 0.62)  | <i>Plant-based</i>                 |                        |                             |                       |                             |
| -0.05<br>(-0.13, 0.04) | -0.03<br>(-0.18, 0.11) | -0.01<br>(-0.20, 0.19) | 0.00<br>(-0.10, 0.11)  | 0.16<br>(-0.33, 0.66)  | 0.04<br>(-0.06, 0.15)              | <i>Low fat</i>         |                             |                       |                             |
| 0.13<br>(-0.09, 0.34)  | 0.14<br>(-0.10, 0.39)  | 0.17<br>(-0.11, 0.45)  | 0.18<br>(-0.04, 0.40)  | 0.34<br>(-0.19, 0.87)  | <b>0.22</b><br><b>(0.01, 0.44)</b> | 0.18<br>(-0.05, 0.40)  | <i>Low CHO<br/>high fat</i> |                       |                             |
| -0.26<br>(-0.75, 0.24) | -0.25<br>(-0.75, 0.26) | -0.22<br>(-0.74, 0.31) | -0.21<br>(-0.70, 0.29) | -0.05<br>(-0.15, 0.06) | -0.17<br>(-0.66, 0.33)             | -0.21<br>(-0.71, 0.29) | -0.39<br>(-0.92, 0.15)      | <i>High GI/GL</i>     |                             |
| -0.03<br>(-0.10, 0.04) | -0.02<br>(-0.15, 0.11) | 0.01<br>(-0.18, 0.20)  | 0.02<br>(-0.06, 0.10)  | 0.18<br>(-0.31, 0.67)  | 0.06<br>(-0.03, 0.15)              | 0.01<br>(-0.07, 0.10)  | -0.16<br>(-0.37, 0.05)      | 0.22<br>(-0.27, 0.71) | <i>Western<br/>habitual</i> |

<sup>1</sup>The values correspond to the mean difference (95% CI) in triglycerides (mmol/L) between the column dietary pattern and the row dietary pattern; column minus row. Values in bold are effect sizes that are statistically significant at level of 0.05.

*Abbreviations:* CHO, carbohydrate; DASH, Dietary Approaches to Stop Hypertension; DG, dietary guidelines; GI/GL, glycemic index/glycemic load

**Supplementary Table S8.** League table for ApoB showing comparative effect sizes between dietary patterns<sup>1</sup>

|                                       |                                       |                                       |                                       |                                       |                                   |                         |
|---------------------------------------|---------------------------------------|---------------------------------------|---------------------------------------|---------------------------------------|-----------------------------------|-------------------------|
| <i>Mediterranean</i>                  |                                       |                                       |                                       |                                       |                                   |                         |
| 0.02<br>(-0.08, 0.12)                 | <i>DASH</i>                           |                                       |                                       |                                       |                                   |                         |
| 0.00<br>(-0.07, 0.07)                 | -0.02<br>(-0.09, 0.05)                | <i>DG-based</i>                       |                                       |                                       |                                   |                         |
| -0.02<br>(-0.09, 0.05)                | -0.04<br>(-0.14, 0.06)                | -0.02<br>(-0.10, 0.06)                | <i>Plant-based</i>                    |                                       |                                   |                         |
| 0.01<br>(-0.03, 0.05)                 | -0.01<br>(-0.11, 0.09)                | 0.01<br>(-0.06, 0.08)                 | 0.03<br>(-0.04, 0.10)                 | <i>Low fat</i>                        |                                   |                         |
| <b>-0.15</b><br><b>(-0.28, -0.02)</b> | <b>-0.17</b><br><b>(-0.33, -0.01)</b> | <b>-0.15</b><br><b>(-0.29, -0.01)</b> | -0.13<br>(-0.27, 0.00)                | <b>-0.16</b><br><b>(-0.30, -0.03)</b> | <i>Low CHO</i><br><i>High fat</i> |                         |
| <b>-0.09</b><br><b>(-0.13, -0.04)</b> | <b>-0.11</b><br><b>(-0.20, -0.02)</b> | <b>-0.09</b><br><b>(-0.14, -0.03)</b> | <b>-0.07</b><br><b>(-0.12, -0.01)</b> | <b>-0.10</b><br><b>(-0.15, -0.05)</b> | 0.06<br>(-0.07, 0.20)             | <i>Western habitual</i> |

<sup>1</sup>The values correspond to the mean difference (95% CI) in ApoB (g/L) between the column dietary pattern and the row dietary pattern; column minus row. Values in bold are effect sizes that are statistically significant at level of 0.05.

*Abbreviations:* CHO, carbohydrate; DASH, Dietary Approaches to Stop Hypertension; DG, dietary guidelines

**Supplementary Table S9.** League table for ApoA1 showing comparative effect sizes between dietary patterns<sup>1</sup>

|                        |                        |                        |                                       |                        |                                   |                         |
|------------------------|------------------------|------------------------|---------------------------------------|------------------------|-----------------------------------|-------------------------|
| <i>Mediterranean</i>   |                        |                        |                                       |                        |                                   |                         |
| 0.03<br>(-0.20, 0.26)  | <i>DASH</i>            |                        |                                       |                        |                                   |                         |
| 0.01<br>(-0.13, 0.15)  | -0.02<br>(-0.20, 0.16) | <i>DG-based</i>        |                                       |                        |                                   |                         |
| 0.05<br>(-0.09, 0.19)  | 0.02<br>(-0.21, 0.25)  | 0.04<br>(-0.11, 0.19)  | <i>Plant-based</i>                    |                        |                                   |                         |
| -0.01<br>(-0.10, 0.09) | -0.03<br>(-0.26, 0.19) | -0.01<br>(-0.16, 0.13) | -0.05<br>(-0.20, 0.09)                | <i>Low fat</i>         |                                   |                         |
| -0.17<br>(-0.36, 0.03) | -0.20<br>(-0.47, 0.08) | -0.18<br>(-0.39, 0.03) | <b>-0.22</b><br><b>(-0.42, -0.02)</b> | -0.16<br>(-0.36, 0.04) | <i>Low CHO</i><br><i>high fat</i> |                         |
| -0.07<br>(-0.16, 0.03) | -0.09<br>(-0.30, 0.11) | -0.07<br>(-0.18, 0.03) | -0.11<br>(-0.23, 0.00)                | -0.06<br>(-0.16, 0.04) | 0.10<br>(-0.08, 0.29)             | <i>Western habitual</i> |

<sup>1</sup>The values correspond to the mean difference (95% CI) in ApoA1 (g/L) between the column dietary pattern and the row dietary pattern; column minus row. Values in bold are effect sizes that are statistically significant at level of 0.05.

*Abbreviations:* CHO, carbohydrate; DASH, Dietary Approaches to Stop Hypertension; DG, dietary guidelines

**Supplementary Table S10.** League table for glucose showing comparative effect sizes between dietary patterns<sup>1</sup>

|                        |                        |                        |                       |                        |                        |                        |                             |                        |                        |                             |
|------------------------|------------------------|------------------------|-----------------------|------------------------|------------------------|------------------------|-----------------------------|------------------------|------------------------|-----------------------------|
| <i>Mediterranean</i>   |                        |                        |                       |                        |                        |                        |                             |                        |                        |                             |
| 0.03<br>(-0.10, 0.17)  | <i>DASH</i>            |                        |                       |                        |                        |                        |                             |                        |                        |                             |
| -0.05<br>(-0.35, 0.24) | -0.09<br>(-0.40, 0.22) | <i>Paleo</i>           |                       |                        |                        |                        |                             |                        |                        |                             |
| -0.07<br>(-0.16, 0.01) | -0.11<br>(-0.23, 0.01) | -0.02<br>(-0.31, 0.27) | <i>DG-based</i>       |                        |                        |                        |                             |                        |                        |                             |
| 0.02<br>(-0.41, 0.44)  | -0.02<br>(-0.45, 0.42) | 0.07<br>(-0.44, 0.59)  | 0.09<br>(-0.33, 0.52) | <i>Low GI/GL</i>       |                        |                        |                             |                        |                        |                             |
| 0.04<br>(-0.18, 0.26)  | 0.00<br>(-0.24, 0.25)  | 0.09<br>(-0.27, 0.45)  | 0.11<br>(-0.11, 0.33) | 0.02<br>(-0.45, 0.49)  | <i>Plant-based</i>     |                        |                             |                        |                        |                             |
| -0.00<br>(-0.09, 0.08) | -0.04<br>(-0.18, 0.11) | 0.05<br>(-0.25, 0.35)  | 0.07<br>(-0.02, 0.17) | -0.02<br>(-0.45, 0.41) | -0.04<br>(-0.27, 0.19) | <i>Low fat</i>         |                             |                        |                        |                             |
| 0.13<br>(-0.09, 0.35)  | 0.10<br>(-0.14, 0.34)  | 0.18<br>(-0.18, 0.54)  | 0.20<br>(-0.01, 0.42) | 0.11<br>(-0.36, 0.58)  | 0.09<br>(-0.15, 0.34)  | 0.13<br>(-0.09, 0.36)  | <i>Low CHO<br/>high fat</i> |                        |                        |                             |
| 0.03<br>(-0.13, 0.20)  | -0.00<br>(-0.19, 0.19) | 0.09<br>(-0.24, 0.42)  | 0.11<br>(-0.06, 0.27) | 0.02<br>(-0.43, 0.46)  | -0.00<br>(-0.26, 0.25) | 0.04<br>(-0.14, 0.21)  | -0.10<br>(-0.35, 0.16)      | <i>Mexican</i>         |                        |                             |
| 0.09<br>(-0.34, 0.51)  | 0.05<br>(-0.38, 0.49)  | 0.14<br>(-0.37, 0.66)  | 0.16<br>(-0.26, 0.59) | 0.07<br>(-0.03, 0.18)  | 0.05<br>(-0.42, 0.52)  | 0.09<br>(-0.34, 0.52)  | -0.04<br>(-0.51, 0.43)      | 0.06<br>(-0.39, 0.50)  | <i>High GI/GL</i>      |                             |
| -0.05<br>(-0.11, 0.02) | -0.08<br>(-0.20, 0.04) | 0.01<br>(-0.29, 0.30)  | 0.03<br>(-0.04, 0.09) | -0.06<br>(-0.49, 0.36) | -0.08<br>(-0.30, 0.13) | -0.04<br>(-0.13, 0.04) | -0.18<br>(-0.38, 0.03)      | -0.08<br>(-0.23, 0.07) | -0.14<br>(-0.56, 0.29) | <i>Western<br/>habitual</i> |

<sup>1</sup>The values correspond to the mean difference (95% CI) in glucose (mmol/L) between the column dietary pattern and the row dietary pattern; column minus row.

*Abbreviations:* CHO, carbohydrate; DASH, Dietary Approaches to Stop Hypertension; DG, dietary guidelines; GI/GL, glycemic index/glycemic load

**Supplementary Table S11.** League table for insulin showing comparative effect sizes between dietary patterns<sup>1</sup>

|                         |                         |                         |                         |                          |                          |                                       |                             |                       |                             |
|-------------------------|-------------------------|-------------------------|-------------------------|--------------------------|--------------------------|---------------------------------------|-----------------------------|-----------------------|-----------------------------|
| <i>Mediterranean</i>    |                         |                         |                         |                          |                          |                                       |                             |                       |                             |
| -0.27<br>(-6.02, 5.49)  | <i>DASH</i>             |                         |                         |                          |                          |                                       |                             |                       |                             |
| 0.96<br>(-5.23, 7.16)   | 1.23<br>(-6.08, 8.54)   | <i>Paleo</i>            |                         |                          |                          |                                       |                             |                       |                             |
| -0.25<br>(-3.79, 3.30)  | 0.02<br>(-5.23, 5.27)   | -1.21<br>(-6.29, 3.87)  | <i>DG-based</i>         |                          |                          |                                       |                             |                       |                             |
| -3.44<br>(-11.72, 4.83) | -3.18<br>(-12.70, 6.35) | -4.41<br>(-14.23, 5.41) | -3.20<br>(-11.60, 5.20) | <i>Low GI/GL</i>         |                          |                                       |                             |                       |                             |
| -3.48<br>(-11.06, 4.10) | -3.21<br>(-12.14, 5.71) | -4.44<br>(-13.68, 4.79) | -3.23<br>(-10.95, 4.48) | -0.03<br>(-10.74, 10.67) | <i>Plant-based</i>       |                                       |                             |                       |                             |
| 1.15<br>(-1.58, 3.89)   | 1.42<br>(-4.62, 7.45)   | 0.19<br>(-6.22, 6.60)   | 1.40<br>(-2.51, 5.30)   | 4.60<br>(-3.91, 13.10)   | 4.63<br>(-3.20, 12.46)   | <i>Low fat</i>                        |                             |                       |                             |
| -0.86<br>(-8.53, 6.82)  | -0.59<br>(-9.60, 8.42)  | -1.82<br>(-11.14, 7.50) | -0.61<br>(-8.42, 7.20)  | 2.59<br>(-8.19, 13.36)   | 2.62<br>(-4.16, 9.41)    | -2.01<br>(-9.93, 5.92)                | <i>Low CHO<br/>High fat</i> |                       |                             |
| -3.87<br>(-11.96, 4.21) | -3.61<br>(-12.97, 5.76) | -4.84<br>(-14.50, 4.82) | -3.63<br>(-11.84, 4.59) | -0.43<br>(-3.57, 2.71)   | -0.39<br>(-10.95, 10.16) | -5.02<br>(-13.35, 3.30)               | -3.02<br>(-13.65, 7.62)     | <i>High GI/GL</i>     |                             |
| -1.94<br>(-4.32, 0.44)  | -1.67<br>(-6.95, 3.61)  | -2.90<br>(-8.69, 2.89)  | -1.69<br>(-4.47, 1.09)  | 1.51<br>(-6.42, 9.43)    | 1.54<br>(-5.65, 8.73)    | <b>-3.09</b><br><b>(-6.18, -0.00)</b> | -1.08<br>(-8.38, 6.22)      | 1.94<br>(-5.79, 9.67) | <i>Western<br/>habitual</i> |

<sup>1</sup>The values correspond to the mean difference (95% CI) in insulin (mU/L) between the column dietary pattern and the row dietary pattern; column minus row. Values in bold are effect sizes that are statistically significant at level of 0.05.

*Abbreviations:* CHO, carbohydrate; DASH, Dietary Approaches to Stop Hypertension; DG, dietary guidelines; GI/GL, glycemic index/glycemic load

**Supplementary Table S12.** League table for HOMA-IR showing comparative effect sizes between dietary patterns<sup>1</sup>

|                                    |                                       |                                       |                        |                                       |                        |                        |                         |
|------------------------------------|---------------------------------------|---------------------------------------|------------------------|---------------------------------------|------------------------|------------------------|-------------------------|
| <i>Mediterranean</i>               |                                       |                                       |                        |                                       |                        |                        |                         |
| 0.76<br>(-0.03, 1.56)              | <i>Paleo</i>                          |                                       |                        |                                       |                        |                        |                         |
| 0.16<br>(-0.23, 0.56)              | -0.60<br>(-1.30, 0.10)                | <i>DG-based</i>                       |                        |                                       |                        |                        |                         |
| -0.14<br>(-1.23, 0.94)             | -0.91<br>(-2.16, 0.35)                | -0.31<br>(-1.35, 0.74)                | <i>Low GI/GL</i>       |                                       |                        |                        |                         |
| <b>0.72</b><br><b>(0.23, 1.21)</b> | -0.05<br>(-0.84, 0.75)                | <b>0.55</b><br><b>(0.16, 0.95)</b>    | 0.86<br>(-0.20, 1.92)  | <i>Plant-based</i>                    |                        |                        |                         |
| -0.03<br>(-0.33, 0.27)             | <b>-0.80</b><br><b>(-1.56, -0.03)</b> | -0.20<br>(-0.52, 0.13)                | 0.11<br>(-0.96, 1.19)  | <b>-0.75</b><br><b>(-1.21, -0.29)</b> | <i>Low fat</i>         |                        |                         |
| -0.10<br>(-1.23, 1.03)             | -0.87<br>(-2.15, 0.42)                | -0.27<br>(-1.35, 0.82)                | 0.04<br>(-0.48, 0.56)  | -0.82<br>(-1.92, 0.28)                | -0.07<br>(-1.19, 1.05) | <i>High GI/GL</i>      |                         |
| -0.18<br>(-0.56, 0.20)             | <b>-0.95</b><br><b>(-1.68, -0.21)</b> | <b>-0.35</b><br><b>(-0.59, -0.10)</b> | -0.04<br>(-1.06, 0.98) | <b>-0.90</b><br><b>(-1.21, -0.59)</b> | -0.15<br>(-0.50, 0.20) | -0.08<br>(-1.14, 0.98) | <i>Western habitual</i> |

<sup>1</sup>The values correspond to the mean difference (95% CI) in HOMA-IR between the column dietary pattern and the row dietary pattern; column minus row. Values in bold are effect sizes that are statistically significant at level of 0.05. Darker shading corresponds to higher confidence in CINeMA (Confidence in Network Meta-Analysis) rating.

*Abbreviations:* DG, dietary guidelines; GI/GL, glycemic index/glycemic load; HOMA-IR, homeostatic model assessment for insulin resistance

**Supplementary Table S13.** League table for hsCRP showing comparative effect sizes between dietary patterns<sup>1</sup>

|                        |                        |                        |                        |                        |                       |                             |                         |
|------------------------|------------------------|------------------------|------------------------|------------------------|-----------------------|-----------------------------|-------------------------|
| <i>Mediterranean</i>   |                        |                        |                        |                        |                       |                             |                         |
| 0.34<br>(-0.86, 1.53)  | <i>DASH</i>            |                        |                        |                        |                       |                             |                         |
| 0.49<br>(-0.72, 1.71)  | 0.16<br>(-1.24, 1.56)  | <i>Paleo</i>           |                        |                        |                       |                             |                         |
| 0.27<br>(-0.41, 0.95)  | -0.07<br>(-1.05, 0.91) | -0.23<br>(-1.23, 0.77) | <i>DG-based</i>        |                        |                       |                             |                         |
| -0.11<br>(-0.77, 0.55) | -0.44<br>(-1.74, 0.85) | -0.60<br>(-1.92, 0.71) | -0.37<br>(-1.22, 0.47) | <i>Plant-based</i>     |                       |                             |                         |
| -0.48<br>(-1.10, 0.14) | -0.82<br>(-2.06, 0.43) | -0.98<br>(-2.24, 0.29) | -0.75<br>(-1.51, 0.02) | -0.37<br>(-1.25, 0.51) | <i>Low fat</i>        |                             |                         |
| -0.26<br>(-0.96, 0.44) | -0.60<br>(-1.92, 0.73) | -0.76<br>(-2.10, 0.59) | -0.53<br>(-1.42, 0.36) | -0.15<br>(-0.90, 0.59) | 0.22<br>(-0.70, 1.14) | <i>Low CHO<br/>high fat</i> |                         |
| -0.24<br>(-0.66, 0.18) | -0.58<br>(-1.72, 0.56) | -0.74<br>(-1.90, 0.43) | -0.51<br>(-1.09, 0.08) | -0.13<br>(-0.76, 0.49) | 0.24<br>(-0.45, 0.93) | 0.02<br>(-0.66, 0.69)       | <i>Western habitual</i> |

<sup>1</sup>The values correspond to the mean difference (95% CI) in hsCRP (mg/L) between the column dietary pattern and the row dietary pattern; column minus row. Values in bold are effect sizes that are statistically significant at level of 0.05. Darker shading corresponds to higher confidence in CINeMA (Confidence in Network Meta-Analysis) rating.

*Abbreviations:* CHO, carbohydrate; DASH, Dietary Approaches to Stop Hypertension; DG, dietary guidelines; hsCRP, high sensitivity C-reactive protein



**Supplementary Table S14.** League table for interleukin-6 showing comparative effect sizes between dietary patterns<sup>1</sup>

|                        |                        |                        |                       |                         |
|------------------------|------------------------|------------------------|-----------------------|-------------------------|
| <i>Mediterranean</i>   |                        |                        |                       |                         |
| 1.45<br>(-0.51, 3.41)  | <i>Paleo</i>           |                        |                       |                         |
| -0.19<br>(-0.71, 0.34) | -1.64<br>(-3.53, 0.25) | <i>DG-based</i>        |                       |                         |
| -0.35<br>(-1.00, 0.30) | -1.80<br>(-3.87, 0.26) | -0.16<br>(-1.00, 0.67) | <i>Low fat</i>        |                         |
| -0.13<br>(-0.59, 0.34) | -1.58<br>(-3.48, 0.32) | 0.06<br>(-0.18, 0.30)  | 0.22<br>(-0.57, 1.02) | <i>Western habitual</i> |

<sup>1</sup>The values correspond to the mean difference (95% CI) in interleukin-6 (pg/mL) between the column dietary pattern and the row dietary pattern; column minus row. Values in bold are effect sizes that are statistically significant at level of 0.05.

*Abbreviations:* DG, dietary guidelines

**Supplementary Figure S4.** Box plot showing the distribution of participants' age across the direct comparisons for LDL-c

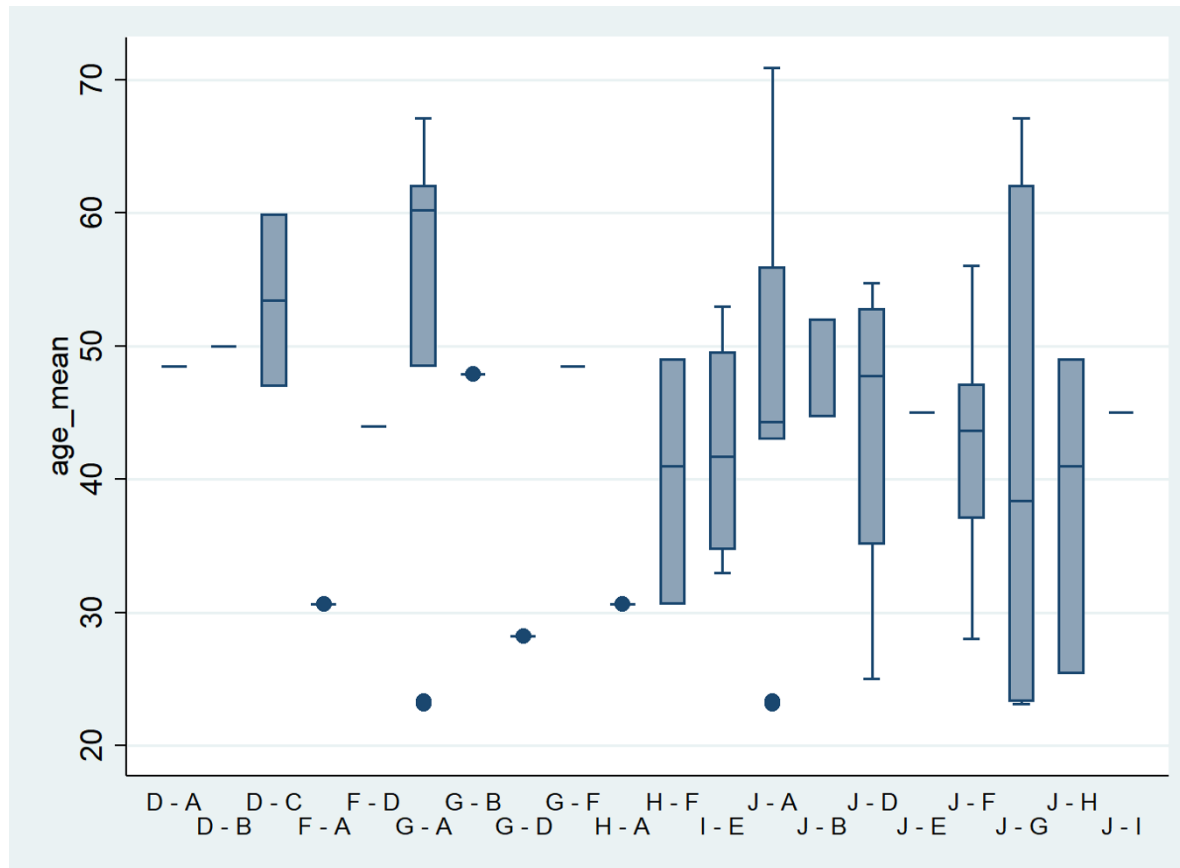

**A** = Mediterranean diet; **B** = Dietary Approaches to Stop Hypertension; **C** = Paleo diet; **D** = Dietary Guidelines-based diets; **E** = low GI / GL diet; **F** = plant-based diets; **G** = low fat diet; **H** = low carbohydrate high fat diet; **I** = high GI / GL diet; **J** = western habitual diet

The lower and upper edges of the box represent the 25<sup>th</sup> and 75<sup>th</sup> percentiles, the middle line in the box marks the 50th percentile (median), the error bars are the 95% confidence intervals, and any dots beyond the error bars are outliers.

**Supplementary Figure S5.** Box plot showing the distribution of participants' age across the direct comparisons for ApoB

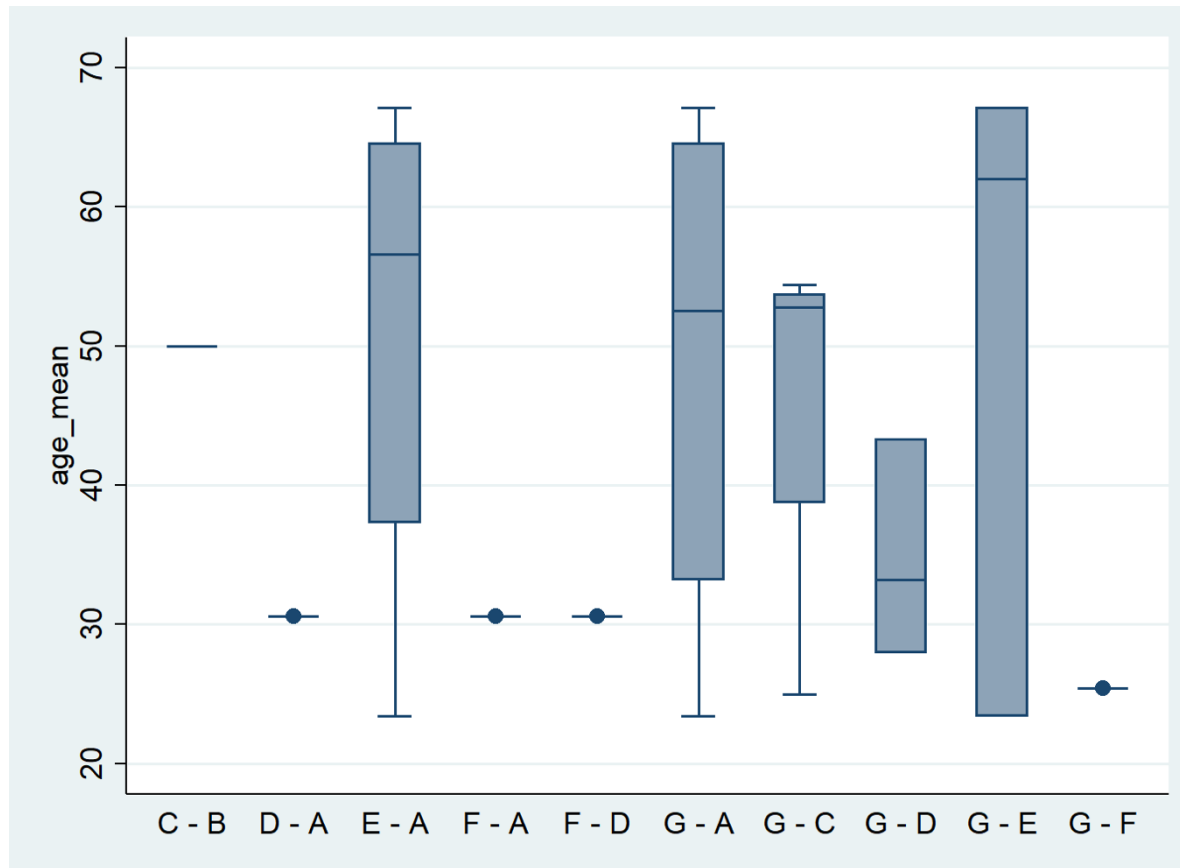

**A** = Mediterranean diet; **B** = Dietary Approaches to Stop Hypertension; **C** = Dietary Guidelines-based diets; **D** = plant-based diet; **E** = low fat diet; **F** = low carbohydrate high fat diet; **G** = western habitual diet

The lower and upper edges of the box represent the 25<sup>th</sup> and 75<sup>th</sup> percentiles, the middle line in the box marks the 50th percentile (median), the error bars are the 95% confidence intervals, and any dots beyond the error bars are outliers.

**Supplementary Figure S6.** Box plot showing the distribution of participants' age across the direct comparisons for glucose

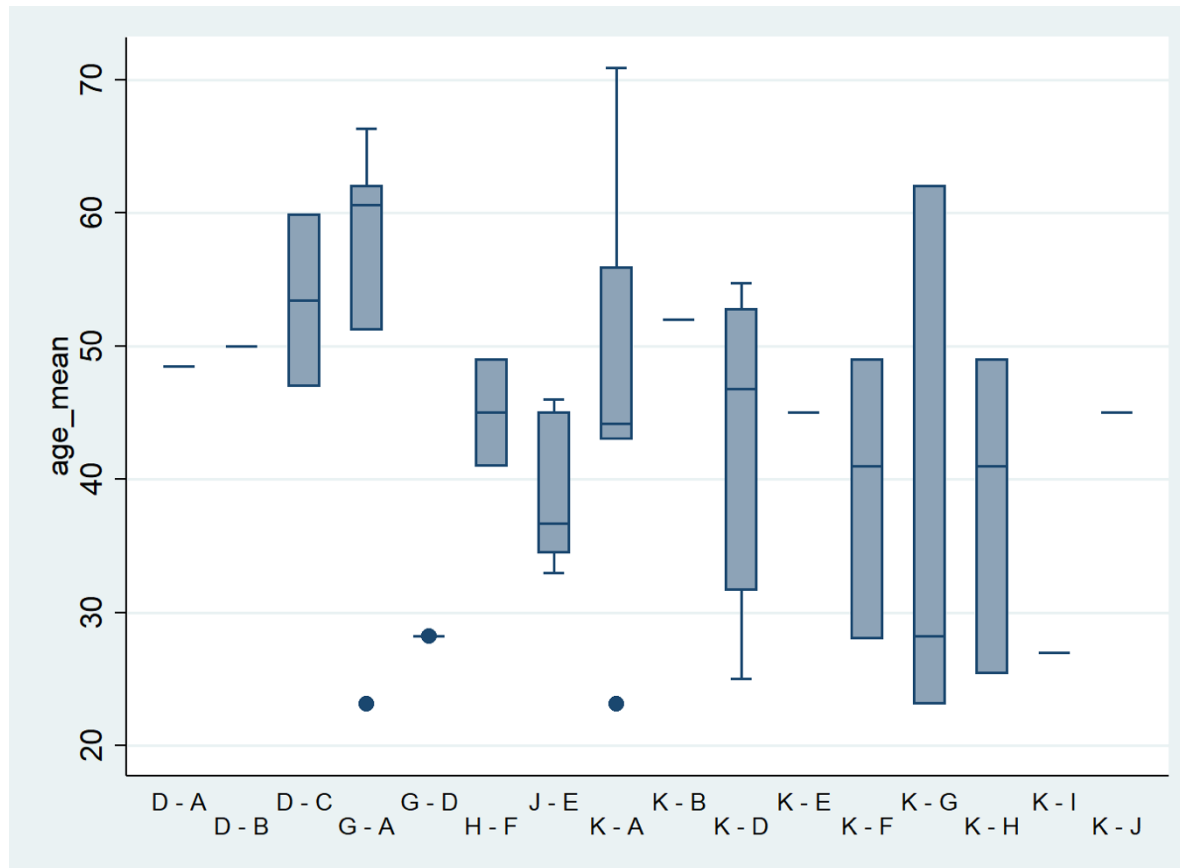

**A** = Mediterranean diet; **B** = Dietary Approaches to Stop Hypertension; **C** = Paleo diet; **D** = Dietary Guidelines-based diets; **E** = low GI / GL diet; **F** = plant-based diets; **G** = low fat diet; **H** = low carbohydrate high fat diet; **I** = traditional Mexican diet; **J** = high GI / GL diet; **K** = western habitual diet

The lower and upper edges of the box represent the 25<sup>th</sup> and 75<sup>th</sup> percentiles, the middle line in the box marks the 50th percentile (median), the error bars are the 95% confidence intervals, and any dots beyond the error bars are outliers.

**Supplementary Figure S7.** Box plot showing the distribution of participants' age across the direct comparisons for hsCRP

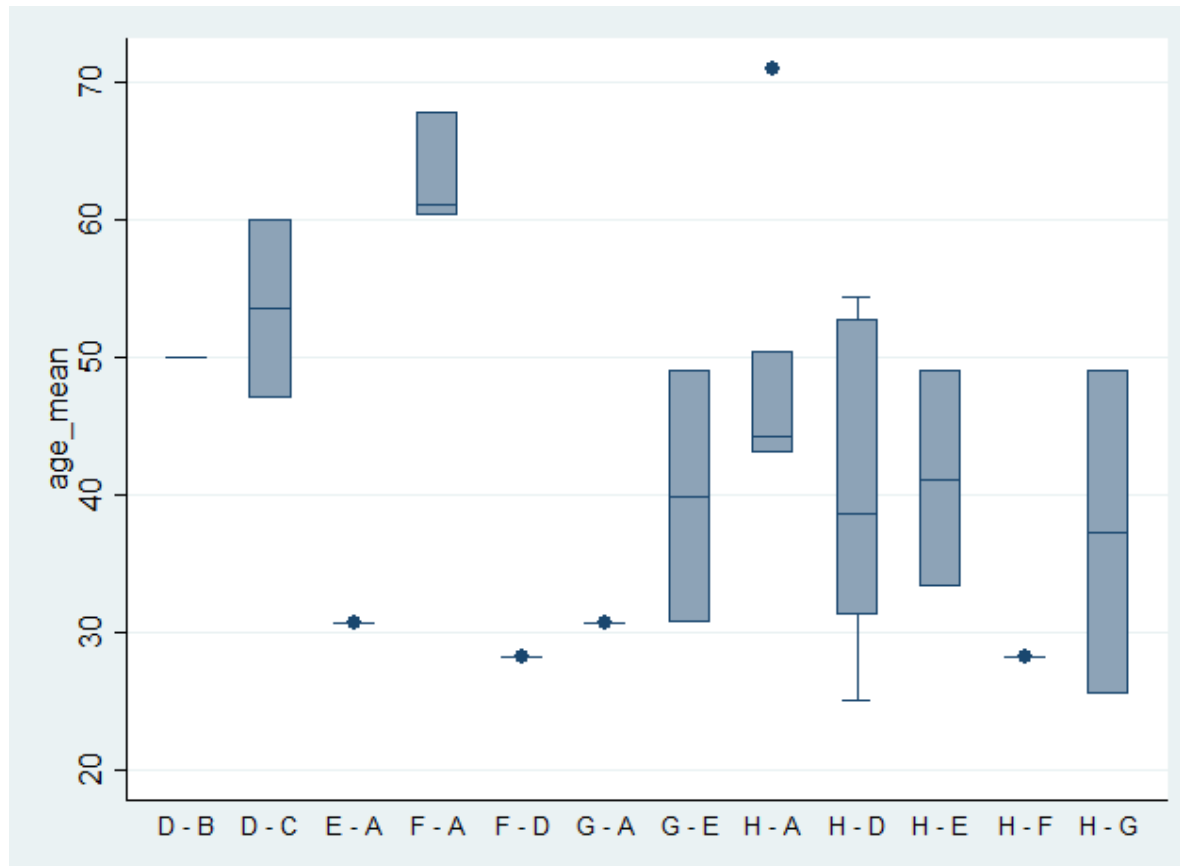

**A** = Mediterranean diet; **B** = Dietary Approaches to Stop Hypertension; **C** = Paleo diet; **D** = Dietary Guidelines-based diets; **E** = plant-based diets; **F** = low fat diet; **G** = low carbohydrate high fat diet; **H** = western habitual diet

The lower and upper edges of the box represent the 25<sup>th</sup> and 75<sup>th</sup> percentiles, the middle line in the box marks the 50th percentile (median), the error bars are the 95% confidence intervals, and any dots beyond the error bars are outliers.

**Supplementary Figure S8.** Box plot showing the distribution of participants' age across the direct comparisons for interleukin-6

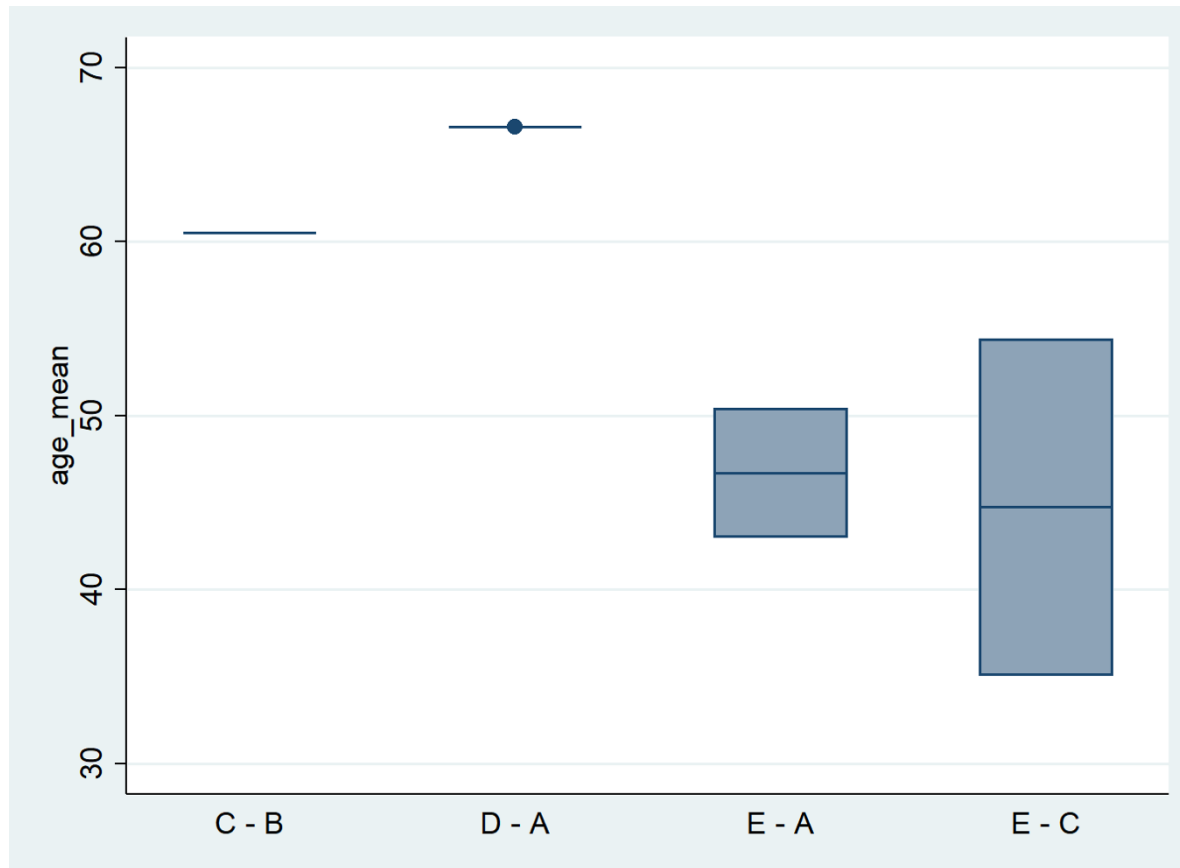

**A** = Mediterranean diet; **B** = Paleo diet; **C** = Dietary Guidelines-based diets; **D** = low fat diet; **E** = western habitual diet

The lower and upper edges of the box represent the 25<sup>th</sup> and 75<sup>th</sup> percentiles, the middle line in the box marks the 50th percentile (median), the error bars are the 95% confidence intervals, and any dots beyond the error bars are outliers.

**Supplementary Figure S9.** Box plot showing the distribution of percentage of female participants across the direct comparisons for LDL-c

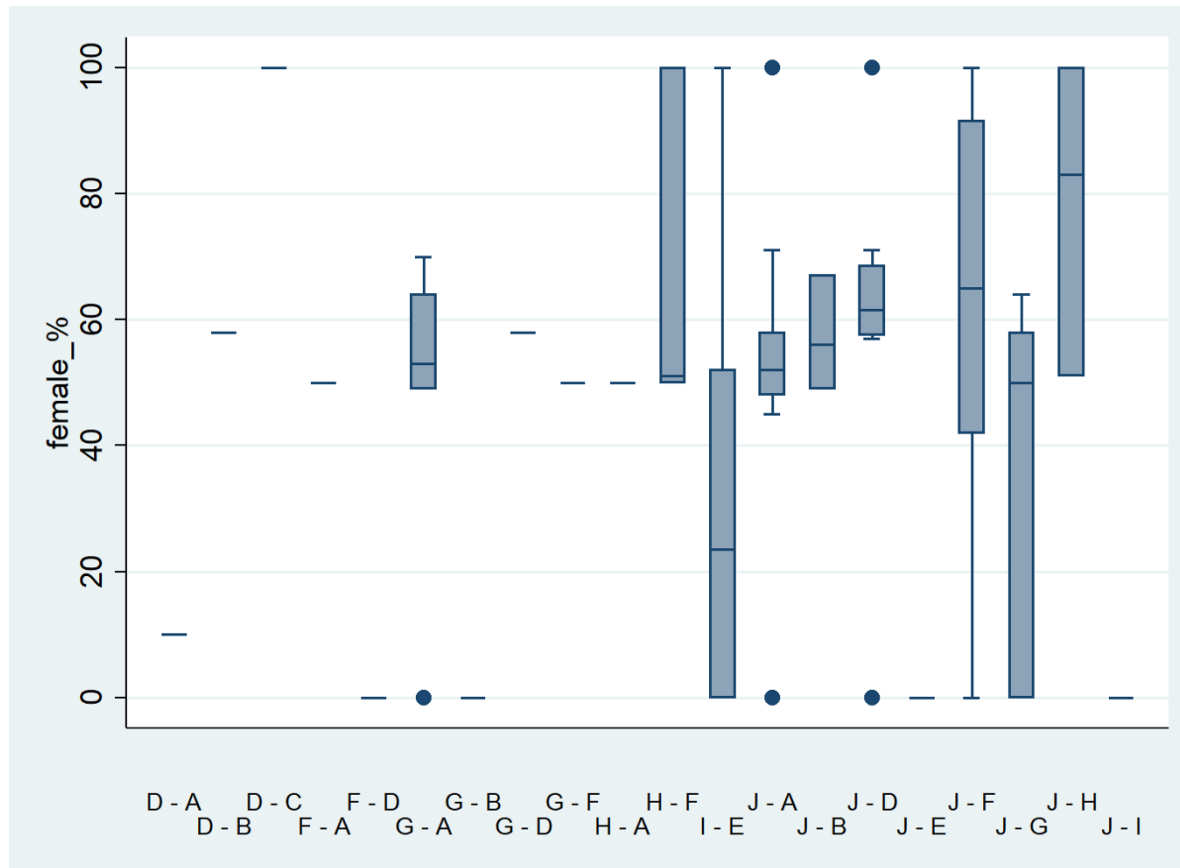

**A** = Mediterranean diet; **B** = Dietary Approaches to Stop Hypertension; **C** = Paleo diet; **D** = Dietary Guidelines-based diets; **E** = low GI / GL diet; **F** = plant-based diets; **G** = low fat diet; **H** = low carbohydrate high fat diet; **I** = high GI / GL diet; **J** = western habitual diet

The lower and upper edges of the box represent the 25<sup>th</sup> and 75<sup>th</sup> percentiles, the middle line in the box marks the 50th percentile (median), the error bars are the 95% confidence intervals, and any dots beyond the error bars are outliers.

**Supplementary Figure S10.** Box plot showing the distribution of percentage of female participants across the direct comparisons for glucose

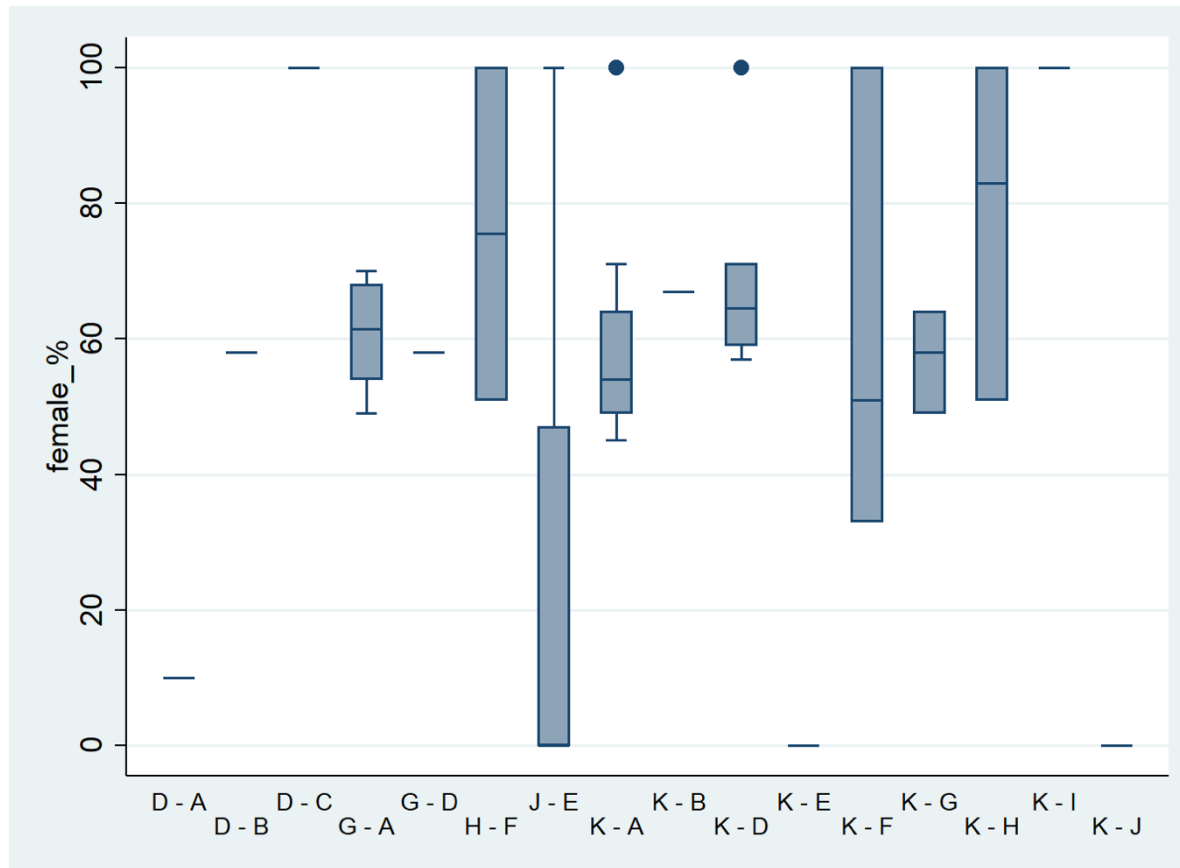

**A** = Mediterranean diet; **B** = Dietary Approaches to Stop Hypertension; **C** = Paleo diet; **D** = Dietary Guidelines-based diets; **E** = low GI / GL diet; **F** = plant-based diets; **G** = low fat diet; **H** = low carbohydrate high fat diet; **I** = traditional Mexican diet; **J** = high GI / GL diet; **K** = western habitual diet

The lower and upper edges of the box represent the 25<sup>th</sup> and 75<sup>th</sup> percentiles, the middle line in the box marks the 50th percentile (median), the error bars are the 95% confidence intervals, and any dots beyond the error bars are outliers.



**Supplementary Figure S11.** Box plot showing the distribution of percentage of female participants across the direct comparisons for hsCRP

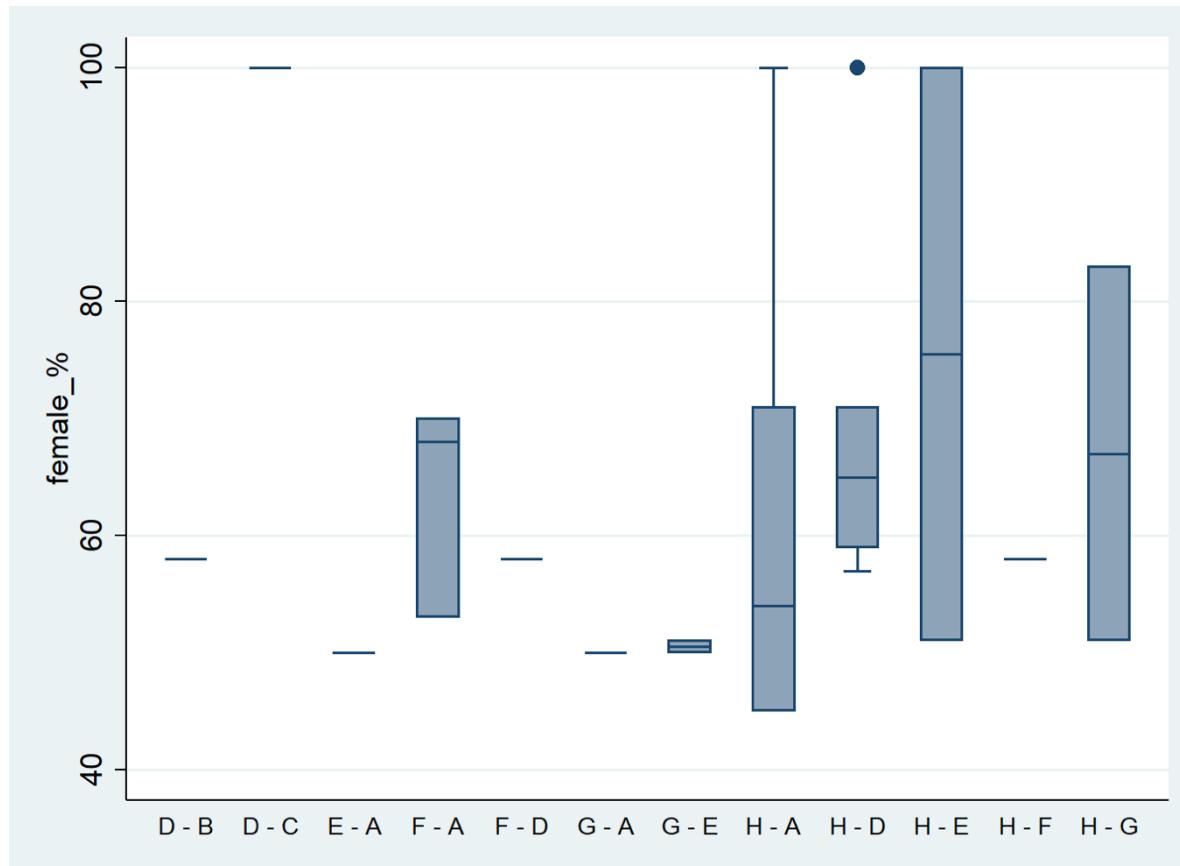

**A** = Mediterranean diet; **B** = Dietary Approaches to Stop Hypertension; **C** = Paleo diet; **D** = Dietary Guidelines-based diets; **E** = plant-based diets; **F** = low fat diet; **G** = low carbohydrate high fat diet; **H** = western habitual diet

The lower and upper edges of the box represent the 25<sup>th</sup> and 75<sup>th</sup> percentiles, the middle line in the box marks the 50th percentile (median), the error bars are the 95% confidence intervals, and any dots beyond the error bars are outliers.

**Supplementary Figure S12.** Box plot showing the distribution of intervention duration across the direct comparisons for LDL-c

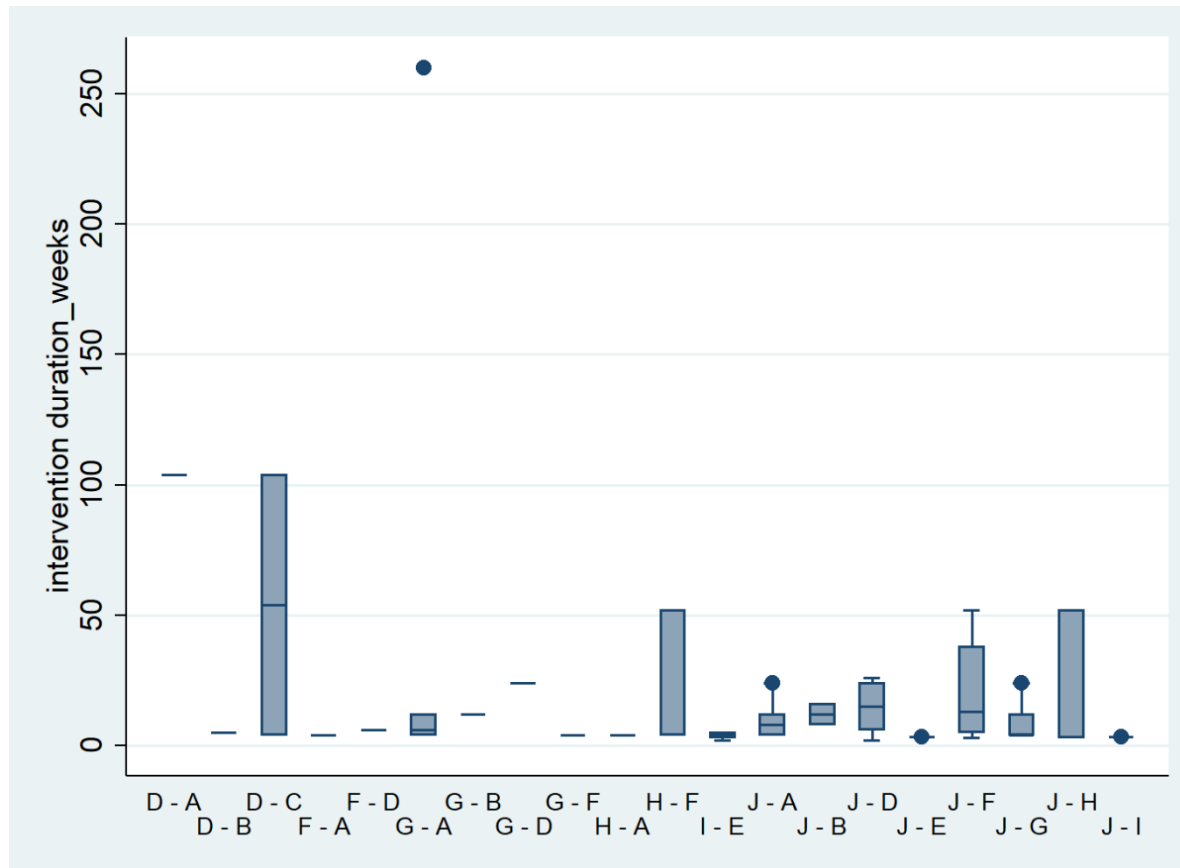

**A** = Mediterranean diet; **B** = Dietary Approaches to Stop Hypertension; **C** = Paleo diet; **D** = Dietary Guidelines-based diets; **E** = low GI / GL diet; **F** = plant-based diets; **G** = low fat diet; **H** = low carbohydrate high fat diet; **I** = high GI / GL diet; **J** = western habitual diet

The lower and upper edges of the box represent the 25<sup>th</sup> and 75<sup>th</sup> percentiles, the middle line in the box marks the 50th percentile (median), the error bars are the 95% confidence intervals, and any dots beyond the error bars are outliers.

**Supplementary Figure S13.** Box plot showing the distribution of intervention duration across the direct comparisons for glucose

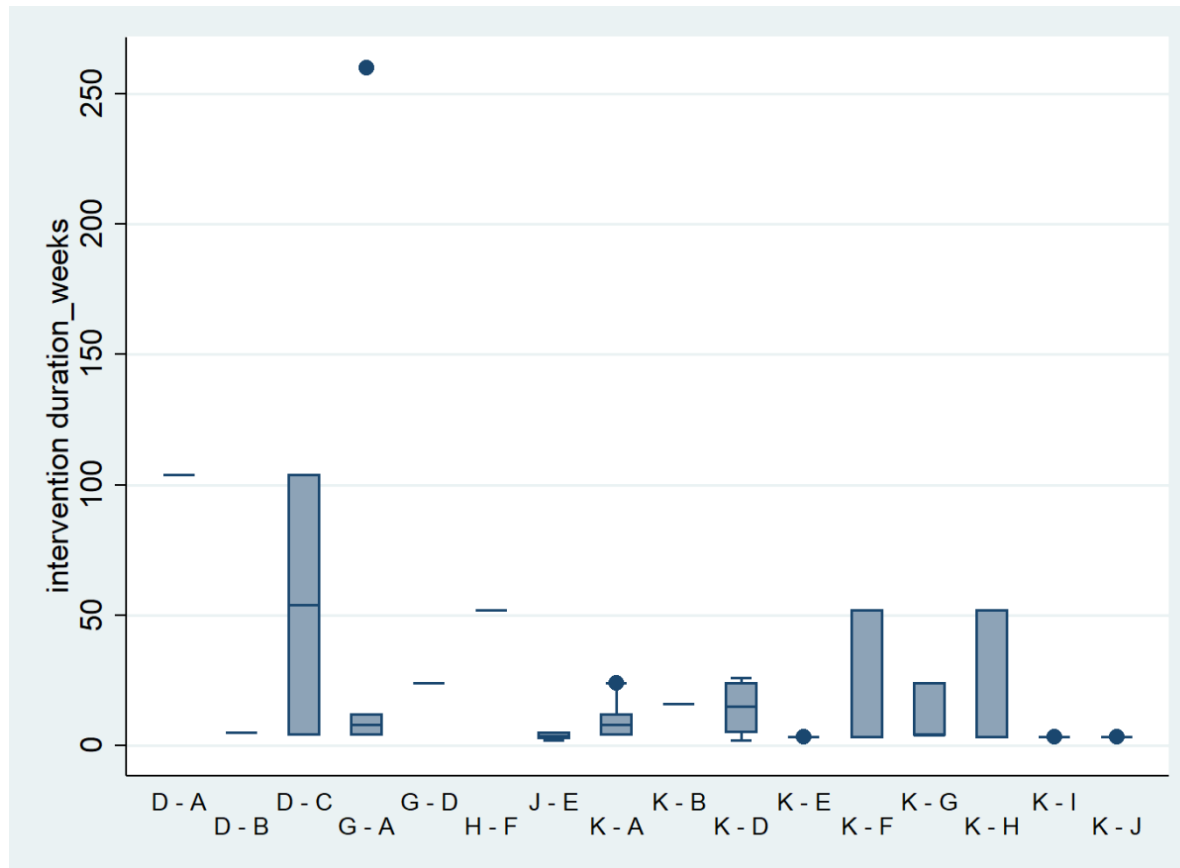

**A** = Mediterranean diet; **B** = Dietary Approaches to Stop Hypertension; **C** = Paleo diet; **D** = Dietary Guidelines-based diets; **E** = low GI / GL diet; **F** = plant-based diets; **G** = low fat diet; **H** = low carbohydrate high fat diet; **I** = traditional Mexican diet; **J** = high GI / GL diet; **K** = western habitual diet

The lower and upper edges of the box represent the 25<sup>th</sup> and 75<sup>th</sup> percentiles, the middle line in the box marks the 50th percentile (median), the error bars are the 95% confidence intervals, and any dots beyond the error bars are outliers.

**Supplementary Figure S14.** Box plot showing the distribution of intervention duration across the direct comparisons for hsCRP

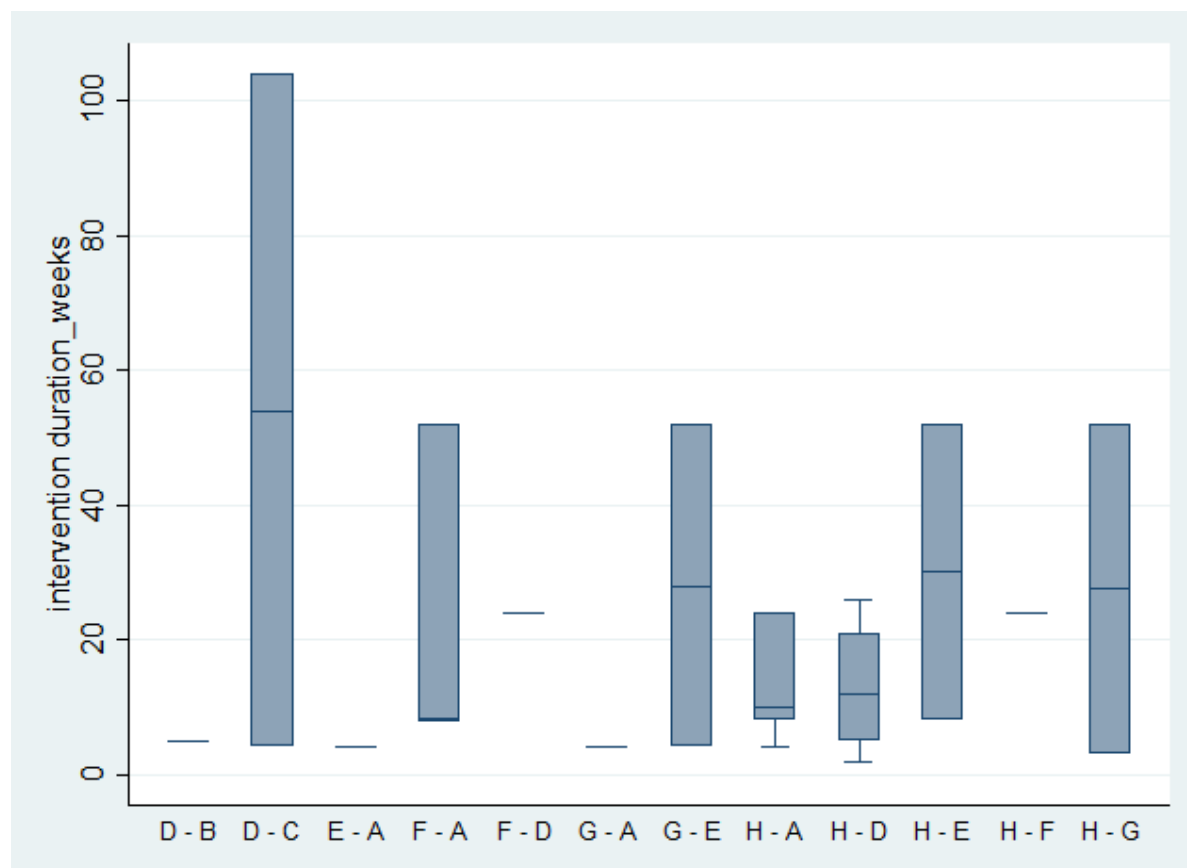

**A** = Mediterranean diet; **B** = Dietary Approaches to Stop Hypertension; **C** = Paleo diet; **D** = Dietary Guidelines-based diets; **E** = plant-based diets; **F** = low fat diet; **G** = low carbohydrate high fat diet; **H** = western habitual diet

The lower and upper edges of the box represent the 25<sup>th</sup> and 75<sup>th</sup> percentiles, the middle line in the box marks the 50th percentile (median), the error bars are the 95% confidence intervals, and any dots beyond the error bars are outliers.

**Supplementary Figure S15.** Rankograms for LDL-c<sup>1</sup>

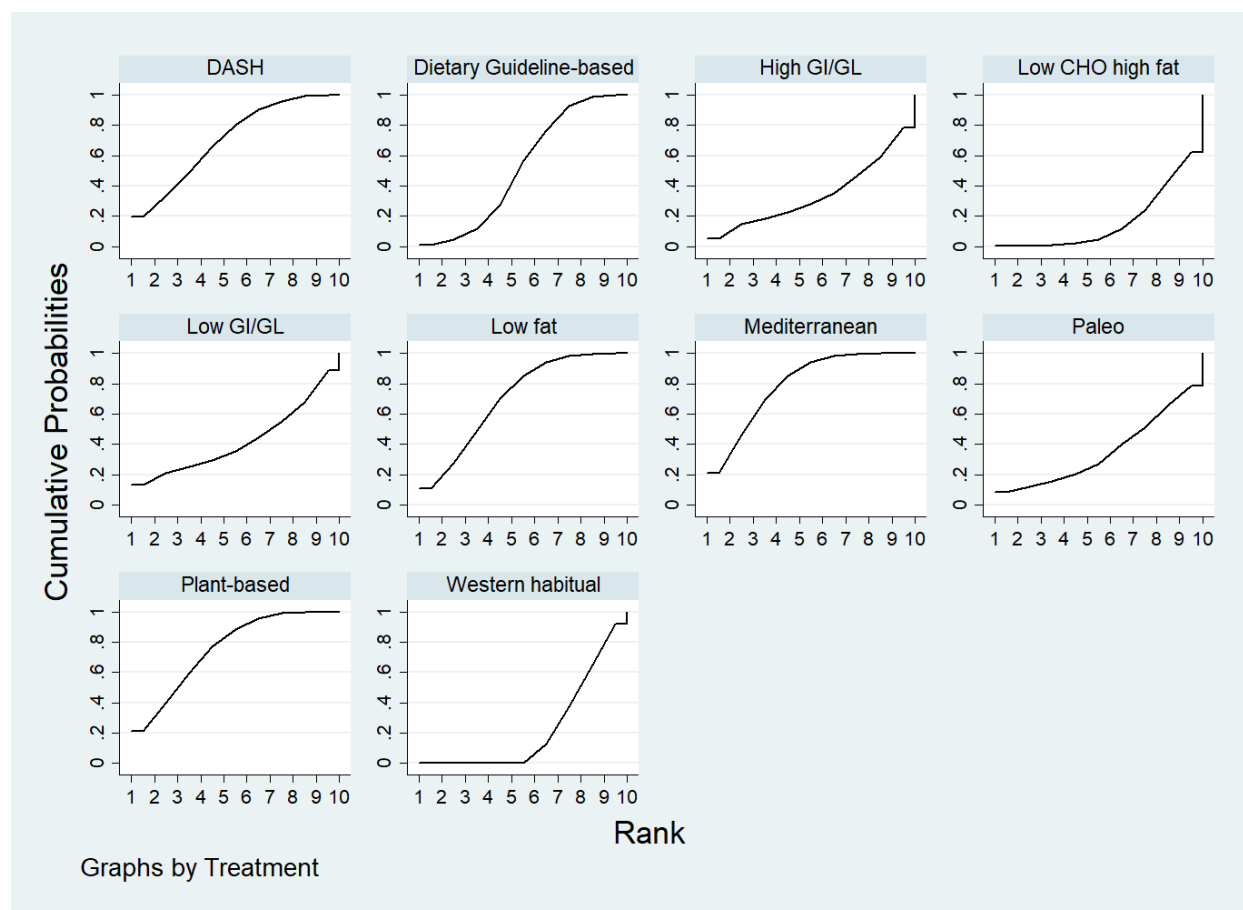

<sup>1</sup>The rankograms in general showed varied distribution of rank probabilities, except for the DASH, low fat, Mediterranean, and plant-based diet indicating uncertainty in their ranking.

*Abbreviations:* CHO, carbohydrate; DASH, Dietary Approaches to Stop Hypertension; GI/GL, glycemic index/glycemic load

**Supplementary Figure S16.** Rankograms for HDL-c<sup>1</sup>

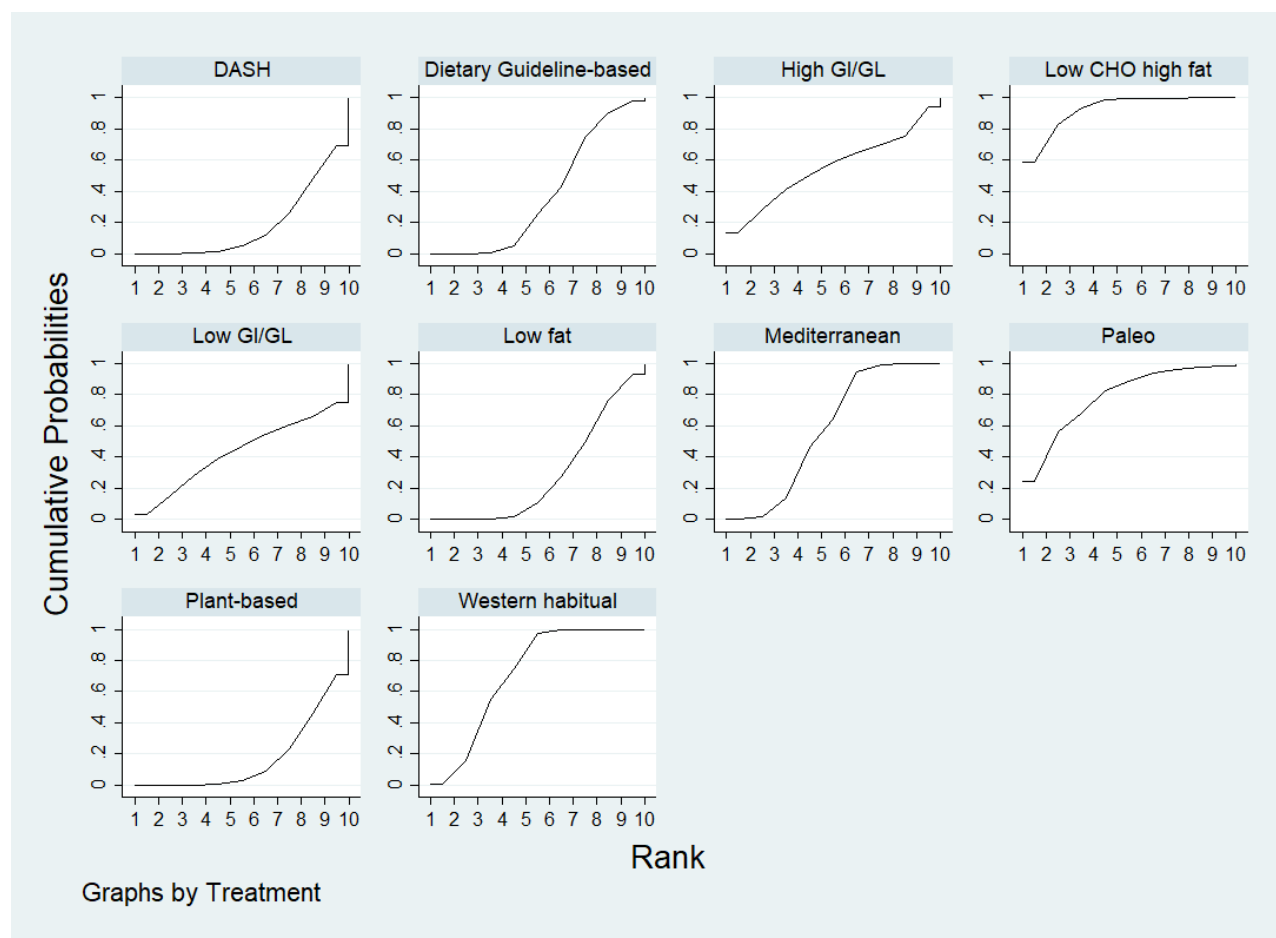

<sup>1</sup>The rankograms in general showed varied distribution of rank probabilities, except for the DASH, dietary guideline-based, low fat, plant-based diet indicating uncertainty in their ranking.

*Abbreviations:* CHO, carbohydrate; DASH, Dietary Approaches to Stop Hypertension; GI/GL, glycemic index/glycemic load

**Supplementary Figure S17.** Rankograms for total cholesterol<sup>1</sup>

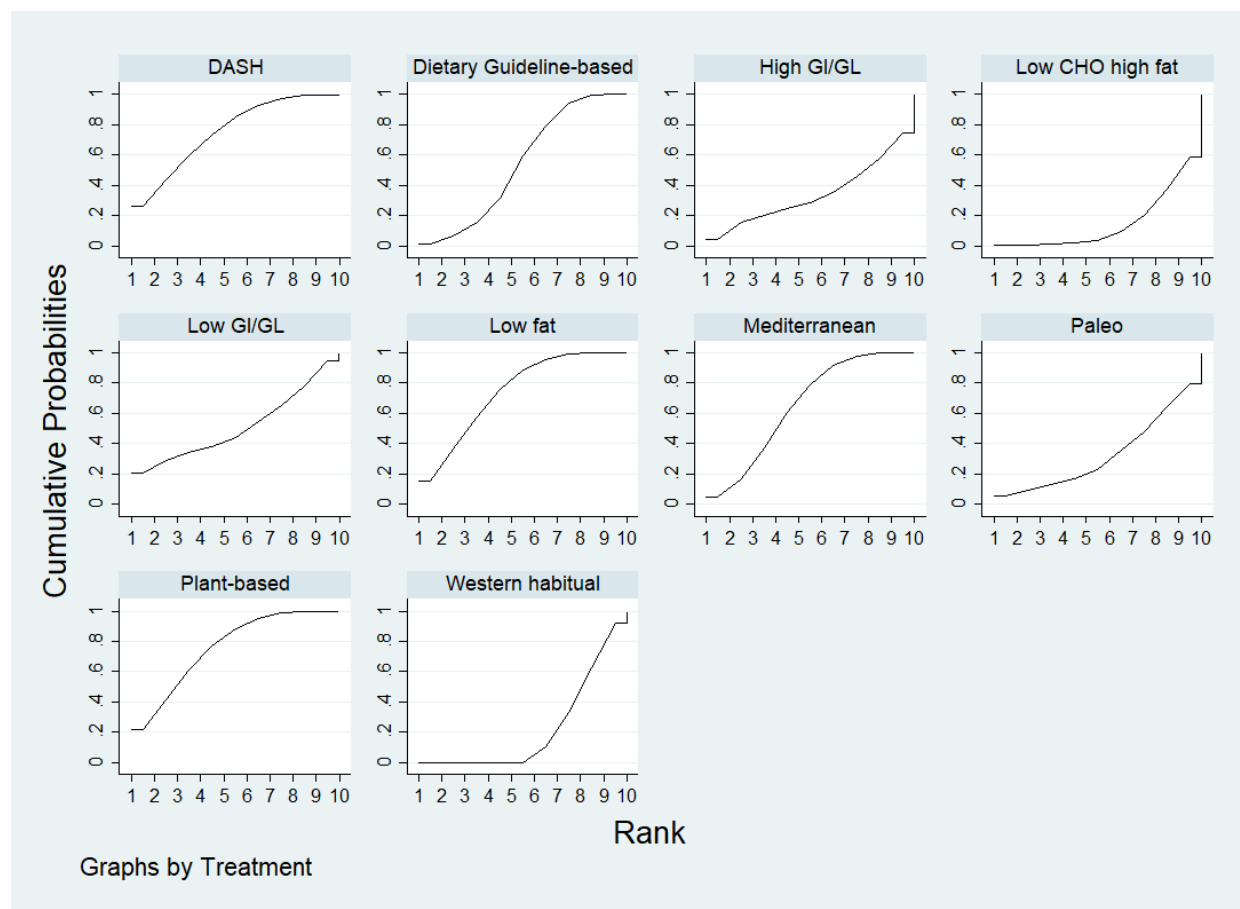

<sup>1</sup>The rankograms in general showed varied distribution of rank probabilities, except for the DASH, dietary guideline-based, low fat, Mediterranean and plant-based diet indicating uncertainty in their ranking.

*Abbreviations:* CHO, carbohydrate; DASH, Dietary Approaches to Stop Hypertension; GI/GL, glycemic index/glycemic load

**Supplementary Figure S18.** Rankograms for triglycerides<sup>1</sup>

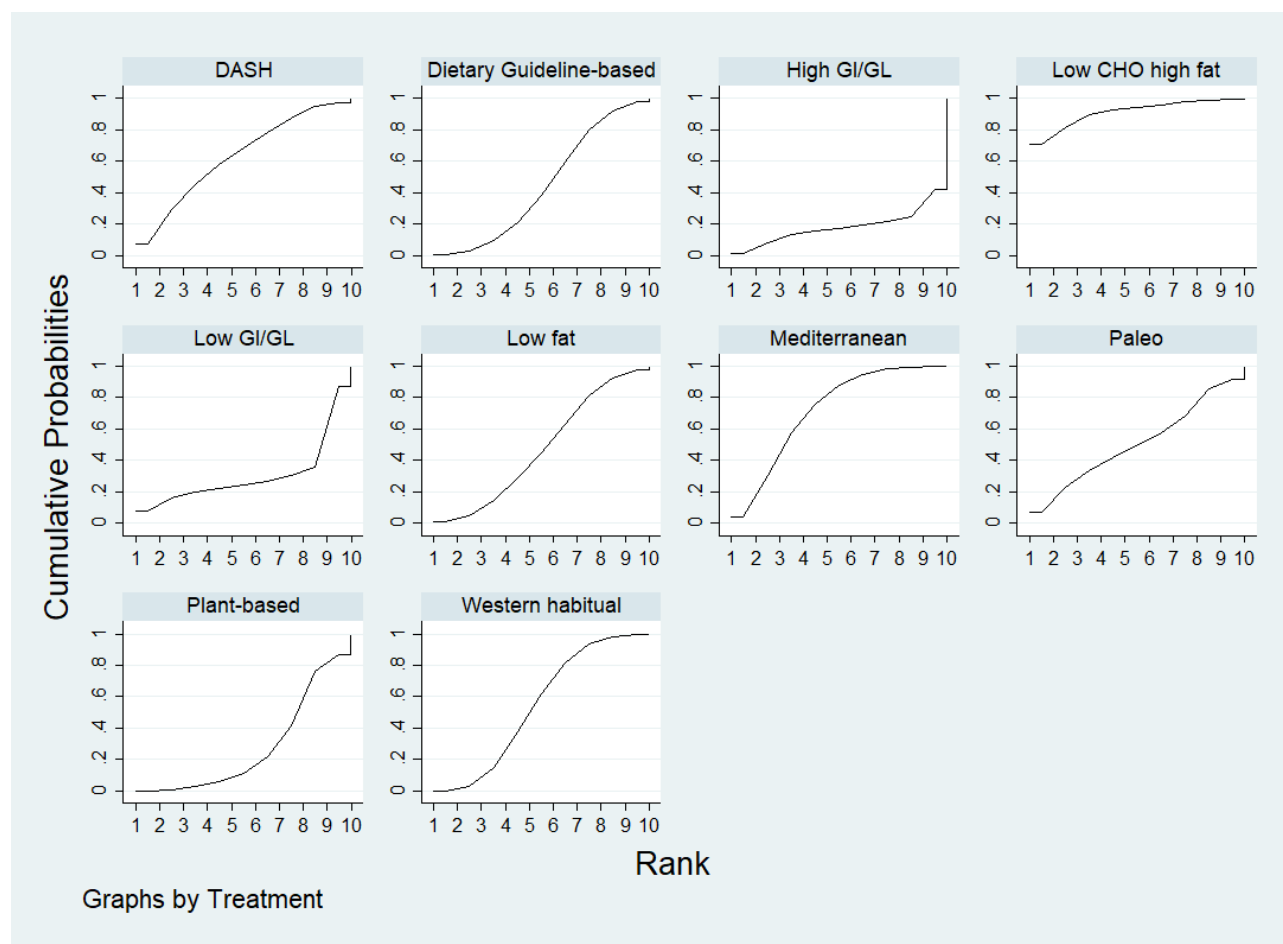

<sup>1</sup>The rankograms in general showed varied distribution of rank probabilities, except for the dietary guideline-based, low fat, and western habitual diet indicating uncertainty in their ranking.

*Abbreviations:* CHO, carbohydrate; DASH, Dietary Approaches to Stop Hypertension; GI/GL, glycemic index/glycemic load



**Supplementary Figure S19.** Rankograms for ApoB<sup>1</sup>

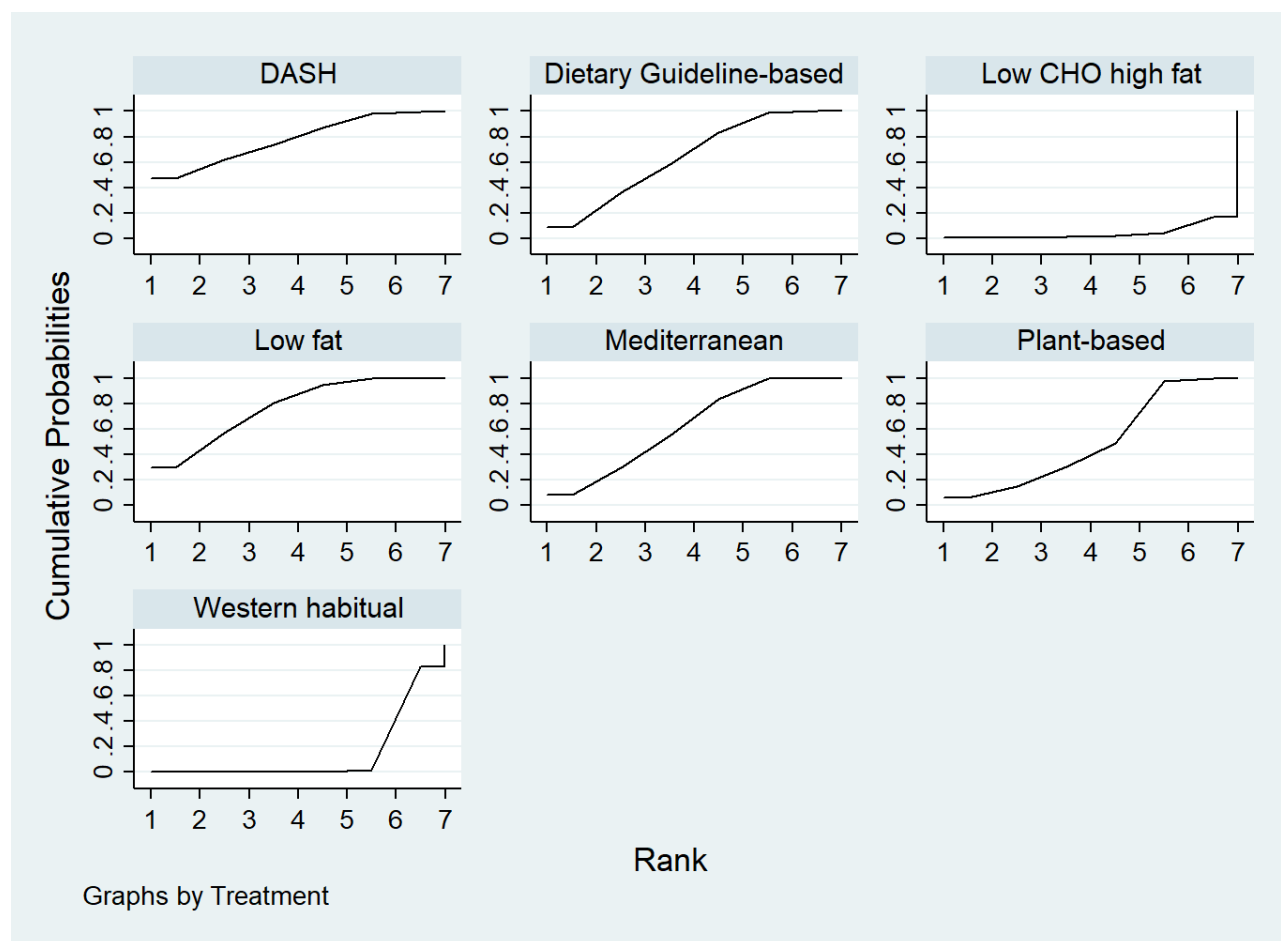

<sup>1</sup>The rankograms in general showed varied distribution of rank probabilities, except for the dietary guideline-based and Mediterranean diet indicating uncertainty in their ranking.

*Abbreviations:* CHO, carbohydrate; DASH, Dietary Approaches to Stop Hypertension

**Supplementary Figure S20.** Rankograms for ApoA1<sup>1</sup>

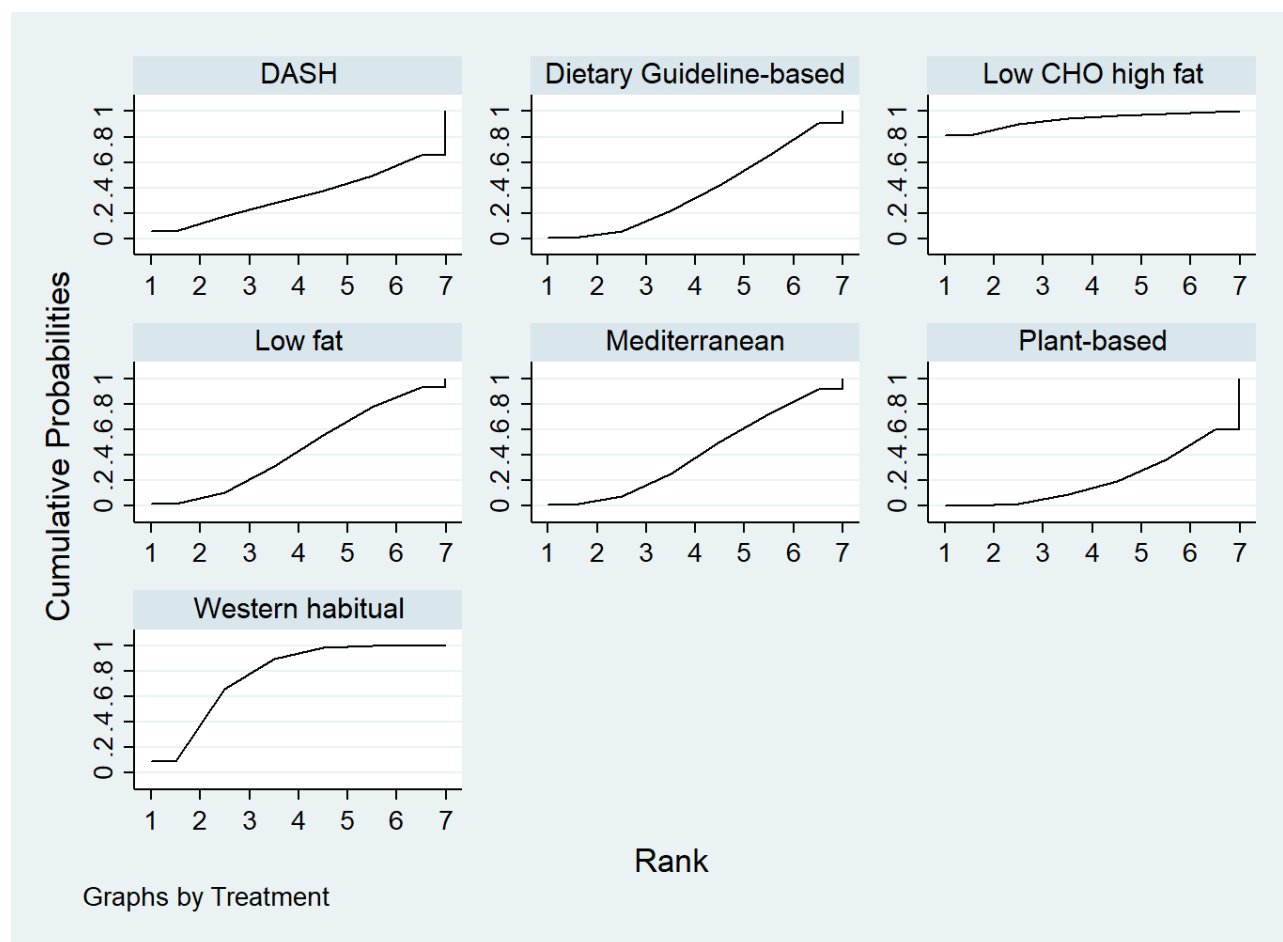

<sup>1</sup>The rankograms in general showed varied distribution of rank probabilities, except for the dietary guideline-based and Mediterranean diet indicating uncertainty in their ranking.

*Abbreviations:* CHO, carbohydrate; DASH, Dietary Approaches to Stop Hypertension

**Supplementary Figure S21.** Rankograms for glucose<sup>1</sup>

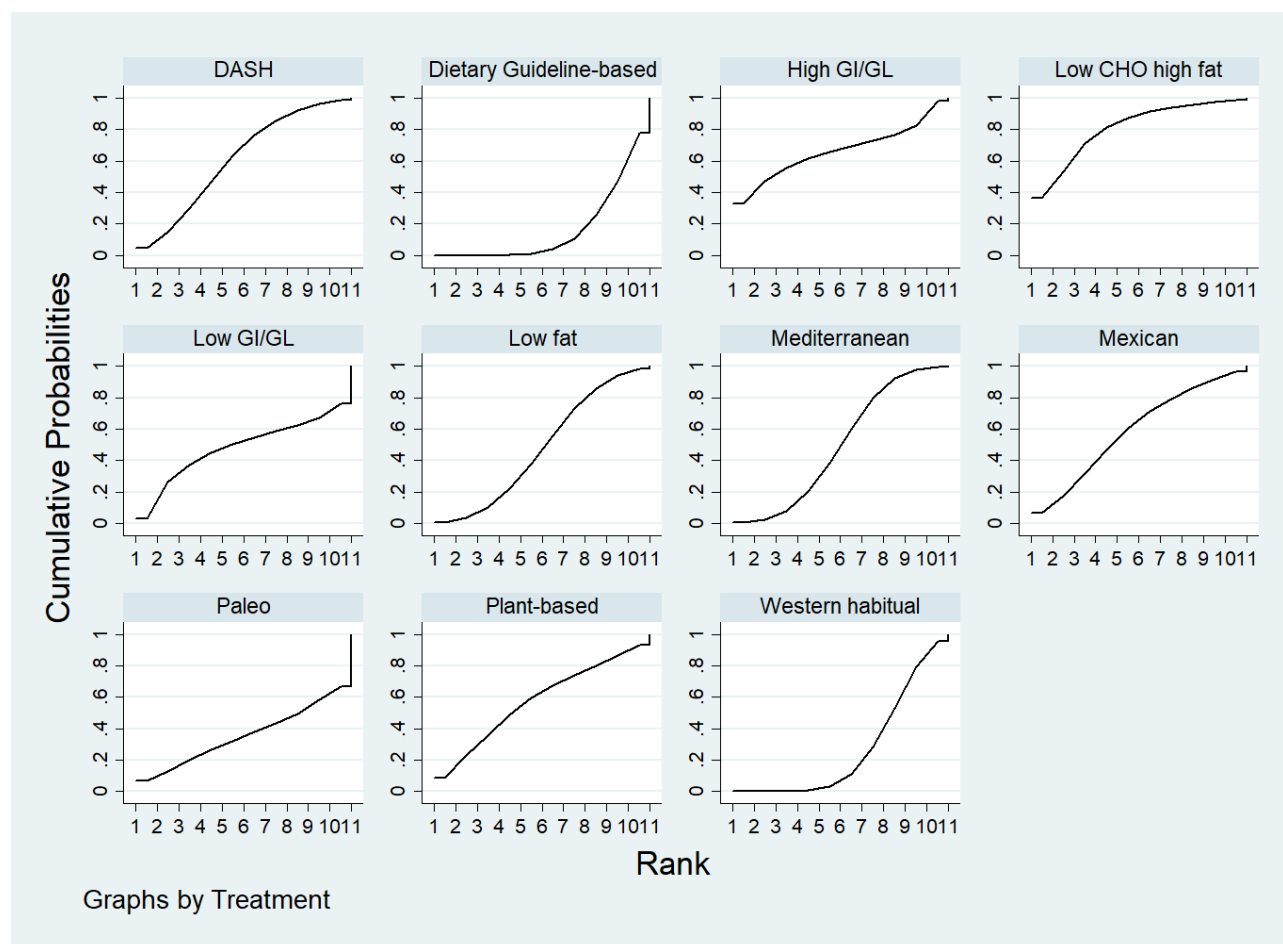

<sup>1</sup>The rankograms in general showed varied distribution of rank probabilities, except for the DASH, low fat, Mediterranean diet indicating uncertainty in their ranking.

*Abbreviations:* CHO, carbohydrate; DASH, Dietary Approaches to Stop Hypertension; GI/GL, glycemic index/glycemic load

**Supplementary Figure S22.** Rankograms for insulin<sup>1</sup>

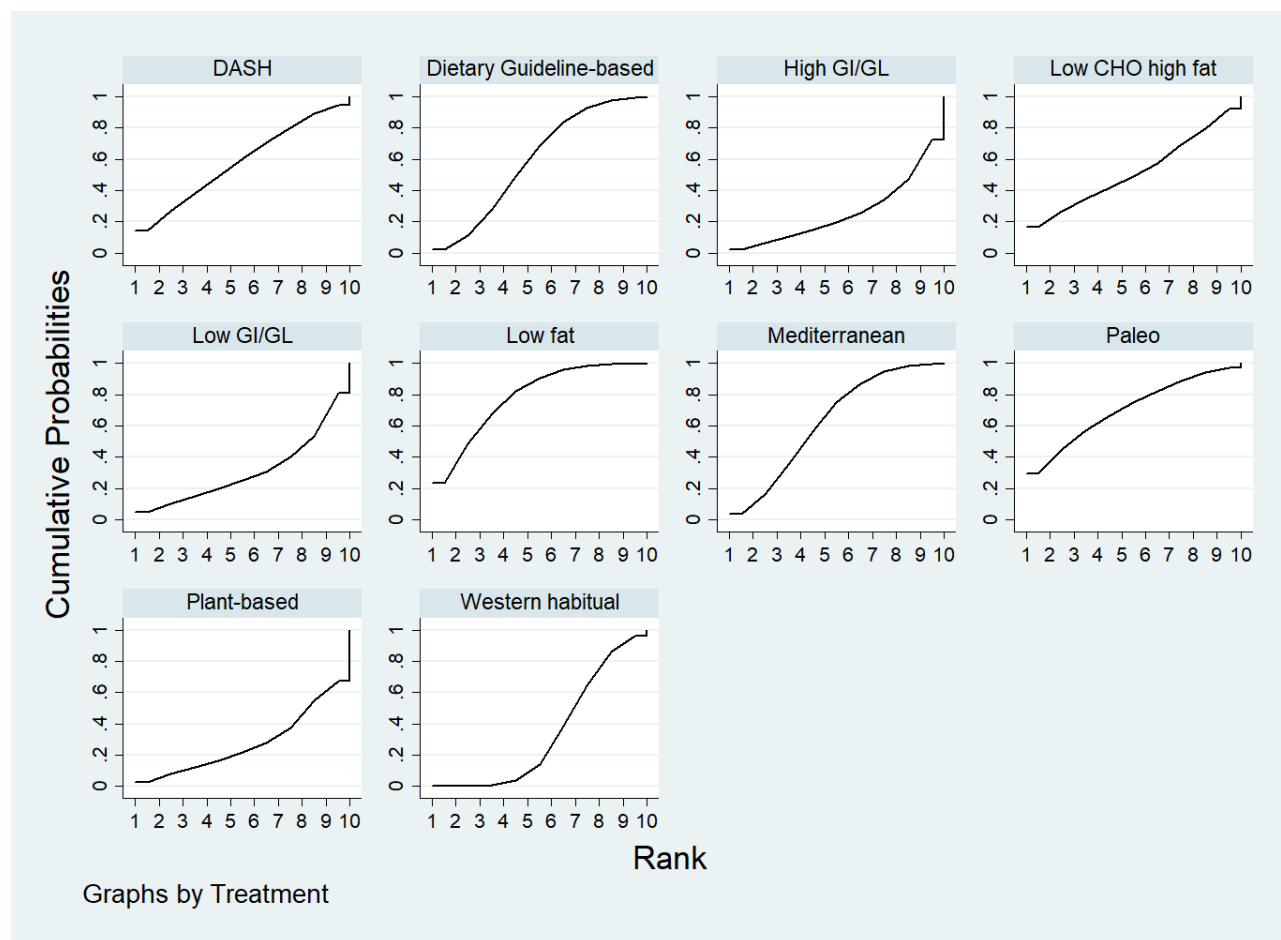

<sup>1</sup>The rankograms in general showed varied distribution of rank probabilities, except for the DASH, dietary guideline-based, high GI/GL, low GI/GL, Mediterranean, paleo, and plant-based diet indicating uncertainty in their ranking.

*Abbreviations:* CHO, carbohydrate; DASH, Dietary Approaches to Stop Hypertension; GI/GL, glycemic index/glycemic load

**Supplementary Figure S23.** Rankograms for HOMA-IR<sup>1</sup>

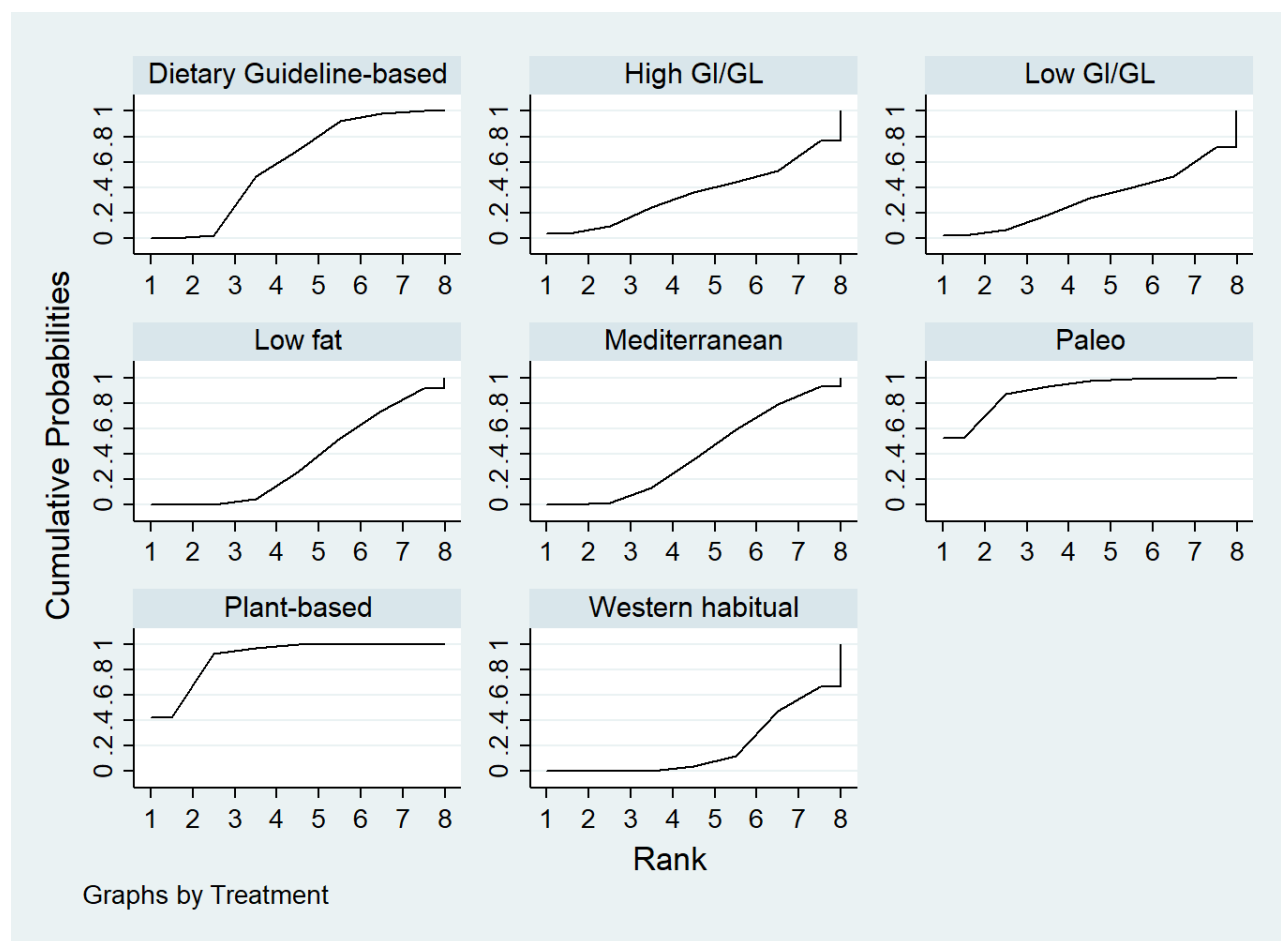

<sup>1</sup>The rankograms in general showed varied distribution of rank probabilities, except for the high GI/GL, low GI/GL, paleo and plant-based diet indicating uncertainty in their ranking.

*Abbreviations:* GI/GL, glycemic index/glycemic load

**Supplementary Figure S24.** Rankograms for hsCRP<sup>1</sup>

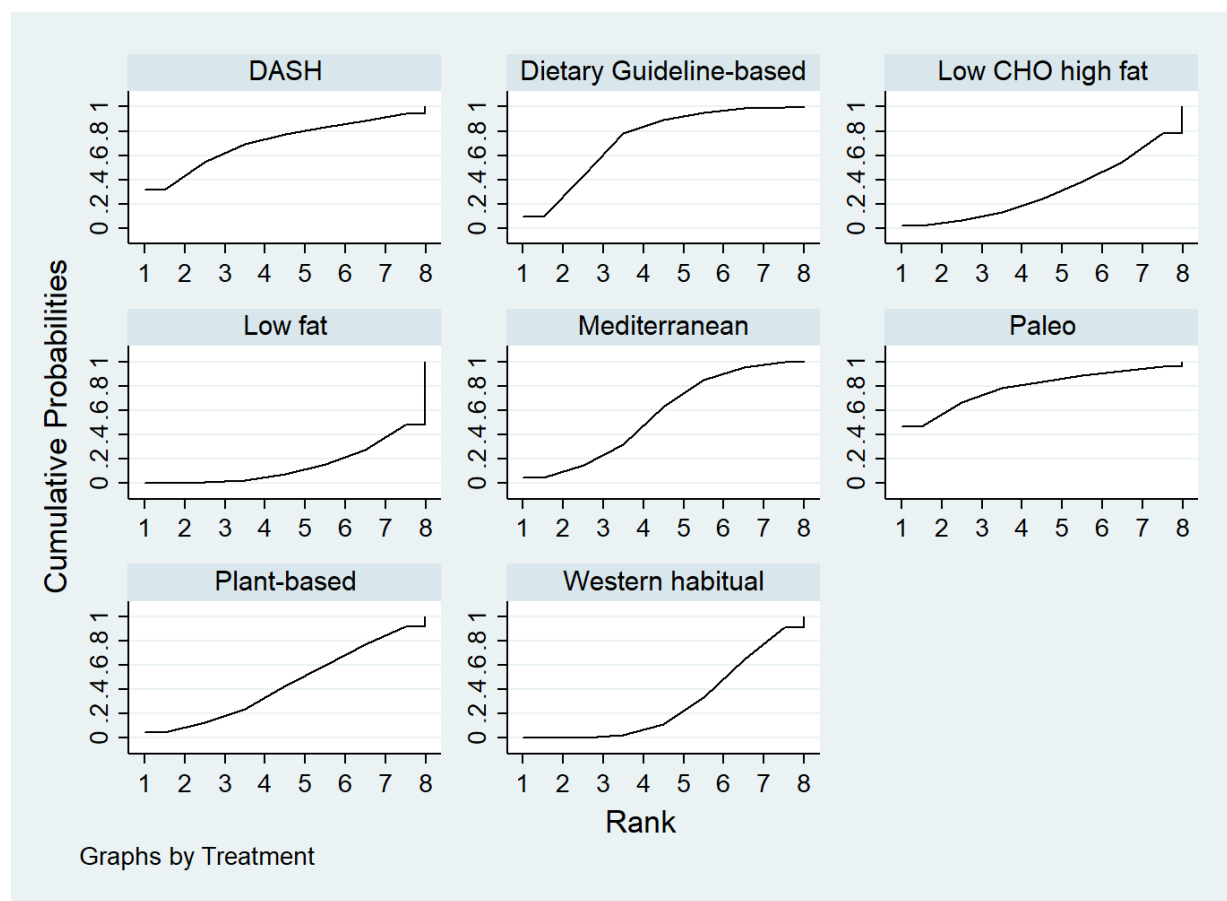

<sup>1</sup>The rankograms in general showed varied distribution of rank probabilities, except for the DASH, low CHO high fat, Mediterranean, and plant-based diet indicating uncertainty in their ranking.

*Abbreviations:* CHO, carbohydrate; DASH, Dietary Approaches to Stop Hypertension

**Supplementary Figure S25.** Rankograms for interleukin-6<sup>1</sup>

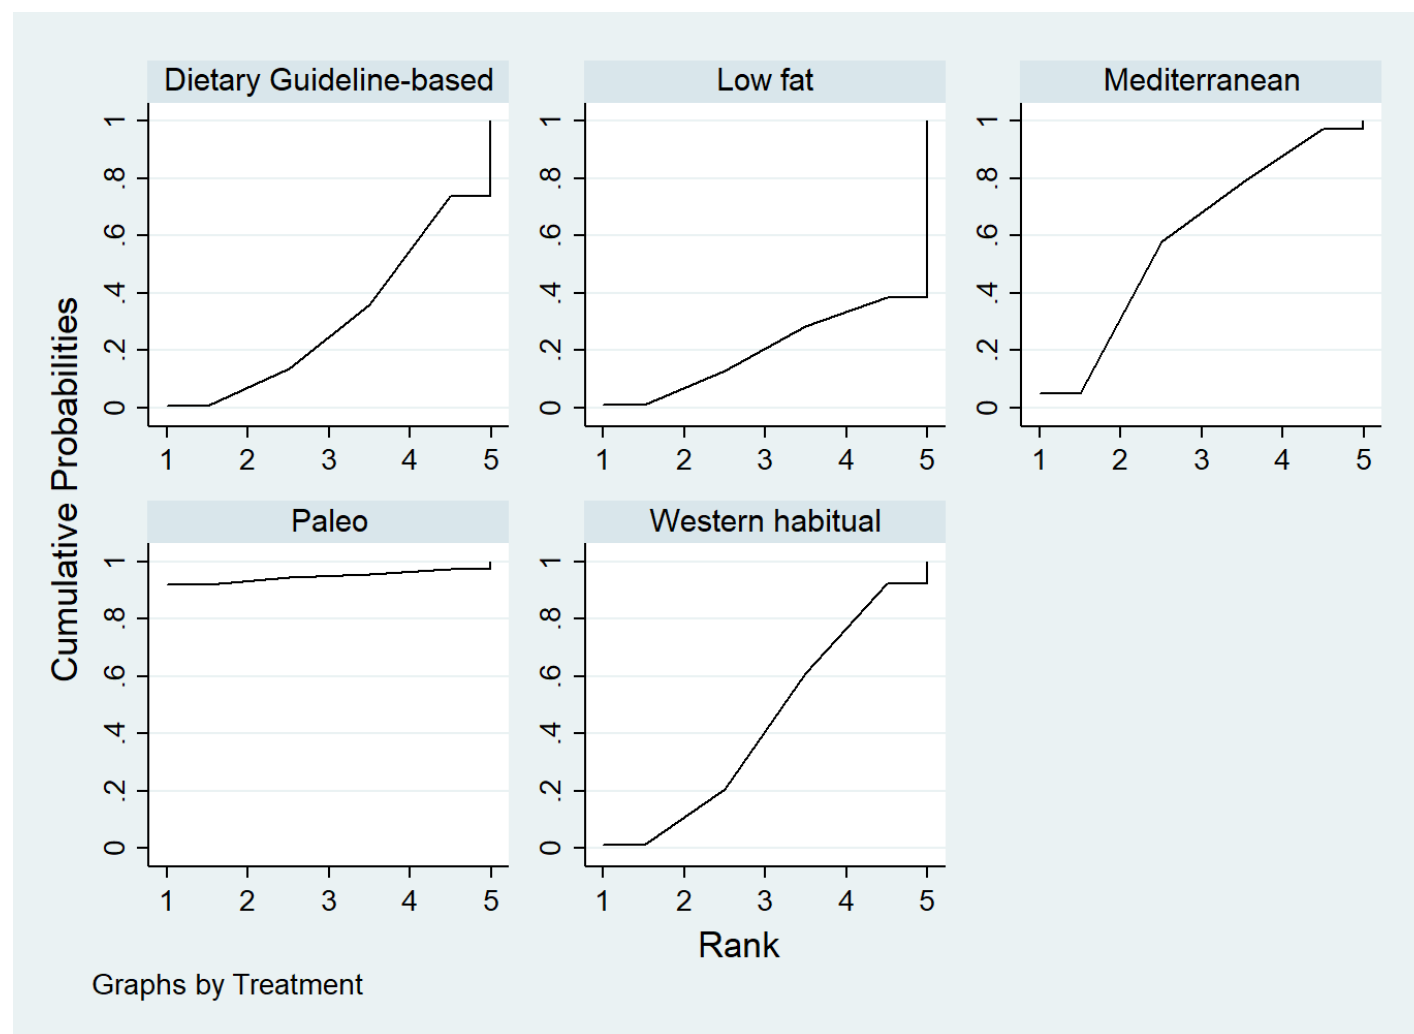

<sup>1</sup>The rankograms in general showed varied distribution of rank probabilities, indicating relatively high certainty in their ranking.

**Supplementary Table S15.** Loop-specific approach assessing inconsistency for LDL-c

| Loop  | IF   | Standard Error | z value | p value | 95% CI      | Loop-specific Heterogeneity (T <sup>2</sup> ) |
|-------|------|----------------|---------|---------|-------------|-----------------------------------------------|
| D-F-G | 0.63 | 0.20           | 3.08    | 0.00    | (0.23,1.03) | 0.000                                         |
| A-D-G | 0.48 | 0.19           | 2.55    | 0.01    | (0.11,0.86) | 0.000                                         |
| A-D-J | 0.46 | 0.32           | 1.45    | 0.15    | (0.00,1.07) | 0.064                                         |
| A-F-H | 0.40 | 0.56           | 0.72    | 0.47    | (0.00,1.50) | 0.000                                         |
| D-F-J | 0.34 | 0.24           | 1.44    | 0.15    | (0.00,0.81) | 0.021                                         |
| B-D-G | 0.34 | 0.31           | 1.11    | 0.27    | (0.00,0.94) | 0.000                                         |
| F-H-J | 0.31 | 0.26           | 1.20    | 0.23    | (0.00,0.82) | 0.023                                         |
| B-D-J | 0.29 | 0.33           | 0.89    | 0.37    | (0.00,0.94) | 0.041                                         |
| F-G-J | 0.24 | 0.17           | 1.43    | 0.15    | (0.00,0.58) | 0.016                                         |
| A-F-J | 0.23 | 0.48           | 0.48    | 0.63    | (0.00,1.18) | 0.043                                         |
| E-I-J | 0.23 | 0.49           | 0.48    | 0.63    | (0.00,1.18) | 0.015                                         |
| A-H-J | 0.23 | 0.52           | 0.44    | 0.66    | (0.00,1.24) | 0.071                                         |
| A-F-G | 0.09 | 0.41           | 0.21    | 0.83    | (0.00,0.88) | 0.000                                         |
| D-G-J | 0.07 | 0.34           | 0.22    | 0.83    | (0.00,0.74) | 0.044                                         |
| A-G-J | 0.06 | 0.16           | 0.40    | 0.69    | (0.00,0.37) | 0.030                                         |
| A-D-F | 0.06 | 0.42           | 0.14    | 0.89    | (0.00,0.88) | 0.000                                         |
| B-G-J | 0.06 | 0.29           | 0.19    | 0.85    | (0.00,0.62) | 0.016                                         |

**A** = Mediterranean diet; **B** = Dietary Approaches to Stop Hypertension; **D** = Dietary guidelines-based diets; **E** = low GI / GL diet; **F** = plant-based diets; **G** = low fat diet; **H** = low carbohydrate high fat diet; **I** = high GI / GL diet; **J** = western habitual diet

Inconsistency was inferred if IF  $\geq 0.7$  and the lower limit of CI does not read zero and  $p$  value  $\leq 0.05$ .

Abbreviations: IF, inconsistency factor



**Supplementary Table S16.** Loop-specific approach assessing inconsistency for HDL-c

| Loop  | IF   | Standard Error | z value | p value | 95% CI      | Loop-specific Heterogeneity (T <sup>2</sup> ) |
|-------|------|----------------|---------|---------|-------------|-----------------------------------------------|
| A-F-G | 0.21 | 0.20           | 1.08    | 0.28    | (0.00,0.60) | 0.000                                         |
| D-F-J | 0.16 | 0.08           | 1.89    | 0.06    | (0.00,0.32) | 0.001                                         |
| A-D-F | 0.15 | 0.20           | 0.74    | 0.46    | (0.00,0.55) | 0.000                                         |
| F-G-J | 0.11 | 0.04           | 2.83    | 0.01    | (0.03,0.18) | 0.000                                         |
| A-D-G | 0.10 | 0.08           | 1.35    | 0.18    | (0.00,0.25) | 0.000                                         |
| A-F-J | 0.08 | 0.20           | 0.43    | 0.67    | (0.00,0.47) | 0.000                                         |
| A-H-J | 0.08 | 0.21           | 0.39    | 0.69    | (0.00,0.49) | 0.000                                         |
| B-D-J | 0.07 | 0.11           | 0.59    | 0.56    | (0.00,0.29) | 0.004                                         |
| A-D-J | 0.07 | 0.05           | 1.37    | 0.17    | (0.00,0.16) | 0.001                                         |
| D-F-G | 0.04 | 0.09           | 0.45    | 0.65    | (0.00,0.21) | 0.000                                         |
| D-G-J | 0.04 | 0.11           | 0.37    | 0.72    | (0.00,0.25) | 0.004                                         |
| A-G-J | 0.04 | 0.05           | 0.80    | 0.42    | (0.00,0.13) | 0.000                                         |
| B-G-J | 0.04 | 0.07           | 0.50    | 0.62    | (0.00,0.17) | 0.000                                         |
| B-D-G | 0.02 | 0.11           | 0.18    | 0.86    | (0.00,0.23) | 0.000                                         |
| A-F-H | 0.02 | 0.29           | 0.07    | 0.95    | (0.00,0.58) | 0.000                                         |
| F-H-J | 0.02 | 0.08           | 0.22    | 0.83    | (0.00,0.17) | 0.000                                         |
| E-I-J | 0.01 | 0.20           | 0.05    | 0.96    | (0.00,0.39) | 0.000                                         |

**A** = Mediterranean diet; **B** = Dietary Approaches to Stop Hypertension; **D** = Dietary guidelines-based diets; **E** = low GI / GL diet; **F** = plant-based diets; **G** = low fat diet; **H** = low carbohydrate high fat diet; **I** = high GI / GL diet; **J** = western habitual diet

Inconsistency was inferred if  $IF \geq 0.7$  and the lower limit of CI does not read zero and  $p \text{ value} \leq 0.05$ .

Abbreviations: IF, inconsistency factor

**Supplementary Table S17.** Loop-specific approach assessing inconsistency for total cholesterol

| Loop  | IF   | Standard Error | z value | p value | 95% CI      | Loop-specific Heterogeneity (T <sup>2</sup> ) |
|-------|------|----------------|---------|---------|-------------|-----------------------------------------------|
| A-D-G | 0.75 | 0.22           | 3.41    | 0.00    | (0.32,1.18) | 0.000                                         |
| D-F-G | 0.70 | 0.22           | 3.13    | 0.00    | (0.26,1.14) | 0.000                                         |
| A-D-J | 0.68 | 0.38           | 1.77    | 0.08    | (0.00,1.43) | 0.099                                         |
| A-F-H | 0.41 | 0.81           | 0.51    | 0.61    | (0.00,2.01) | 0.000                                         |
| E-I-J | 0.39 | 0.53           | 0.74    | 0.46    | (0.00,1.42) | 0.000                                         |
| F-H-J | 0.36 | 0.29           | 1.23    | 0.22    | (0.00,0.93) | 0.007                                         |
| B-D-J | 0.33 | 0.40           | 0.83    | 0.40    | (0.00,1.11) | 0.065                                         |
| A-D-F | 0.32 | 0.61           | 0.52    | 0.60    | (0.00,1.52) | 0.000                                         |
| B-D-G | 0.32 | 0.37           | 0.87    | 0.38    | (0.00,1.04) | 0.000                                         |
| F-G-J | 0.30 | 0.15           | 2.04    | 0.04    | (0.01,0.59) | 0.010                                         |
| A-F-G | 0.27 | 0.60           | 0.45    | 0.65    | (0.00,1.45) | 0.000                                         |
| D-F-J | 0.26 | 0.31           | 0.83    | 0.41    | (0.00,0.86) | 0.047                                         |
| B-G-J | 0.13 | 0.36           | 0.36    | 0.72    | (0.00,0.84) | 0.026                                         |
| A-H-J | 0.11 | 0.68           | 0.16    | 0.88    | (0.00,1.45) | 0.109                                         |
| A-F-J | 0.10 | 0.69           | 0.15    | 0.88    | (0.00,1.45) | 0.054                                         |
| D-G-J | 0.08 | 0.42           | 0.20    | 0.84    | (0.00,0.90) | 0.074                                         |
| A-G-J | 0.03 | 0.19           | 0.15    | 0.88    | (0.00,0.39) | 0.042                                         |

**A** = Mediterranean diet; **B** = Dietary Approaches to Stop Hypertension; **D** = Dietary guidelines-based diets; **E** = low GI / GL diet; **F** = plant-based diets; **G** = low fat diet; **H** = low carbohydrate high fat diet; **I** = high GI / GL diet; **J** = western habitual diet

Inconsistency was inferred if  $IF \geq 0.7$  and the lower limit of CI does not read zero and  $p$  value  $\leq 0.05$ .

Abbreviations: IF, inconsistency factor

**Supplementary Table S18.** Loop-specific approach assessing inconsistency for triglycerides

| Loop  | IF   | Standard Error | z value | p value | 95% CI      | Loop-specific Heterogeneity (T <sup>2</sup> ) |
|-------|------|----------------|---------|---------|-------------|-----------------------------------------------|
| B-G-J | 0.40 | 0.23           | 1.73    | 0.08    | (0.00,0.86) | 0.000                                         |
| A-D-G | 0.39 | 0.08           | 4.89    | 0.00    | (0.24,0.55) | 0.000                                         |
| B-D-G | 0.30 | 0.25           | 1.19    | 0.24    | (0.00,0.80) | 0.000                                         |
| A-D-J | 0.27 | 0.10           | 2.77    | 0.01    | (0.08,0.46) | 0.005                                         |
| D-F-J | 0.21 | 0.11           | 1.86    | 0.06    | (0.00,0.43) | 0.001                                         |
| A-F-G | 0.17 | 0.22           | 0.78    | 0.43    | (0.00,0.61) | 0.000                                         |
| D-G-J | 0.14 | 0.15           | 0.99    | 0.32    | (0.00,0.43) | 0.009                                         |
| F-G-J | 0.14 | 0.06           | 2.49    | 0.01    | (0.03,0.25) | 0.000                                         |
| A-F-H | 0.13 | 0.35           | 0.38    | 0.71    | (0.00,0.82) | 0.000                                         |
| F-H-J | 0.13 | 0.19           | 0.68    | 0.50    | (0.00,0.51) | 0.000                                         |
| A-D-F | 0.11 | 0.24           | 0.47    | 0.64    | (0.00,0.57) | 0.000                                         |
| D-F-G | 0.11 | 0.12           | 0.96    | 0.34    | (0.00,0.34) | 0.000                                         |
| A-H-J | 0.07 | 0.24           | 0.31    | 0.76    | (0.00,0.54) | 0.000                                         |
| E-I-J | 0.05 | 0.39           | 0.13    | 0.90    | (0.00,0.82) | 0.000                                         |
| A-F-J | 0.03 | 0.22           | 0.12    | 0.91    | (0.00,0.46) | 0.000                                         |
| A-G-J | 0.01 | 0.06           | 0.16    | 0.87    | (0.00,0.14) | 0.000                                         |
| B-D-J | 0.00 | 0.19           | 0.01    | 0.99    | (0.00,0.37) | 0.013                                         |

**A** = Mediterranean diet; **B** = Dietary Approaches to Stop Hypertension; **D** = Dietary guidelines-based diets; **E** = low GI / GL diet; **F** = plant-based diets; **G** = low fat diet; **H** = low carbohydrate high fat diet; **I** = high GI / GL diet; **J** = western habitual diet

Inconsistency was inferred if  $IF \geq 0.7$  and the lower limit of CI does not read zero and  $p \text{ value} \leq 0.05$ .

Abbreviations: IF, inconsistency factor

**Supplementary Table S19.** Loop-specific approach assessing inconsistency for ApoB

| Loop  | IF   | Standard Error | z value | p value | 95% CI      | Loop-specific Heterogeneity (T <sup>2</sup> ) |
|-------|------|----------------|---------|---------|-------------|-----------------------------------------------|
| A-F-G | 0.07 | 0.15           | 0.49    | 0.63    | (0.00,0.36) | 0.001                                         |
| D-F-G | 0.07 | 0.14           | 0.47    | 0.64    | (0.00,0.34) | 0.000                                         |
| A-E-G | 0.06 | 0.04           | 1.37    | 0.17    | (0.00,0.14) | 0.000                                         |
| A-D-G | 0.01 | 0.11           | 0.05    | 0.96    | (0.00,0.21) | 0.000                                         |

**A** = Mediterranean diet; **D** = plant-based diets; **E** = low fat diet; **F** = low carbohydrate high fat diet; **G** = western habitual diet

Inconsistency was inferred if IF  $\geq 0.7$  and the lower limit of CI does not read zero and  $p$  value  $\leq 0.05$ .

Abbreviations: IF, inconsistency factor

**Supplementary Table S20.** Loop-specific approach assessing inconsistency for ApoA1

| Loop  | IF   | Standard Error | z value | p value | 95% CI      | Loop-specific Heterogeneity ( $T^2$ ) |
|-------|------|----------------|---------|---------|-------------|---------------------------------------|
| A-F-G | 0.28 | 0.17           | 1.60    | 0.11    | (0.00,0.61) | 0.000                                 |
| D-F-G | 0.14 | 0.18           | 0.77    | 0.44    | (0.00,0.50) | 0.003                                 |
| A-D-G | 0.13 | 0.15           | 0.89    | 0.37    | (0.00,0.42) | 0.001                                 |
| A-E-G | 0.13 | 0.06           | 2.29    | 0.02    | (0.02,0.25) | 0.000                                 |

**A** = Mediterranean diet; **D** = plant-based diets; **E** = low fat diet; **F** = low carbohydrate high fat diet; **G** = western habitual diet

Inconsistency was inferred if  $IF \geq 0.7$  and the lower limit of CI does not read zero and  $p$  value  $\leq 0.05$ .

Abbreviations: IF, inconsistency factor

**Supplementary Table S21.** Loop-specific approach assessing inconsistency for glucose

| Loop  | IF   | Standard Error | z value | p value | 95% CI      | Loop-specific Heterogeneity (T <sup>2</sup> ) |
|-------|------|----------------|---------|---------|-------------|-----------------------------------------------|
| A-D-G | 0.23 | 0.12           | 1.89    | 0.06    | (0.00,0.46) | 0.000                                         |
| E-J-K | 0.15 | 0.32           | 0.48    | 0.64    | (0.00,0.77) | 0.000                                         |
| A-D-K | 0.14 | 0.10           | 1.45    | 0.15    | (0.00,0.33) | 0.000                                         |
| B-D-K | 0.12 | 0.11           | 1.02    | 0.31    | (0.00,0.34) | 0.000                                         |
| D-G-K | 0.08 | 0.10           | 0.74    | 0.46    | (0.00,0.27) | 0.001                                         |
| A-G-K | 0.02 | 0.09           | 0.26    | 0.79    | (0.00,0.19) | 0.001                                         |
| F-H-K | 0.00 | 0.23           | 0.00    | 1.00    | (0.00,0.45) | 0.000                                         |

**A** = Mediterranean diet; **B** = Dietary Approaches to Stop Hypertension; **D** = Dietary guidelines-based diets; **E** = low GI / GL diet; **F** = plant-based diets; **G** = low fat diet; **H** = low carbohydrate high fat diet; **J** = high GI / GL diet; **K** = western habitual diet

Inconsistency was inferred if  $IF \geq 0.7$  and the lower limit of CI does not read zero and  $p \text{ value} \leq 0.05$ .

Abbreviations: IF, inconsistency factor

**Supplementary Table S22.** Loop-specific approach assessing inconsistency for insulin

| Loop  | IF   | Standard Error | z value | p value | 95% CI       | Loop-specific Heterogeneity ( $T^2$ ) |
|-------|------|----------------|---------|---------|--------------|---------------------------------------|
| A-G-J | 6.92 | 3.48           | 1.99    | 0.05    | (0.10,13.74) | 7.580                                 |
| D-G-J | 6.62 | 7.48           | 0.88    | 0.38    | (0.00,21.28) | 20.354                                |
| B-D-J | 1.08 | 1.90           | 0.57    | 0.57    | (0.00,4.81)  | 0.764                                 |
| E-I-J | 1.05 | 4.38           | 0.24    | 0.81    | (0.00,9.62)  | 0.000                                 |

**A** = Mediterranean diet; **B** = Dietary Approaches to Stop Hypertension; **D** = Dietary guidelines-based diets; **E** = low GI / GL diet; **G** = low fat diet; **I** = high GI / GL diet; **J** = western habitual diet

Inconsistency was inferred if  $IF \geq 0.7$  and the lower limit of CI does not read zero and  $p$  value  $\leq 0.05$ .

Abbreviations: IF, inconsistency factor

**Supplementary Table S23.** Loop-specific approach assessing inconsistency for HOMA-IR

| Loop  | IF   | Standard Error | z value | p value | 95% CI      | Loop-specific Heterogeneity (T <sup>2</sup> ) |
|-------|------|----------------|---------|---------|-------------|-----------------------------------------------|
| D-G-H | 0.40 | 0.82           | 0.49    | 0.63    | (0.00,2.01) | 0.000                                         |
| C-F-H | 0.28 | 0.28           | 1.02    | 0.31    | (0.00,0.83) | 0.000                                         |
| A-F-H | 0.02 | 0.52           | 0.04    | 0.97    | (0.00,1.04) | 0.112                                         |

**A** = Mediterranean diet; **C** = Dietary guidelines-based diets; **D** = low GI / GL diet; **F** = low fat diet; **G** = high GI / GL diet; **H** = western habitual diet

Inconsistency was inferred if  $IF \geq 0.7$  and the lower limit of CI does not read zero and  $p$  value  $\leq 0.05$ .

Abbreviations: IF, inconsistency factor



**Supplementary Table S24.** Loop-specific approach assessing inconsistency for hsCRP

| Loop  | IF   | Standard Error | z value | p value | 95% CI      | Loop-specific Heterogeneity ( $T^2$ ) |
|-------|------|----------------|---------|---------|-------------|---------------------------------------|
| A-F-H | 1.07 | 0.69           | 1.56    | 0.12    | (0.00,2.42) | 0.089                                 |
| A-G-H | 0.34 | 0.40           | 0.86    | 0.39    | (0.00,1.11) | 0.000                                 |
| A-E-H | 0.24 | 0.25           | 0.98    | 0.33    | (0.00,0.72) | 0.000                                 |
| E-G-H | 0.10 | 0.37           | 0.26    | 0.79    | (0.00,0.82) | 0.000                                 |
| D-F-H | 0.05 | 2.16           | 0.02    | 0.98    | (0.00,4.29) | 1.299                                 |
| A-E-G | 0.04 | 1.39           | 0.03    | 0.98    | (0.00,2.77) | 0.000                                 |

**A** = Mediterranean diet; **D** = Dietary guidelines-based diets; **E** = plant-based diets; **F** = low fat diet; **G** = low carbohydrate high fat diet; **H** = western habitual diet

Inconsistency was inferred if  $IF \geq 0.7$  and the lower limit of CI does not read zero and  $p$  value  $\leq 0.05$ .

Abbreviations: IF, inconsistency factor

**Supplementary Table S25.** Side-splitting approach assessing inconsistency for LDL-c

| Side  | Direct  |           | Indirect |           | Difference |           |               |
|-------|---------|-----------|----------|-----------|------------|-----------|---------------|
|       | Coef.   | Std. Err. | Coef.    | Std. Err. | Coef.      | Std. Err. | P>z           |
| A J   | 0.2240  | 0.0701    | 0.5303   | 0.1330    | -0.3063    | 0.1500    | <b>0.0410</b> |
| A D   | 0.3900  | 0.1882    | 0.0366   | 0.1022    | 0.3534     | 0.2142    | 0.0990        |
| A F   | 0.0867  | 0.4448    | 0.0042   | 0.1021    | 0.0824     | 0.4561    | 0.8570        |
| A G   | 0.0353  | 0.0839    | 0.0181   | 0.1590    | 0.0171     | 0.1796    | 0.9240        |
| A H   | 0.5964  | 0.4012    | 0.3171   | 0.1805    | 0.2793     | 0.4449    | 0.5300        |
| B J   | 0.2035  | 0.1328    | 0.3559   | 0.1873    | -0.1524    | 0.2296    | 0.5070        |
| B D   | 0.2200  | 0.2206    | 0.0189   | 0.1463    | 0.2011     | 0.2647    | 0.4470        |
| B G   | 0.0000  | 0.2956    | -0.0001  | 0.1390    | 0.0001     | 0.3266    | 1.0000        |
| C D * | -0.1331 | 0.2193    | -0.3288  | 360.3073  | 0.1957     | 360.3074  | 1.0000        |
| D J   | 0.2833  | 0.0856    | -0.1016  | 0.1321    | 0.3849     | 0.1587    | <b>0.0150</b> |
| D F   | -0.3402 | 0.2127    | -0.0288  | 0.1208    | -0.3113    | 0.2446    | 0.2030        |
| D G   | 0.1161  | 0.2591    | -0.1163  | 0.1093    | 0.2323     | 0.2812    | 0.4090        |
| E J * | -0.1000 | 0.3989    | 0.4252   | 0.6565    | -0.5252    | 0.8272    | 0.5250        |
| F J   | 0.3385  | 0.0934    | 0.0821   | 0.1683    | 0.2564     | 0.1927    | 0.1830        |
| F G   | -0.1700 | 0.1892    | 0.0974   | 0.1186    | -0.2674    | 0.2233    | 0.2310        |
| F H   | 0.1891  | 0.1865    | 0.7333   | 0.2815    | -0.5441    | 0.3385    | 0.1080        |
| G J   | 0.2371  | 0.1046    | 0.2757   | 0.1157    | -0.0387    | 0.1562    | 0.8050        |
| H J   | -0.1241 | 0.1921    | 0.0044   | 0.2671    | -0.1285    | 0.3318    | 0.6990        |
| I J * | 0.1000  | 0.3347    | -0.4252  | 0.7564    | 0.5252     | 0.8272    | 0.5250        |

**A** = Mediterranean diet; **B** = Dietary Approaches to Stop Hypertension; **C** = Paleo diet; **D** = Dietary guidelines-based diets; **E** = low GI / GL diet; **F** = plant-based diets; **G** = low fat diet; **H** = low carbohydrate high fat diet; **I** = high GI / GL diet; **J** = western habitual diet

\*All the evidence about these contrasts comes from the trials which directly compare them

**Supplementary Table S26.** Side-splitting approach assessing inconsistency for HDL-c

| Side  | Direct  |           | Indirect |           | Difference |           |               |
|-------|---------|-----------|----------|-----------|------------|-----------|---------------|
|       | Coef.   | Std. Err. | Coef.    | Std. Err. | Coef.      | Std. Err. | P>z           |
| A J   | 0.0251  | 0.0243    | 0.0285   | 0.0382    | -0.0034    | 0.0455    | 0.9410        |
| A D   | -0.0800 | 0.0338    | -0.0019  | 0.0325    | -0.0781    | 0.0469    | 0.0960        |
| A F   | -0.1890 | 0.1982    | -0.0687  | 0.0280    | -0.1203    | 0.2002    | 0.5480        |
| A G   | -0.0169 | 0.0256    | -0.1442  | 0.0394    | 0.1273     | 0.0453    | <b>0.0050</b> |
| A H   | 0.0300  | 0.2032    | 0.1258   | 0.0550    | -0.0958    | 0.2105    | 0.6490        |
| B J   | 0.0756  | 0.0331    | 0.1462   | 0.0522    | -0.0706    | 0.0619    | 0.2540        |
| B D   | 0.1000  | 0.0695    | 0.0135   | 0.0381    | 0.0865     | 0.0793    | 0.2750        |
| B G   | 0.0400  | 0.0691    | 0.0141   | 0.0399    | 0.0259     | 0.0798    | 0.7450        |
| C D * | -0.1056 | 0.0693    | -0.1147  | 135.1146  | 0.0091     | 135.1146  | 1.0000        |
| D J   | 0.0416  | 0.0284    | 0.0974   | 0.0359    | -0.0558    | 0.0461    | 0.2260        |
| D F   | 0.0404  | 0.0659    | -0.0560  | 0.0359    | 0.0964     | 0.0750    | 0.1990        |
| D G   | -0.0394 | 0.0787    | -0.0095  | 0.0312    | -0.0298    | 0.0846    | 0.7240        |
| E J * | 0.0500  | 0.1419    | 0.0357   | 0.2531    | 0.0143     | 0.2901    | 0.9610        |
| F J   | 0.1342  | 0.0223    | 0.0002   | 0.0280    | 0.1340     | 0.0358    | <b>0.0000</b> |
| F G   | -0.0400 | 0.0173    | 0.0824   | 0.0316    | -0.1224    | 0.0360    | <b>0.0010</b> |
| F H   | 0.2064  | 0.0573    | 0.1443   | 0.0950    | 0.0621     | 0.1089    | 0.5680        |
| G J   | 0.0638  | 0.0347    | 0.0863   | 0.0327    | -0.0225    | 0.0478    | 0.6370        |
| H J   | -0.0815 | 0.0592    | -0.1235  | 0.0971    | 0.0420     | 0.1143    | 0.7130        |
| I J * | 0.0200  | 0.1419    | 0.0343   | 0.2531    | -0.0143    | 0.2901    | 0.9610        |

**A** = Mediterranean diet; **B** = Dietary Approaches to Stop Hypertension; **C** = Paleo diet; **D** = Dietary guidelines-based diets; **E** = low GI / GL diet; **F** = plant-based diets; **G** = low fat diet; **H** = low carbohydrate high fat diet; **I** = high GI / GL diet; **J** = western habitual diet

\*All the evidence about these contrasts comes from the trials which directly compare them

**Supplementary Table S27.** Side-splitting approach assessing inconsistency for total cholesterol

| Side  | Direct  |           | Indirect |           | Difference |           |               |
|-------|---------|-----------|----------|-----------|------------|-----------|---------------|
|       | Coef.   | Std. Err. | Coef.    | Std. Err. | Coef.      | Std. Err. | P>z           |
| A J   | 0.2332  | 0.0861    | 0.5915   | 0.1770    | -0.3584    | 0.1963    | 0.0680        |
| A D   | 0.5500  | 0.2360    | -0.0523  | 0.1195    | 0.6023     | 0.2646    | <b>0.0230</b> |
| A F   | -0.1000 | 0.6496    | -0.0587  | 0.1290    | -0.0413    | 0.6622    | 0.9500        |
| A G   | -0.0588 | 0.1108    | 0.0075   | 0.1997    | -0.0664    | 0.2282    | 0.7710        |
| A H   | 0.5368  | 0.5605    | 0.3964   | 0.2292    | 0.1404     | 0.6097    | 0.8180        |
| B J   | 0.2887  | 0.1641    | 0.5004   | 0.2356    | -0.2117    | 0.2871    | 0.4610        |
| B D   | 0.2700  | 0.2779    | 0.0547   | 0.1792    | 0.2153     | 0.3306    | 0.5150        |
| B G   | 0.1000  | 0.3781    | -0.0004  | 0.1730    | 0.1004     | 0.4158    | 0.8090        |
| C D * | -0.1955 | 0.2539    | -0.4597  | 385.8246  | 0.2642     | 385.8247  | 0.9990        |
| D J   | 0.3537  | 0.0990    | -0.1180  | 0.1698    | 0.4717     | 0.1975    | <b>0.0170</b> |
| D F   | -0.3301 | 0.2687    | -0.0518  | 0.1516    | -0.2783    | 0.3085    | 0.3670        |
| D G   | 0.1328  | 0.3170    | -0.1441  | 0.1350    | 0.2769     | 0.3443    | 0.4210        |
| E J * | 0.0000  | 0.4377    | 0.8047   | 0.7660    | -0.8047    | 0.8226    | 0.3280        |
| F J   | 0.4272  | 0.1190    | 0.1287   | 0.2180    | 0.2985     | 0.2489    | 0.2300        |
| F G   | -0.2200 | 0.2469    | 0.1047   | 0.1507    | -0.3247    | 0.2893    | 0.2620        |
| F H   | 0.2805  | 0.2491    | 0.8571   | 0.3489    | -0.5766    | 0.4330    | 0.1830        |
| G J   | 0.2901  | 0.1267    | 0.4123   | 0.1500    | -0.1222    | 0.1964    | 0.5340        |
| H J   | -0.1779 | 0.2478    | 0.0044   | 0.3686    | -0.1823    | 0.4578    | 0.6900        |
| I J * | 0.2000  | 0.4377    | -0.6047  | 0.7660    | 0.8047     | 0.8226    | 0.3280        |

**A** = Mediterranean diet; **B** = Dietary Approaches to Stop Hypertension; **C** = Paleo diet; **D** = Dietary guidelines-based diets; **E** = low GI / GL diet; **F** = plant-based diets; **G** = low fat diet; **H** = low carbohydrate high fat diet; **I** = high GI / GL diet; **J** = western habitual diet

\*All the evidence about these contrasts comes from the trials which directly compare them

**Supplementary Table S28.** Side-splitting approach assessing inconsistency for triglycerides

| Side  | Direct  |           | Indirect |           | Difference |           |               |
|-------|---------|-----------|----------|-----------|------------|-----------|---------------|
|       | Coef.   | Std. Err. | Coef.    | Std. Err. | Coef.      | Std. Err. | P>z           |
| A J   | 0.0109  | 0.0390    | 0.1126   | 0.0729    | -0.1017    | 0.0828    | 0.2200        |
| A D   | 0.2600  | 0.0447    | -0.0456  | 0.0457    | 0.3056     | 0.0640    | <b>0.0000</b> |
| A F   | 0.1291  | 0.2326    | 0.0890   | 0.0548    | 0.0401     | 0.2390    | 0.8670        |
| A G   | -0.0115 | 0.0484    | 0.1842   | 0.0728    | -0.1957    | 0.0880    | <b>0.0260</b> |
| A H   | -0.1200 | 0.2171    | -0.1326  | 0.1280    | 0.0126     | 0.2520    | 0.9600        |
| B J   | 0.0054  | 0.0794    | 0.0601   | 0.1194    | -0.0547    | 0.1436    | 0.7030        |
| B D   | -0.0200 | 0.1266    | 0.0669   | 0.0859    | -0.0869    | 0.1530    | 0.5700        |
| B G   | 0.4000  | 0.2387    | -0.0047  | 0.0785    | 0.4047     | 0.2513    | 0.1070        |
| C D * | 0.0106  | 0.0867    | 0.0401   | 130.5248  | -0.0295    | 130.5248  | 1.0000        |
| D J   | 0.0267  | 0.0474    | -0.1207  | 0.0701    | 0.1474     | 0.0859    | 0.0860        |
| D F   | -0.0162 | 0.1228    | 0.0570   | 0.0656    | -0.0733    | 0.1393    | 0.5990        |
| D G   | 0.1198  | 0.1065    | -0.0436  | 0.0590    | 0.1634     | 0.1218    | 0.1800        |
| E J * | -0.2000 | 0.2870    | -0.0997  | 0.5091    | -0.1003    | 0.5844    | 0.8640        |
| F J   | -0.1029 | 0.0514    | 0.0592   | 0.0826    | -0.1621    | 0.0975    | 0.0960        |
| F G   | 0.0300  | 0.0869    | -0.0883  | 0.0664    | 0.1183     | 0.1094    | 0.2790        |
| F H   | -0.1682 | 0.1532    | -0.2758  | 0.1576    | 0.1076     | 0.2195    | 0.6240        |
| G J   | 0.0232  | 0.0567    | -0.0611  | 0.0658    | 0.0843     | 0.0882    | 0.3390        |
| H J   | 0.2093  | 0.1370    | 0.0878   | 0.1733    | 0.1215     | 0.2218    | 0.5840        |
| I J * | -0.2000 | 0.2870    | -0.3003  | 0.5091    | 0.1003     | 0.5844    | 0.8640        |

**A** = Mediterranean diet; **B** = Dietary Approaches to Stop Hypertension; **C** = Paleo diet; **D** = Dietary guidelines-based diets; **E** = low GI / GL diet; **F** = plant-based diets; **G** = low fat diet; **H** = low carbohydrate high fat diet; **I** = high GI / GL diet; **J** = western habitual diet

\*All the evidence about these contrasts comes from the trials which directly compare them

**Supplementary Table S29.** Side-splitting approach assessing inconsistency for ApoB

| Side  | Direct  |           | Indirect |           | Difference |           |               |
|-------|---------|-----------|----------|-----------|------------|-----------|---------------|
|       | Coef.   | Std. Err. | Coef.    | Std. Err. | Coef.      | Std. Err. | P>z           |
| A G   | 0.0926  | 0.0212    | 0.0089   | 0.0700    | 0.0837     | 0.0725    | 0.2480        |
| A D   | 0.0200  | 0.1045    | 0.0184   | 0.0373    | 0.0016     | 0.1110    | 0.9880        |
| A E * | -0.0197 | 0.0156    | 0.1741   | 0.0756    | -0.1939    | 0.0774    | <b>0.0120</b> |
| A F   | 0.1200  | 0.1044    | 0.1727   | 0.0911    | -0.0527    | 0.1385    | 0.7040        |
| B C * | 0.0200  | 0.0359    | -0.1745  | 56.5251   | 0.1945     | 56.5251   | 0.9970        |
| C G * | 0.0873  | 0.0281    | -0.0101  | 28.7800   | 0.0974     | 28.7800   | 0.9970        |
| D G   | 0.0689  | 0.0296    | 0.0477   | 0.0987    | 0.0212     | 0.1031    | 0.8370        |
| D F   | 0.1000  | 0.1045    | 0.1565   | 0.0937    | -0.0565    | 0.1404    | 0.6870        |
| E G   | 0.0758  | 0.0197    | 0.2294   | 0.0495    | -0.1536    | 0.0534    | <b>0.0040</b> |
| F G   | -0.1000 | 0.0978    | -0.0323  | 0.0922    | -0.0677    | 0.1344    | 0.6150        |

**A** = Mediterranean diet; **B** = Dietary Approaches to Stop Hypertension; **C** = Dietary guidelines-based diets; **D** = plant-based diets; **E** = low fat diet; **F** = low carbohydrate high fat diet; **G** = western habitual diet

\*All the evidence about these contrasts comes from the trials which directly compare them

**Supplementary Table S30.** Side-splitting approach assessing inconsistency for ApoA1

| Side  | Direct  |           | Indirect |           | Difference |           |        |
|-------|---------|-----------|----------|-----------|------------|-----------|--------|
|       | Coef.   | Std. Err. | Coef.    | Std. Err. | Coef.      | Std. Err. | P>z    |
| A G   | 0.0723  | 0.0565    | 0.0224   | 0.1293    | 0.0500     | 0.1412    | 0.7230 |
| A D   | -0.1800 | 0.1581    | -0.0124  | 0.0822    | -0.1676    | 0.1782    | 0.3470 |
| A E * | 0.0153  | 0.0462    | -0.4116  | 0.3129    | 0.4269     | 0.3162    | 0.1770 |
| A F   | -0.0099 | 0.1544    | 0.2915   | 0.1273    | -0.3013    | 0.2004    | 0.1330 |
| B C * | 0.0200  | 0.0895    | -0.1480  | 81.0544   | 0.1680     | 81.0545   | 0.9980 |
| C G * | 0.0740  | 0.0524    | -0.0099  | 41.2595   | 0.0839     | 41.2596   | 0.9980 |
| D G   | 0.1038  | 0.0644    | 0.1628   | 0.1508    | -0.0590    | 0.1640    | 0.7190 |
| D F   | 0.1681  | 0.1576    | 0.2518   | 0.1376    | -0.0837    | 0.2095    | 0.6900 |
| E G   | 0.0881  | 0.0502    | -0.2079  | 0.1535    | 0.2960     | 0.1617    | 0.0670 |
| F G   | -0.2000 | 0.1246    | 0.0193   | 0.1402    | -0.2193    | 0.1876    | 0.2420 |

**A** = Mediterranean diet; **B** = Dietary Approaches to Stop Hypertension; **C** = Dietary guidelines-based diets; **D** = plant-based diets; **E** = low fat diet; **F** = low carbohydrate high fat diet; **G** = western habitual diet

\*All the evidence about these contrasts comes from the trials which directly compare them

**Supplementary Table S31.** Side-splitting approach assessing inconsistency for glucose

| Side  | Direct    |           | Indirect  |           | Difference |           |       |
|-------|-----------|-----------|-----------|-----------|------------|-----------|-------|
|       | Coef.     | Std. Err. | Coef.     | Std. Err. | Coef.      | Std. Err. | P>z   |
| A K   | 0.041479  | 0.036829  | 0.068578  | 0.077788  | -0.0271    | 0.086329  | 0.754 |
| A D   | 0.22      | 0.08915   | 0.036603  | 0.047266  | 0.183397   | 0.100904  | 0.069 |
| A G   | -0.0115   | 0.053182  | 0.035421  | 0.081773  | -0.04692   | 0.096758  | 0.628 |
| B K   | 0.14      | 0.087099  | 0.02303   | 0.086344  | 0.11697    | 0.122644  | 0.34  |
| B D   | 0.06      | 0.078585  | 0.17697   | 0.09416   | -0.11697   | 0.122645  | 0.34  |
| C D * | 0.02003   | 0.146061  | 0.018839  | 293.354   | 0.001191   | 293.3541  | 1     |
| D K   | -0.01888  | 0.041128  | -0.04813  | 0.073962  | 0.029248   | 0.086287  | 0.735 |
| D G   | 9.22E-05  | 0.076668  | -0.11448  | 0.060746  | 0.114575   | 0.097841  | 0.242 |
| E K * | -4.19E-06 | 0.224268  | 0.302486  | 0.322528  | -0.30249   | 0.306661  | 0.324 |
| F K * | 0.072748  | 0.116610  | 0.194866  | 0.408797  | -0.122118  | 0.437995  | 0.780 |
| F H   | -0.107579 | 0.158313  | -0.064929 | 0.209202  | -0.042651  | 0.264101  | 0.872 |
| G K   | 0.038240  | 0.060898  | 0.053239  | 0.073397  | -0.014999  | 0.097454  | 0.878 |
| H K * | 0.160569  | 0.110343  | 0.396425  | 0.417943  | -0.235856  | 0.434437  | 0.587 |
| J K * | 0.200002  | 0.224268  | -0.102494 | 0.322528  | 0.302496   | 0.306661  | 0.324 |

**A** = Mediterranean diet; **B** = Dietary Approaches to Stop Hypertension; **C** = Paleo diet; **D** = Dietary guidelines-based diets; **E** = low GI / GL diet; **F** = plant-based diets; **G** = low fat diet; **H** = low carbohydrate high fat diet; **J** = high GI / GL diet; **K** = western habitual diet

\*All the evidence about these contrasts comes from the trials which directly compare them



**Supplementary Table S32.** Side-splitting approach assessing inconsistency for insulin

| Side  | Direct   |           | Indirect |           | Difference |           |              |
|-------|----------|-----------|----------|-----------|------------|-----------|--------------|
|       | Coef.    | Std. Err. | Coef.    | Std. Err. | Coef.      | Std. Err. | P>z          |
| A J   | 1.911093 | 1.320989  | 2.152888 | 3.621182  | -0.2418    | 3.857038  | 0.95         |
| A G   | -0.24218 | 1.526745  | -5.22363 | 3.235967  | 4.981458   | 3.584061  | 0.165        |
| B J   | 1        | 3.823079  | 2.395222 | 3.978639  | -1.39522   | 5.517745  | 0.8          |
| B D   | 0.599999 | 3.681548  | -0.79529 | 4.109965  | 1.39529    | 5.517755  | 0.8          |
| C D * | 1.209583 | 2.592567  | -3.47835 | 1200.877  | 4.687932   | 1200.88   | 0.997        |
| D J   | 1.576608 | 1.544956  | 2.568696 | 4.318496  | -0.99209   | 4.597195  | 0.829        |
| D G   | 1.220286 | 3.617674  | -2.55051 | 2.402839  | 3.770791   | 4.342683  | 0.385        |
| E J * | -2.33999 | 5.130763  | 0.503361 | 8.540391  | -2.84335   | 10.60975  | 0.789        |
| G J   | 6.7953   | 2.057686  | -0.27954 | 1.959337  | 7.074842   | 2.851511  | <b>0.013</b> |
| I J * | -1.49996 | 4.307423  | -4.34025 | 9.809142  | 2.84029    | 10.60868  | 0.789        |

**A** = Mediterranean diet; **B** = Dietary Approaches to Stop Hypertension; **C** = Paleo diet; **D** = Dietary guidelines-based diets; **E** = low GI / GL diet; **G** = low fat diet; **I** = high GI / GL diet; **J** = western habitual diet

\*All the evidence about these contrasts comes from the trials which directly compare them

**Supplementary Table S33.** Side-splitting approach assessing inconsistency for HOMA-IR

| Side  | Direct  |           | Indirect |           | Difference |           |        |
|-------|---------|-----------|----------|-----------|------------|-----------|--------|
|       | Coef.   | Std. Err. | Coef.    | Std. Err. | Coef.      | Std. Err. | P>z    |
| A H   | 0.2373  | 0.2488    | 0.2226   | 0.3231    | 0.0147     | 0.3964    | 0.9700 |
| A F   | 0.0583  | 0.1959    | 0.0176   | 0.3365    | 0.0407     | 0.3886    | 0.9170 |
| B C * | 0.6000  | 0.3549    | -0.7487  | 678.5767  | 1.3487     | 678.5769  | 0.9980 |
| C H * | 0.3551  | 0.1456    | 0.3342   | 0.7034    | 0.0209     | 0.7305    | 0.9770 |
| C F   | 0.2349  | 0.2383    | 0.0477   | 0.3299    | 0.1872     | 0.4049    | 0.6440 |
| D H * | 0.1300  | 0.5363    | -0.6700  | 1.1169    | 0.8000     | 1.1152    | 0.4730 |
| F H   | 0.2875  | 0.2127    | -0.0310  | 0.3071    | 0.3185     | 0.3842    | 0.4070 |
| G H * | -0.0900 | 0.5898    | 0.7100   | 1.0327    | -0.8000    | 1.1152    | 0.4730 |

**A** = Mediterranean diet; **B** = Paleo diet; **C** = Dietary guidelines-based diets; **D** = low GI / GL diet; **F** = low fat diet; **G** = high GI / GL diet; **H** = western habitual diet

\*All the evidence about these contrasts comes from the trials which directly compare them

**Supplementary Table S34.** Side-splitting approach assessing inconsistency for hsCRP

| Side  | Direct   |           | Indirect |           | Difference |           |       |
|-------|----------|-----------|----------|-----------|------------|-----------|-------|
|       | Coef.    | Std. Err. | Coef.    | Std. Err. | Coef.      | Std. Err. | P>z   |
| A H   | 0.224738 | 0.260401  | 0.309875 | 0.440396  | -0.08514   | 0.510968  | 0.868 |
| A E   | -0.12    | 0.51015   | 0.334391 | 0.499175  | -0.45439   | 0.713743  | 0.524 |
| A F   | 0.696086 | 0.345232  | -0.15765 | 0.599999  | 0.853736   | 0.68219   | 0.211 |
| A G   | 0.02     | 0.500921  | 0.558915 | 0.545613  | -0.53892   | 0.740686  | 0.467 |
| B D * | 0.07     | 0.500561  | -1.01858 | 641.2795  | 1.088575   | 641.2797  | 0.999 |
| C D * | 0.229324 | 0.512194  | -1.04088 | 837.1506  | 1.270206   | 837.1508  | 0.999 |
| D H * | 0.580334 | 0.297528  | -1.12711 | 1.331612  | 1.707447   | 1.364362  | 0.211 |
| D F   | 0.402453 | 0.606844  | 1.002122 | 0.526682  | -0.59967   | 0.801387  | 0.454 |
| E H   | -0.00249 | 0.452394  | 0.312877 | 0.519266  | -0.31536   | 0.688293  | 0.647 |
| E G   | 0.150922 | 0.489895  | 0.170335 | 0.748945  | -0.01941   | 0.895227  | 0.983 |
| F H   | 0.504001 | 0.641603  | -0.53794 | 0.391419  | 1.041936   | 0.759914  | 0.17  |
| G H   | -0.23024 | 0.521269  | 0.170105 | 0.501619  | -0.40035   | 0.723555  | 0.58  |

**A** = Mediterranean diet; **B** = Dietary Approaches to Stop Hypertension; **C** = Paleo diet; **D** = Dietary guidelines-based diets; **E** = plant-based diets; **F** = low fat diet; **G** = low carbohydrate high fat diet; **H** = western habitual diet

\*All the evidence about these contrasts comes from the trials which directly compare them

**Supplementary Table S35.** Side-splitting approach assessing inconsistency for interleukin-6

| Side  | Direct   |           | Indirect |           | Difference |           |       |
|-------|----------|-----------|----------|-----------|------------|-----------|-------|
|       | Coef.    | Std. Err. | Coef.    | Std. Err. | Coef.      | Std. Err. | P>z   |
| A E * | 0.125326 | 0.23787   | 0.12018  | 390.0671  | 0.005146   | 390.0672  | 1     |
| A D * | 0.35     | 0.330977  | 0.377315 | 744.759   | -0.02732   | 744.759   | 1     |
| B C * | 1.64     | 0.96285   | -0.01215 | 2039.884  | 1.652146   | 2039.885  | 0.999 |
| C E * | -0.06188 | 0.121346  | -0.92217 | 924.4848  | 0.860285   | 924.4848  | 0.999 |

**A** = Mediterranean diet; **B** = Paleo diet; **C** = Dietary guidelines-based diets; **D** = low fat diet; **E** = western habitual diet

\*All the evidence about these contrasts comes from the trials which directly compare them

**Supplementary Table S36.** League table of sensitivity analysis excluding high risk of bias studies for LDL-c<sup>1</sup>

|                                       |                                       |                        |                                       |                        |                                       |                                       |                             |                        |                             |
|---------------------------------------|---------------------------------------|------------------------|---------------------------------------|------------------------|---------------------------------------|---------------------------------------|-----------------------------|------------------------|-----------------------------|
| <i>Mediterranean</i>                  |                                       |                        |                                       |                        |                                       |                                       |                             |                        |                             |
| -0.01<br>(-0.26, 0.24)                | <i>DASH</i>                           |                        |                                       |                        |                                       |                                       |                             |                        |                             |
| -0.22<br>(-0.70, 0.25)                | -0.21<br>(-0.71, 0.28)                | <i>Paleo</i>           |                                       |                        |                                       |                                       |                             |                        |                             |
| -0.09<br>(-0.28, 0.10)                | -0.08<br>(-0.32, 0.16)                | 0.13<br>(-0.30, 0.57)  | <i>DG-based</i>                       |                        |                                       |                                       |                             |                        |                             |
| -0.20<br>(-0.83, 0.43)                | -0.19<br>(-0.84, 0.46)                | 0.02<br>(-0.74, 0.79)  | -0.11<br>(-0.74, 0.52)                | <i>Low GI/GL</i>       |                                       |                                       |                             |                        |                             |
| 0.01<br>(-0.19, 0.21)                 | 0.02<br>(-0.24, 0.29)                 | 0.24<br>(-0.24, 0.72)  | 0.10<br>(-0.11, 0.32)                 | 0.22<br>(-0.42, 0.85)  | <i>Plant-based</i>                    |                                       |                             |                        |                             |
| -0.03<br>(-0.19, 0.13)                | -0.02<br>(-0.27, 0.24)                | 0.20<br>(-0.28, 0.68)  | 0.07<br>(-0.14, 0.27)                 | 0.18<br>(-0.46, 0.81)  | -0.04<br>(-0.25, 0.17)                | <i>Low fat</i>                        |                             |                        |                             |
| <b>-0.35</b><br><b>(-0.67, -0.02)</b> | -0.34<br>(-0.71, 0.03)                | -0.12<br>(-0.67, 0.43) | -0.25<br>(-0.59, 0.08)                | -0.14<br>(-0.83, 0.54) | <b>-0.36</b><br><b>(-0.67, -0.05)</b> | -0.32<br>(-0.66, 0.02)                | <i>Low CHO<br/>high fat</i> |                        |                             |
| -0.25<br>(-0.87, 0.37)                | -0.24<br>(-0.88, 0.40)                | -0.02<br>(-0.78, 0.74) | -0.16<br>(-0.78, 0.47)                | -0.05<br>(-0.25, 0.16) | -0.26<br>(-0.89, 0.36)                | -0.22<br>(-0.85, 0.40)                | 0.10<br>(-0.58, 0.77)       | <i>High GI/GL</i>      |                             |
| <b>-0.26</b><br><b>(-0.40, -0.13)</b> | <b>-0.25</b><br><b>(-0.47, -0.04)</b> | -0.04<br>(-0.50, 0.42) | <b>-0.17</b><br><b>(-0.32, -0.01)</b> | -0.06<br>(-0.67, 0.55) | <b>-0.27</b><br><b>(-0.44, -0.11)</b> | <b>-0.24</b><br><b>(-0.40, -0.07)</b> | 0.09<br>(-0.22, 0.39)       | -0.01<br>(-0.62, 0.59) | <i>Western<br/>habitual</i> |

<sup>1</sup>The values correspond to the mean difference (95% CI) in LDL-c (mmol/L) between the column dietary pattern and the row dietary pattern; column minus row. Values in bold are effect sizes that are statistically significant at level of 0.05.

*Abbreviations:* CHO, carbohydrate; DASH, Dietary Approaches to Stop Hypertension; DG, dietary guidelines; GI/GL, glycemic index/glycemic load

**Supplementary Table S37.** League table of sensitivity analysis excluding high risk of bias studies for HDL-c<sup>1</sup>

|                                       |                                       |                        |                                       |                        |                                       |                                       |                                   |                        |                                   |
|---------------------------------------|---------------------------------------|------------------------|---------------------------------------|------------------------|---------------------------------------|---------------------------------------|-----------------------------------|------------------------|-----------------------------------|
| <i>Mediterranean</i>                  |                                       |                        |                                       |                        |                                       |                                       |                                   |                        |                                   |
| <b>0.08</b><br><b>(0.01, 0.15)</b>    | <i>DASH</i>                           |                        |                                       |                        |                                       |                                       |                                   |                        |                                   |
| -0.06<br>(-0.21, 0.08)                | -0.14<br>(-0.29, 0.01)                | <i>Paleo</i>           |                                       |                        |                                       |                                       |                                   |                        |                                   |
| 0.04<br>(-0.01, 0.09)                 | -0.04<br>(-0.10, 0.03)                | 0.11<br>(-0.03, 0.24)  | <i>DG-based</i>                       |                        |                                       |                                       |                                   |                        |                                   |
| 0.03<br>(-0.22, 0.28)                 | -0.05<br>(-0.30, 0.20)                | 0.09<br>(-0.19, 0.38)  | -0.01<br>(-0.26, 0.24)                | <i>Low GI/GL</i>       |                                       |                                       |                                   |                        |                                   |
| <b>0.08</b><br><b>(0.02, 0.14)</b>    | 0.00<br>(-0.07, 0.07)                 | 0.14<br>(-0.01, 0.29)  | 0.04<br>(-0.02, 0.10)                 | 0.05<br>(-0.20, 0.30)  | <i>Plant-based</i>                    |                                       |                                   |                        |                                   |
| 0.05<br>(-0.01, 0.11)                 | -0.03<br>(-0.10, 0.05)                | 0.12<br>(-0.03, 0.27)  | 0.01<br>(-0.05, 0.07)                 | 0.02<br>(-0.23, 0.27)  | -0.03<br>(-0.09, 0.03)                | <i>Low fat</i>                        |                                   |                        |                                   |
| <b>-0.11</b><br><b>(-0.22, -0.01)</b> | <b>-0.19</b><br><b>(-0.30, -0.08)</b> | -0.05<br>(-0.22, 0.13) | <b>-0.15</b><br><b>(-0.26, -0.04)</b> | -0.14<br>(-0.40, 0.12) | <b>-0.19</b><br><b>(-0.29, -0.09)</b> | <b>-0.16</b><br><b>(-0.27, -0.05)</b> | <i>Low CHO</i><br><i>high fat</i> |                        |                                   |
| 0.01<br>(-0.24, 0.25)                 | -0.07<br>(-0.32, 0.18)                | 0.07<br>(-0.21, 0.35)  | -0.04<br>(-0.28, 0.21)                | -0.02<br>(-0.08, 0.04) | -0.07<br>(-0.32, 0.18)                | -0.05<br>(-0.29, 0.20)                | 0.12<br>(-0.15, 0.38)             | <i>High GI/GL</i>      |                                   |
| -0.02<br>(-0.06, 0.03)                | <b>-0.09</b><br><b>(-0.15, -0.04)</b> | 0.05<br>(-0.10, 0.19)  | <b>-0.06</b><br><b>(-0.10, -0.01)</b> | -0.05<br>(-0.29, 0.20) | <b>-0.10</b><br><b>(-0.14, -0.05)</b> | <b>-0.07</b><br><b>(-0.12, -0.02)</b> | 0.09<br>(-0.01, 0.19)             | -0.02<br>(-0.27, 0.22) | <i>Western</i><br><i>habitual</i> |

<sup>1</sup>The values correspond to the mean difference (95% CI) in HDL-c (mmol/L) between the column dietary pattern and the row dietary pattern; column minus row. Values in bold are effect sizes that are statistically significant at level of 0.05.

*Abbreviations:* CHO, carbohydrate; DASH, Dietary Approaches to Stop Hypertension; DG, dietary guidelines; GI/GL, glycemic index/glycemic load

**Supplementary Table S38.** League table of sensitivity analysis excluding high risk of bias studies for total cholesterol<sup>1</sup>

|                                       |                                       |                        |                                       |                        |                                       |                                       |                             |                        |                             |
|---------------------------------------|---------------------------------------|------------------------|---------------------------------------|------------------------|---------------------------------------|---------------------------------------|-----------------------------|------------------------|-----------------------------|
| <i>Mediterranean</i>                  |                                       |                        |                                       |                        |                                       |                                       |                             |                        |                             |
| 0.08<br>(-0.23, 0.39)                 | <i>DASH</i>                           |                        |                                       |                        |                                       |                                       |                             |                        |                             |
| -0.23<br>(-0.79, 0.33)                | -0.31<br>(-0.90, 0.28)                | <i>Paleo</i>           |                                       |                        |                                       |                                       |                             |                        |                             |
| -0.04<br>(-0.27, 0.20)                | -0.12<br>(-0.42, 0.18)                | 0.20<br>(-0.31, 0.70)  | <i>DG-based</i>                       |                        |                                       |                                       |                             |                        |                             |
| -0.10<br>(-0.92, 0.71)                | -0.19<br>(-1.03, 0.66)                | 0.13<br>(-0.84, 1.09)  | -0.07<br>(-0.89, 0.75)                | <i>Low GI/GL</i>       |                                       |                                       |                             |                        |                             |
| 0.08<br>(-0.18, 0.34)                 | -0.00<br>(-0.34, 0.34)                | 0.31<br>(-0.26, 0.88)  | 0.12<br>(-0.15, 0.38)                 | 0.19<br>(-0.64, 1.01)  | <i>Plant-based</i>                    |                                       |                             |                        |                             |
| 0.04<br>(-0.17, 0.25)                 | -0.04<br>(-0.36, 0.28)                | 0.27<br>(-0.30, 0.84)  | 0.08<br>(-0.18, 0.34)                 | 0.14<br>(-0.68, 0.97)  | -0.04<br>(-0.31, 0.23)                | <i>Low fat</i>                        |                             |                        |                             |
| -0.40<br>(-0.82, 0.02)                | <b>-0.48</b><br><b>(-0.95, -0.00)</b> | -0.16<br>(-0.83, 0.50) | -0.36<br>(-0.79, 0.07)                | -0.29<br>(-1.18, 0.60) | <b>-0.48</b><br><b>(-0.88, -0.08)</b> | -0.44<br>(-0.87, 0.00)                | <i>Low CHO<br/>high fat</i> |                        |                             |
| -0.24<br>(-1.06, 0.58)                | -0.32<br>(-1.16, 0.52)                | -0.01<br>(-0.97, 0.95) | -0.20<br>(-1.02, 0.62)                | -0.14<br>(-0.44, 0.17) | -0.32<br>(-1.15, 0.50)                | -0.28<br>(-1.10, 0.55)                | 0.16<br>(-0.73, 1.05)       | <i>High GI/GL</i>      |                             |
| <b>-0.27</b><br><b>(-0.44, -0.10)</b> | <b>-0.35</b><br><b>(-0.62, -0.08)</b> | -0.04<br>(-0.58, 0.50) | <b>-0.24</b><br><b>(-0.42, -0.05)</b> | -0.17<br>(-0.97, 0.63) | <b>-0.35</b><br><b>(-0.56, -0.14)</b> | <b>-0.31</b><br><b>(-0.52, -0.10)</b> | 0.12<br>(-0.27, 0.52)       | -0.03<br>(-0.83, 0.77) | <i>Western<br/>habitual</i> |

<sup>1</sup>The values correspond to the mean difference (95% CI) in total cholesterol (mmol/L) between the column dietary pattern and the row dietary pattern; column minus row. Values in bold are effect sizes that are statistically significant at level of 0.05.

*Abbreviations:* CHO, carbohydrate; DASH, Dietary Approaches to Stop Hypertension; DG, dietary guidelines; GI/GL, glycemic index/glycemic load

**Supplementary Table S39.** League table of sensitivity analysis excluding high risk of bias studies for triglycerides<sup>1</sup>

|                        |                        |                        |                        |                        |                                    |                        |                             |                       |                             |
|------------------------|------------------------|------------------------|------------------------|------------------------|------------------------------------|------------------------|-----------------------------|-----------------------|-----------------------------|
| <i>Mediterranean</i>   |                        |                        |                        |                        |                                    |                        |                             |                       |                             |
| -0.02<br>(-0.16, 0.13) | <i>DASH</i>            |                        |                        |                        |                                    |                        |                             |                       |                             |
| -0.04<br>(-0.24, 0.16) | -0.03<br>(-0.25, 0.20) | <i>Paleo</i>           |                        |                        |                                    |                        |                             |                       |                             |
| -0.05<br>(-0.15, 0.04) | -0.04<br>(-0.18, 0.10) | -0.01<br>(-0.18, 0.16) | <i>DG-based</i>        |                        |                                    |                        |                             |                       |                             |
| -0.22<br>(-0.71, 0.28) | -0.20<br>(-0.71, 0.31) | -0.17<br>(-0.70, 0.36) | -0.16<br>(-0.66, 0.34) | <i>Low GI/GL</i>       |                                    |                        |                             |                       |                             |
| -0.10<br>(-0.21, 0.01) | -0.08<br>(-0.24, 0.07) | -0.05<br>(-0.26, 0.15) | -0.04<br>(-0.16, 0.07) | 0.12<br>(-0.38, 0.62)  | <i>Plant-based</i>                 |                        |                             |                       |                             |
| -0.06<br>(-0.16, 0.04) | -0.04<br>(-0.19, 0.11) | -0.01<br>(-0.22, 0.19) | -0.00<br>(-0.11, 0.11) | 0.16<br>(-0.34, 0.66)  | 0.04<br>(-0.07, 0.15)              | <i>Low fat</i>         |                             |                       |                             |
| 0.12<br>(-0.09, 0.34)  | 0.14<br>(-0.11, 0.39)  | 0.17<br>(-0.12, 0.45)  | 0.18<br>(-0.05, 0.40)  | 0.34<br>(-0.20, 0.87)  | <b>0.22</b><br><b>(0.01, 0.44)</b> | 0.18<br>(-0.05, 0.41)  | <i>Low CHO<br/>high fat</i> |                       |                             |
| -0.26<br>(-0.76, 0.23) | -0.25<br>(-0.76, 0.26) | -0.22<br>(-0.75, 0.31) | -0.21<br>(-0.71, 0.29) | -0.05<br>(-0.16, 0.06) | -0.17<br>(-0.67, 0.33)             | -0.21<br>(-0.71, 0.29) | -0.39<br>(-0.92, 0.15)      | <i>High GI/GL</i>     |                             |
| -0.04<br>(-0.12, 0.04) | -0.02<br>(-0.15, 0.11) | 0.00<br>(-0.19, 0.20)  | 0.02<br>(-0.07, 0.10)  | 0.18<br>(-0.32, 0.67)  | 0.06<br>(-0.03, 0.15)              | 0.02<br>(-0.08, 0.11)  | -0.16<br>(-0.37, 0.05)      | 0.22<br>(-0.27, 0.72) | <i>Western<br/>habitual</i> |

<sup>1</sup>The values correspond to the mean difference (95% CI) in triglycerides (mmol/L) between the column dietary pattern and the row dietary pattern; column minus row. Values in bold are effect sizes that are statistically significant at level of 0.05.

*Abbreviations:* CHO, carbohydrate; DASH, Dietary Approaches to Stop Hypertension; DG, dietary guidelines; GI/GL, glycemic index/glycemic load



**Supplementary Table S40.** League table of sensitivity analysis excluding high risk of bias studies for ApoB<sup>1</sup>

|                                       |                                       |                                       |                                       |                                       |                         |                         |
|---------------------------------------|---------------------------------------|---------------------------------------|---------------------------------------|---------------------------------------|-------------------------|-------------------------|
| <i>Mediterranean</i>                  |                                       |                                       |                                       |                                       |                         |                         |
| 0.04<br>(-0.07, 0.15)                 | <i>DASH</i>                           |                                       |                                       |                                       |                         |                         |
| 0.02<br>(-0.07, 0.11)                 | -0.02<br>(-0.09, 0.05)                | <i>DG-based</i>                       |                                       |                                       |                         |                         |
| -0.03<br>(-0.10, 0.05)                | -0.07<br>(-0.18, 0.04)                | -0.05<br>(-0.14, 0.04)                | <i>Plant-based</i>                    |                                       |                         |                         |
| 0.02<br>(-0.03, 0.07)                 | -0.02<br>(-0.14, 0.09)                | -0.00<br>(-0.09, 0.09)                | 0.05<br>(-0.03, 0.13)                 | <i>Low fat</i>                        |                         |                         |
| <b>-0.16</b><br><b>(-0.29, -0.02)</b> | <b>-0.20</b><br><b>(-0.36, -0.03)</b> | <b>-0.18</b><br><b>(-0.33, -0.03)</b> | -0.13<br>(-0.27, 0.01)                | <b>-0.18</b><br><b>(-0.32, -0.03)</b> | <i>Low CHO high fat</i> |                         |
| <b>-0.10</b><br><b>(-0.15, -0.05)</b> | <b>-0.14</b><br><b>(-0.24, -0.04)</b> | <b>-0.12</b><br><b>(-0.19, -0.05)</b> | <b>-0.07</b><br><b>(-0.12, -0.01)</b> | <b>-0.12</b><br><b>(-0.17, -0.06)</b> | 0.06<br>(-0.07, 0.19)   | <i>Western habitual</i> |

<sup>1</sup>The values correspond to the mean difference (95% CI) in ApoB (g/L) between the column dietary pattern and the row dietary pattern; column minus row. Values in bold are effect sizes that are statistically significant at level of 0.05.

*Abbreviations:* CHO, carbohydrate; DASH, Dietary Approaches to Stop Hypertension; DG, dietary guidelines

**Supplementary Table S41.** League table of sensitivity analysis excluding high risk of bias studies for ApoA1<sup>1</sup>

|                        |                                       |                                       |                                       |                        |                         |                         |
|------------------------|---------------------------------------|---------------------------------------|---------------------------------------|------------------------|-------------------------|-------------------------|
| <i>Mediterranean</i>   |                                       |                                       |                                       |                        |                         |                         |
| 0.09<br>(-0.13, 0.31)  | <i>DASH</i>                           |                                       |                                       |                        |                         |                         |
| 0.07<br>(-0.08, 0.22)  | -0.02<br>(-0.17, 0.13)                | <i>DG-based</i>                       |                                       |                        |                         |                         |
| 0.05<br>(-0.09, 0.19)  | -0.04<br>(-0.25, 0.17)                | -0.02<br>(-0.17, 0.13)                | <i>Plant-based</i>                    |                        |                         |                         |
| -0.03<br>(-0.13, 0.06) | -0.12<br>(-0.34, 0.09)                | -0.10<br>(-0.26, 0.05)                | -0.08<br>(-0.23, 0.06)                | <i>Low fat</i>         |                         |                         |
| -0.17<br>(-0.36, 0.02) | <b>-0.26</b><br><b>(-0.51, -0.01)</b> | <b>-0.24</b><br><b>(-0.45, -0.04)</b> | <b>-0.22</b><br><b>(-0.41, -0.03)</b> | -0.14<br>(-0.33, 0.06) | <i>Low CHO high fat</i> |                         |
| -0.07<br>(-0.17, 0.04) | -0.16<br>(-0.34, 0.03)                | <b>-0.14</b><br><b>(-0.25, -0.02)</b> | <b>-0.11</b><br><b>(-0.21, -0.01)</b> | -0.03<br>(-0.14, 0.08) | 0.11<br>(-0.07, 0.28)   | <i>Western habitual</i> |

<sup>1</sup>The values correspond to the mean difference (95% CI) in ApoA1 (g/L) between the column dietary pattern and the row dietary pattern; column minus row. Values in bold are effect sizes that are statistically significant at level of 0.05.

*Abbreviations:* CHO, carbohydrate; DASH, Dietary Approaches to Stop Hypertension; DG, dietary guidelines

**Supplementary Table S42.** League table of sensitivity analysis excluding high risk of bias studies for glucose<sup>1</sup>

|                        |                        |                        |                       |                        |                        |                        |                             |                        |                        |                             |
|------------------------|------------------------|------------------------|-----------------------|------------------------|------------------------|------------------------|-----------------------------|------------------------|------------------------|-----------------------------|
| <i>Mediterranean</i>   |                        |                        |                       |                        |                        |                        |                             |                        |                        |                             |
| 0.05<br>(-0.10, 0.19)  | <i>DASH</i>            |                        |                       |                        |                        |                        |                             |                        |                        |                             |
| -0.04<br>(-0.34, 0.26) | -0.09<br>(-0.40, 0.23) | <i>Paleo</i>           |                       |                        |                        |                        |                             |                        |                        |                             |
| -0.06<br>(-0.15, 0.03) | -0.11<br>(-0.23, 0.02) | -0.02<br>(-0.31, 0.27) | <i>DG-based</i>       |                        |                        |                        |                             |                        |                        |                             |
| 0.03<br>(-0.40, 0.46)  | -0.02<br>(-0.46, 0.42) | 0.07<br>(-0.45, 0.58)  | 0.09<br>(-0.34, 0.52) | <i>Low GI/GL</i>       |                        |                        |                             |                        |                        |                             |
| 0.05<br>(-0.18, 0.28)  | 0.00<br>(-0.25, 0.25)  | 0.09<br>(-0.28, 0.45)  | 0.11<br>(-0.12, 0.33) | 0.02<br>(-0.45, 0.49)  | <i>Plant-based</i>     |                        |                             |                        |                        |                             |
| 0.03<br>(-0.08, 0.14)  | -0.01<br>(-0.18, 0.15) | 0.07<br>(-0.24, 0.38)  | 0.09<br>(-0.02, 0.21) | 0.00<br>(-0.43, 0.44)  | -0.02<br>(-0.26, 0.23) | <i>Low fat</i>         |                             |                        |                        |                             |
| 0.14<br>(-0.08, 0.36)  | 0.09<br>(-0.15, 0.34)  | 0.18<br>(-0.19, 0.54)  | 0.20<br>(-0.02, 0.42) | 0.11<br>(-0.36, 0.58)  | 0.09<br>(-0.16, 0.34)  | 0.11<br>(-0.13, 0.35)  | <i>Low CHO<br/>high fat</i> |                        |                        |                             |
| 0.04<br>(-0.13, 0.22)  | -0.00<br>(-0.21, 0.20) | 0.08<br>(-0.26, 0.42)  | 0.10<br>(-0.07, 0.28) | 0.02<br>(-0.44, 0.47)  | -0.00<br>(-0.27, 0.26) | 0.01<br>(-0.19, 0.21)  | -0.10<br>(-0.36, 0.17)      | <i>Mexican</i>         |                        |                             |
| 0.10<br>(-0.33, 0.53)  | 0.05<br>(-0.39, 0.49)  | 0.14<br>(-0.38, 0.66)  | 0.16<br>(-0.27, 0.59) | 0.07<br>(-0.04, 0.18)  | 0.05<br>(-0.42, 0.52)  | 0.07<br>(-0.37, 0.50)  | -0.04<br>(-0.51, 0.43)      | 0.06<br>(-0.40, 0.51)  | <i>High GI/GL</i>      |                             |
| -0.04<br>(-0.11, 0.04) | -0.08<br>(-0.21, 0.04) | 0.00<br>(-0.29, 0.30)  | 0.02<br>(-0.05, 0.09) | -0.06<br>(-0.49, 0.36) | -0.08<br>(-0.30, 0.13) | -0.07<br>(-0.18, 0.05) | -0.18<br>(-0.39, 0.03)      | -0.08<br>(-0.24, 0.08) | -0.14<br>(-0.56, 0.29) | <i>Western<br/>habitual</i> |

<sup>1</sup>The values correspond to the mean difference (95% CI) in glucose (mmol/L) between the column dietary pattern and the row dietary pattern; column minus row.

*Abbreviations:* CHO, carbohydrate; DASH, Dietary Approaches to Stop Hypertension; DG, dietary guidelines; GI/GL, glycemic index/glycemic load

**Supplementary Table S43.** League table of sensitivity analysis excluding high risk of bias studies for insulin<sup>1</sup>

|                                    |                                       |                                       |                                       |                        |                        |                        |                             |                       |                             |
|------------------------------------|---------------------------------------|---------------------------------------|---------------------------------------|------------------------|------------------------|------------------------|-----------------------------|-----------------------|-----------------------------|
| <i>Mediterranean</i>               |                                       |                                       |                                       |                        |                        |                        |                             |                       |                             |
| <b>1.76</b><br><b>(0.40, 3.12)</b> | <i>DASH</i>                           |                                       |                                       |                        |                        |                        |                             |                       |                             |
| <b>2.26</b><br><b>(0.77, 3.74)</b> | 0.50<br>(-1.13, 2.13)                 | <i>Paleo</i>                          |                                       |                        |                        |                        |                             |                       |                             |
| <b>1.33</b><br><b>(0.43, 2.23)</b> | -0.43<br>(-1.52, 0.67)                | -0.92<br>(-2.11, 0.26)                | <i>DG-based</i>                       |                        |                        |                        |                             |                       |                             |
| -1.39<br>(-5.97, 3.19)             | -3.15<br>(-7.83, 1.52)                | -3.65<br>(-8.38, 1.08)                | -2.72<br>(-7.30, 1.85)                | <i>Low GI/GL</i>       |                        |                        |                             |                       |                             |
| -1.24<br>(-4.64, 2.15)             | -3.00<br>(-6.53, 0.52)                | -3.50<br>(-7.09, 0.09)                | -2.58<br>(-5.96, 0.81)                | 0.15<br>(-5.45, 5.75)  | <i>Plant-based</i>     |                        |                             |                       |                             |
| 0.19<br>(-0.43, 0.81)              | <b>-1.57</b><br><b>(-2.95, -0.19)</b> | <b>-2.07</b><br><b>(-3.56, -0.58)</b> | <b>-1.14</b><br><b>(-2.05, -0.24)</b> | 1.58<br>(-3.02, 6.18)  | 1.43<br>(-1.99, 4.85)  | <i>Low fat</i>         |                             |                       |                             |
| 0.65<br>(-3.06, 4.36)              | -1.11<br>(-4.94, 2.73)                | -1.60<br>(-5.50, 2.29)                | -0.68<br>(-4.39, 3.02)                | 2.04<br>(-3.76, 7.84)  | 1.90<br>(-1.26, 5.05)  | 0.46<br>(-3.27, 4.20)  | <i>Low CHO<br/>high fat</i> |                       |                             |
| -1.59<br>(-6.12, 2.95)             | -3.34<br>(-7.98, 1.29)                | -3.84<br>(-8.53, 0.85)                | -2.92<br>(-7.45, 1.62)                | -0.19<br>(-0.96, 0.57) | -0.34<br>(-5.91, 5.23) | -1.77<br>(-6.33, 2.78) | -2.24<br>(-8.00, 3.53)      | <i>High GI/GL</i>     |                             |
| 0.10<br>(-0.63, 0.84)              | <b>-1.65</b><br><b>(-2.87, -0.44)</b> | <b>-2.15</b><br><b>(-3.54, -0.76)</b> | <b>-1.23</b><br><b>(-1.94, -0.52)</b> | 1.50<br>(-3.02, 6.01)  | 1.35<br>(-1.96, 4.66)  | -0.08<br>(-0.93, 0.76) | -0.55<br>(-4.18, 3.09)      | 1.69<br>(-2.79, 6.17) | <i>Western<br/>habitual</i> |

<sup>1</sup>The values correspond to the mean difference (95% CI) in insulin (mU/L) between the column dietary pattern and the row dietary pattern; column minus row. Values in bold are effect sizes that are statistically significant at level of 0.05.

*Abbreviations:* CHO, carbohydrate; DASH, Dietary Approaches to Stop Hypertension; DG, dietary guidelines; GI/GL, glycemic index/glycemic load

**Supplementary Table S44.** League table of sensitivity analysis excluding high risk of bias studies for hsCRP<sup>1</sup>

|                                    |                                       |                                       |                                       |                        |                        |                                   |                                   |
|------------------------------------|---------------------------------------|---------------------------------------|---------------------------------------|------------------------|------------------------|-----------------------------------|-----------------------------------|
| <i>Mediterranean</i>               |                                       |                                       |                                       |                        |                        |                                   |                                   |
| <b>0.81</b><br><b>(0.10, 1.52)</b> | <i>DASH</i>                           |                                       |                                       |                        |                        |                                   |                                   |
| <b>0.96</b><br><b>(0.00, 1.91)</b> | 0.14<br>(-0.78, 1.07)                 | <i>Paleo</i>                          |                                       |                        |                        |                                   |                                   |
| <b>0.74</b><br><b>(0.21, 1.27)</b> | -0.07<br>(-0.54, 0.40)                | -0.21<br>(-1.01, 0.58)                | <i>DG-based</i>                       |                        |                        |                                   |                                   |
| -0.05<br>(-0.27, 0.17)             | <b>-0.86</b><br><b>(-1.55, -0.17)</b> | <b>-1.01</b><br><b>(-1.95, -0.07)</b> | <b>-0.79</b><br><b>(-1.29, -0.29)</b> | <i>Plant-based</i>     |                        |                                   |                                   |
| 0.17<br>(-0.39, 0.73)              | -0.64<br>(-1.42, 0.14)                | -0.79<br>(-1.80, 0.22)                | -0.57<br>(-1.19, 0.05)                | 0.22<br>(-0.35, 0.79)  | <i>Low fat</i>         |                                   |                                   |
| -0.15<br>(-0.47, 0.18)             | <b>-0.96</b><br><b>(-1.71, -0.21)</b> | <b>-1.10</b><br><b>(-2.09, -0.12)</b> | <b>-0.89</b><br><b>(-1.47, -0.31)</b> | -0.10<br>(-0.41, 0.21) | -0.32<br>(-0.94, 0.31) | <i>Low CHO</i><br><i>high fat</i> |                                   |
| -0.10<br>(-0.32, 0.11)             | <b>-0.92</b><br><b>(-1.60, -0.23)</b> | <b>-1.06</b><br><b>(-2.00, -0.12)</b> | <b>-0.85</b><br><b>(-1.34, -0.35)</b> | -0.05<br>(-0.11, 0.00) | -0.27<br>(-0.84, 0.29) | 0.04<br>(-0.26, 0.35)             | <i>Western</i><br><i>habitual</i> |

<sup>1</sup>The values correspond to the mean difference (95% CI) in hsCRP (mg/L) between the column dietary pattern and the row dietary pattern; column minus row. Values in bold are effect sizes that are statistically significant at level of 0.05.

*Abbreviations:* CHO, carbohydrate; DASH, Dietary Approaches to Stop Hypertension; DG, dietary guidelines; hsCRP, high sensitivity C-reactive protein

**Supplementary Table S45.** League table of sensitivity analysis excluding high risk of bias studies for interleukin-6<sup>1</sup>

|                        |                        |                       |                         |
|------------------------|------------------------|-----------------------|-------------------------|
| <i>Mediterranean</i>   |                        |                       |                         |
| 1.51<br>(-0.47, 3.50)  | <i>Paleo</i>           |                       |                         |
| -0.13<br>(-0.73, 0.48) | -1.64<br>(-3.53, 0.25) | <i>DG-based</i>       |                         |
| -0.13<br>(-0.59, 0.34) | -1.64<br>(-3.57, 0.29) | 0.00<br>(-0.39, 0.39) | <i>Western habitual</i> |

<sup>1</sup>The values correspond to the mean difference (95% CI) in interleukin-6 (pg/mL) between the column dietary pattern and the row dietary pattern; column minus row. Values in bold are effect sizes that are statistically significant at level of 0.05.

*Abbreviations:* DG, dietary guidelines

**Supplementary Table S46.** League table of sensitivity analysis excluding studies with intervention duration longer than 52 weeks for LDL-c<sup>1</sup>

|                                       |                                       |                        |                                       |                        |                                       |                                       |                             |                        |                             |
|---------------------------------------|---------------------------------------|------------------------|---------------------------------------|------------------------|---------------------------------------|---------------------------------------|-----------------------------|------------------------|-----------------------------|
| <i>Mediterranean</i>                  |                                       |                        |                                       |                        |                                       |                                       |                             |                        |                             |
| 0.02<br>(-0.22, 0.26)                 | <i>DASH</i>                           |                        |                                       |                        |                                       |                                       |                             |                        |                             |
| -0.20<br>(-0.85, 0.45)                | -0.21<br>(-0.88, 0.45)                | <i>Paleo</i>           |                                       |                        |                                       |                                       |                             |                        |                             |
| -0.03<br>(-0.23, 0.17)                | -0.04<br>(-0.28, 0.19)                | 0.17<br>(-0.45, 0.79)  | <i>DG-based</i>                       |                        |                                       |                                       |                             |                        |                             |
| -0.19<br>(-0.81, 0.43)                | -0.21<br>(-0.85, 0.43)                | 0.01<br>(-0.87, 0.89)  | -0.16<br>(-0.79, 0.46)                | <i>Low GI/GL</i>       |                                       |                                       |                             |                        |                             |
| 0.03<br>(-0.16, 0.23)                 | 0.01<br>(-0.24, 0.27)                 | 0.23<br>(-0.43, 0.88)  | 0.06<br>(-0.15, 0.27)                 | 0.22<br>(-0.40, 0.85)  | <i>Plant-based</i>                    |                                       |                             |                        |                             |
| 0.01<br>(-0.14, 0.15)                 | -0.01<br>(-0.25, 0.23)                | 0.20<br>(-0.45, 0.86)  | 0.03<br>(-0.17, 0.24)                 | 0.20<br>(-0.42, 0.82)  | -0.03<br>(-0.22, 0.17)                | <i>Low fat</i>                        |                             |                        |                             |
| <b>-0.33</b><br><b>(-0.65, -0.01)</b> | -0.35<br>(-0.71, 0.02)                | -0.13<br>(-0.84, 0.57) | -0.30<br>(-0.64, 0.03)                | -0.14<br>(-0.81, 0.54) | <b>-0.36</b><br><b>(-0.66, -0.06)</b> | <b>-0.34</b><br><b>(-0.66, -0.01)</b> | <i>Low CHO<br/>high fat</i> |                        |                             |
| -0.23<br>(-0.84, 0.37)                | -0.25<br>(-0.88, 0.38)                | -0.04<br>(-0.91, 0.84) | -0.21<br>(-0.82, 0.41)                | -0.04<br>(-0.25, 0.16) | -0.27<br>(-0.88, 0.35)                | -0.24<br>(-0.85, 0.37)                | 0.09<br>(-0.57, 0.76)       | <i>High GI/GL</i>      |                             |
| <b>-0.25</b><br><b>(-0.38, -0.12)</b> | <b>-0.27</b><br><b>(-0.47, -0.06)</b> | -0.05<br>(-0.69, 0.59) | <b>-0.22</b><br><b>(-0.38, -0.06)</b> | -0.06<br>(-0.66, 0.55) | <b>-0.28</b><br><b>(-0.44, -0.12)</b> | <b>-0.26</b><br><b>(-0.41, -0.11)</b> | 0.08<br>(-0.22, 0.38)       | -0.02<br>(-0.61, 0.58) | <i>Western<br/>habitual</i> |

<sup>1</sup>The values correspond to the mean difference (95% CI) in LDL-c (mmol/L) between the column dietary pattern and the row dietary pattern; column minus row. Values in bold are effect sizes that are statistically significant at level of 0.05.

*Abbreviations:* CHO, carbohydrate; DASH, Dietary Approaches to Stop Hypertension; DG, dietary guidelines; GI/GL, glycemic index/glycemic load

**Supplementary Table S47.** League table of sensitivity analysis excluding studies with intervention duration longer than 52 weeks for HDL-c<sup>1</sup>

|                                       |                                       |                        |                                       |                        |                                       |                                       |                             |                        |                             |
|---------------------------------------|---------------------------------------|------------------------|---------------------------------------|------------------------|---------------------------------------|---------------------------------------|-----------------------------|------------------------|-----------------------------|
| <i>Mediterranean</i>                  |                                       |                        |                                       |                        |                                       |                                       |                             |                        |                             |
| 0.05<br>(-0.01, 0.12)                 | <i>DASH</i>                           |                        |                                       |                        |                                       |                                       |                             |                        |                             |
| 0.01<br>(-0.20, 0.22)                 | -0.04<br>(-0.25, 0.17)                | <i>Paleo</i>           |                                       |                        |                                       |                                       |                             |                        |                             |
| 0.00<br>(-0.06, 0.07)                 | -0.05<br>(-0.12, 0.02)                | -0.01<br>(-0.21, 0.19) | <i>DG-based</i>                       |                        |                                       |                                       |                             |                        |                             |
| 0.01<br>(-0.24, 0.25)                 | -0.05<br>(-0.29, 0.20)                | -0.01<br>(-0.32, 0.31) | 0.00<br>(-0.24, 0.25)                 | <i>Low GI/GL</i>       |                                       |                                       |                             |                        |                             |
| 0.05<br>(-0.00, 0.11)                 | 0.00<br>(-0.06, 0.07)                 | 0.04<br>(-0.17, 0.25)  | 0.05<br>(-0.01, 0.11)                 | 0.05<br>(-0.20, 0.29)  | <i>Plant-based</i>                    |                                       |                             |                        |                             |
| 0.04<br>(-0.00, 0.09)                 | -0.01<br>(-0.08, 0.06)                | 0.03<br>(-0.18, 0.24)  | 0.04<br>(-0.02, 0.11)                 | 0.04<br>(-0.21, 0.28)  | -0.01<br>(-0.07, 0.05)                | <i>Low fat</i>                        |                             |                        |                             |
| <b>-0.14</b><br><b>(-0.24, -0.03)</b> | <b>-0.19</b><br><b>(-0.30, -0.08)</b> | -0.15<br>(-0.37, 0.08) | <b>-0.14</b><br><b>(-0.24, -0.03)</b> | -0.14<br>(-0.40, 0.12) | <b>-0.19</b><br><b>(-0.28, -0.09)</b> | <b>-0.18</b><br><b>(-0.28, -0.07)</b> | <i>Low CHO<br/>high fat</i> |                        |                             |
| -0.02<br>(-0.26, 0.23)                | -0.07<br>(-0.32, 0.18)                | -0.03<br>(-0.35, 0.29) | -0.02<br>(-0.26, 0.23)                | -0.02<br>(-0.08, 0.03) | -0.07<br>(-0.31, 0.17)                | -0.06<br>(-0.31, 0.18)                | 0.12<br>(-0.14, 0.38)       | <i>High GI/GL</i>      |                             |
| -0.04<br>(-0.08, 0.00)                | <b>-0.09</b><br><b>(-0.15, -0.04)</b> | -0.05<br>(-0.26, 0.15) | -0.04<br>(-0.09, 0.01)                | -0.05<br>(-0.29, 0.19) | <b>-0.09</b><br><b>(-0.14, -0.05)</b> | <b>-0.09</b><br><b>(-0.13, -0.04)</b> | 0.09<br>(-0.00, 0.19)       | -0.02<br>(-0.26, 0.22) | <i>Western<br/>habitual</i> |

<sup>1</sup>The values correspond to the mean difference (95% CI) in HDL-c (mmol/L) between the column dietary pattern and the row dietary pattern; column minus row. Values in bold are effect sizes that are statistically significant at level of 0.05.

*Abbreviations:* CHO, carbohydrate; DASH, Dietary Approaches to Stop Hypertension; DG, dietary guidelines; GI/GL, glycemic index/glycemic load



**Supplementary Table S48.** League table of sensitivity analysis excluding studies with intervention duration longer than 52 weeks for total cholesterol<sup>1</sup>

|                                       |                                       |                        |                                       |                        |                                       |                                       |                             |                        |                             |
|---------------------------------------|---------------------------------------|------------------------|---------------------------------------|------------------------|---------------------------------------|---------------------------------------|-----------------------------|------------------------|-----------------------------|
| <i>Mediterranean</i>                  |                                       |                        |                                       |                        |                                       |                                       |                             |                        |                             |
| 0.12<br>(-0.17, 0.42)                 | <i>DASH</i>                           |                        |                                       |                        |                                       |                                       |                             |                        |                             |
| -0.13<br>(-0.90, 0.63)                | -0.26<br>(-1.04, 0.52)                | <i>Paleo</i>           |                                       |                        |                                       |                                       |                             |                        |                             |
| 0.06<br>(-0.18, 0.30)                 | -0.07<br>(-0.35, 0.22)                | 0.19<br>(-0.54, 0.92)  | <i>DG-based</i>                       |                        |                                       |                                       |                             |                        |                             |
| -0.08<br>(-0.87, 0.71)                | -0.21<br>(-1.02, 0.61)                | 0.05<br>(-1.03, 1.13)  | -0.14<br>(-0.94, 0.66)                | <i>Low GI/GL</i>       |                                       |                                       |                             |                        |                             |
| 0.11<br>(-0.13, 0.36)                 | -0.01<br>(-0.33, 0.30)                | 0.25<br>(-0.53, 1.02)  | 0.06<br>(-0.20, 0.31)                 | 0.19<br>(-0.61, 1.00)  | <i>Plant-based</i>                    |                                       |                             |                        |                             |
| 0.08<br>(-0.11, 0.27)                 | -0.04<br>(-0.34, 0.26)                | 0.22<br>(-0.55, 0.98)  | 0.03<br>(-0.22, 0.27)                 | 0.16<br>(-0.63, 0.96)  | -0.03<br>(-0.28, 0.21)                | <i>Low fat</i>                        |                             |                        |                             |
| -0.37<br>(-0.77, 0.04)                | <b>-0.49</b><br><b>(-0.95, -0.04)</b> | -0.24<br>(-1.08, 0.60) | <b>-0.43</b><br><b>(-0.84, -0.01)</b> | -0.29<br>(-1.15, 0.58) | <b>-0.48</b><br><b>(-0.87, -0.10)</b> | <b>-0.45</b><br><b>(-0.87, -0.04)</b> | <i>Low CHO<br/>high fat</i> |                        |                             |
| -0.21<br>(-1.01, 0.58)                | -0.34<br>(-1.15, 0.48)                | -0.08<br>(-1.16, 1.00) | -0.27<br>(-1.07, 0.53)                | -0.13<br>(-0.43, 0.16) | -0.33<br>(-1.13, 0.47)                | -0.30<br>(-1.10, 0.50)                | 0.15<br>(-0.71, 1.02)       | <i>High GI/GL</i>      |                             |
| <b>-0.25</b><br><b>(-0.41, -0.09)</b> | <b>-0.37</b><br><b>(-0.62, -0.12)</b> | -0.12<br>(-0.87, 0.64) | <b>-0.31</b><br><b>(-0.49, -0.12)</b> | -0.17<br>(-0.94, 0.61) | <b>-0.36</b><br><b>(-0.56, -0.16)</b> | <b>-0.33</b><br><b>(-0.52, -0.14)</b> | 0.12<br>(-0.26, 0.50)       | -0.03<br>(-0.81, 0.74) | <i>Western<br/>habitual</i> |

<sup>1</sup>The values correspond to the mean difference (95% CI) in total cholesterol (mmol/L) between the column dietary pattern and the row dietary pattern; column minus row. Values in bold are effect sizes that are statistically significant at level of 0.05.

*Abbreviations:* CHO, carbohydrate; DASH, Dietary Approaches to Stop Hypertension; DG, dietary guidelines; GI/GL, glycemic index/glycemic load

**Supplementary Table S49.** League table of sensitivity analysis excluding studies with intervention duration longer than 52 weeks for triglycerides<sup>1</sup>

|                        |                        |                        |                        |                        |                                    |                        |                         |                       |                         |
|------------------------|------------------------|------------------------|------------------------|------------------------|------------------------------------|------------------------|-------------------------|-----------------------|-------------------------|
| <i>Mediterranean</i>   |                        |                        |                        |                        |                                    |                        |                         |                       |                         |
| 0.04<br>(-0.08, 0.16)  | <i>DASH</i>            |                        |                        |                        |                                    |                        |                         |                       |                         |
| -0.01<br>(-0.21, 0.18) | -0.05<br>(-0.26, 0.16) | <i>Paleo</i>           |                        |                        |                                    |                        |                         |                       |                         |
| 0.05<br>(-0.04, 0.14)  | 0.01<br>(-0.11, 0.12)  | 0.06<br>(-0.12, 0.24)  | <i>DG-based</i>        |                        |                                    |                        |                         |                       |                         |
| -0.17<br>(-0.64, 0.31) | -0.20<br>(-0.69, 0.28) | -0.15<br>(-0.66, 0.36) | -0.21<br>(-0.69, 0.27) | <i>Low GI/GL</i>       |                                    |                        |                         |                       |                         |
| -0.04<br>(-0.12, 0.04) | -0.08<br>(-0.20, 0.04) | -0.03<br>(-0.22, 0.17) | -0.09<br>(-0.17, 0.00) | 0.13<br>(-0.35, 0.60)  | <i>Plant-based</i>                 |                        |                         |                       |                         |
| -0.02<br>(-0.09, 0.05) | -0.06<br>(-0.18, 0.06) | -0.01<br>(-0.20, 0.19) | -0.07<br>(-0.15, 0.02) | 0.14<br>(-0.33, 0.62)  | 0.02<br>(-0.06, 0.09)              | <i>Low fat</i>         |                         |                       |                         |
| 0.17<br>(-0.03, 0.37)  | 0.13<br>(-0.09, 0.35)  | 0.18<br>(-0.09, 0.45)  | 0.12<br>(-0.09, 0.32)  | 0.33<br>(-0.18, 0.84)  | <b>0.21</b><br><b>(0.01, 0.40)</b> | 0.19<br>(-0.01, 0.39)  | <i>Low CHO high fat</i> |                       |                         |
| -0.22<br>(-0.69, 0.26) | -0.25<br>(-0.74, 0.23) | -0.20<br>(-0.71, 0.31) | -0.26<br>(-0.74, 0.22) | -0.05<br>(-0.14, 0.03) | -0.18<br>(-0.65, 0.30)             | -0.19<br>(-0.67, 0.28) | -0.38<br>(-0.89, 0.13)  | <i>High GI/GL</i>     |                         |
| 0.01<br>(-0.05, 0.07)  | -0.03<br>(-0.13, 0.07) | 0.02<br>(-0.17, 0.21)  | -0.04<br>(-0.11, 0.03) | 0.17<br>(-0.30, 0.65)  | 0.05<br>(-0.02, 0.11)              | 0.03<br>(-0.03, 0.09)  | -0.16<br>(-0.35, 0.04)  | 0.23<br>(-0.25, 0.70) | <i>Western habitual</i> |

<sup>1</sup>The values correspond to the mean difference (95% CI) in triglycerides (mmol/L) between the column dietary pattern and the row dietary pattern; column minus row. Values in bold are effect sizes that are statistically significant at level of 0.05.

*Abbreviations:* CHO, carbohydrate; DASH, Dietary Approaches to Stop Hypertension; DG, dietary guidelines; GI/GL, glycemic index/glycemic load

**Supplementary Table S50.** League table of sensitivity analysis excluding studies with intervention duration longer than 52 weeks for glucose<sup>1</sup>

|                        |                        |                       |                       |                        |                        |                        |                             |                        |                        |                             |
|------------------------|------------------------|-----------------------|-----------------------|------------------------|------------------------|------------------------|-----------------------------|------------------------|------------------------|-----------------------------|
| <i>Mediterranean</i>   |                        |                       |                       |                        |                        |                        |                             |                        |                        |                             |
| 0.06<br>(-0.07, 0.20)  | <i>DASH</i>            |                       |                       |                        |                        |                        |                             |                        |                        |                             |
| -0.25<br>(-0.64, 0.15) | -0.31<br>(-0.71, 0.09) | <i>Paleo</i>          |                       |                        |                        |                        |                             |                        |                        |                             |
| -0.04<br>(-0.13, 0.06) | -0.10<br>(-0.22, 0.02) | 0.21<br>(-0.17, 0.59) | <i>DG-based</i>       |                        |                        |                        |                             |                        |                        |                             |
| 0.04<br>(-0.39, 0.46)  | -0.03<br>(-0.46, 0.41) | 0.28<br>(-0.29, 0.86) | 0.07<br>(-0.35, 0.50) | <i>Low GI/GL</i>       |                        |                        |                             |                        |                        |                             |
| 0.06<br>(-0.16, 0.28)  | -0.01<br>(-0.25, 0.23) | 0.30<br>(-0.14, 0.75) | 0.09<br>(-0.13, 0.31) | 0.02<br>(-0.45, 0.49)  | <i>Plant-based</i>     |                        |                             |                        |                        |                             |
| 0.01<br>(-0.07, 0.10)  | -0.05<br>(-0.19, 0.09) | 0.26<br>(-0.14, 0.65) | 0.05<br>(-0.05, 0.14) | -0.03<br>(-0.45, 0.40) | -0.05<br>(-0.27, 0.18) | <i>Low fat</i>         |                             |                        |                        |                             |
| 0.15<br>(-0.06, 0.37)  | 0.09<br>(-0.15, 0.32)  | 0.40<br>(-0.05, 0.84) | 0.19<br>(-0.03, 0.40) | 0.11<br>(-0.35, 0.58)  | 0.09<br>(-0.15, 0.34)  | 0.14<br>(-0.08, 0.36)  | <i>Low CHO<br/>high fat</i> |                        |                        |                             |
| 0.05<br>(-0.11, 0.21)  | -0.01<br>(-0.20, 0.18) | 0.30<br>(-0.12, 0.72) | 0.09<br>(-0.07, 0.25) | 0.02<br>(-0.43, 0.46)  | -0.01<br>(-0.26, 0.25) | 0.04<br>(-0.13, 0.21)  | -0.10<br>(-0.35, 0.15)      | <i>Mexican</i>         |                        |                             |
| 0.11<br>(-0.32, 0.53)  | 0.04<br>(-0.39, 0.48)  | 0.35<br>(-0.22, 0.93) | 0.14<br>(-0.28, 0.57) | 0.07<br>(-0.03, 0.17)  | 0.05<br>(-0.42, 0.52)  | 0.10<br>(-0.33, 0.52)  | -0.04<br>(-0.51, 0.42)      | 0.06<br>(-0.39, 0.50)  | <i>High GI/GL</i>      |                             |
| -0.03<br>(-0.09, 0.04) | -0.09<br>(-0.21, 0.03) | 0.22<br>(-0.17, 0.61) | 0.01<br>(-0.06, 0.08) | -0.06<br>(-0.48, 0.35) | -0.09<br>(-0.29, 0.12) | -0.04<br>(-0.13, 0.05) | -0.18<br>(-0.38, 0.03)      | -0.08<br>(-0.23, 0.07) | -0.14<br>(-0.55, 0.28) | <i>Western<br/>habitual</i> |

<sup>1</sup>The values correspond to the mean difference (95% CI) in glucose (mmol/L) between the column dietary pattern and the row dietary pattern; column minus row.

*Abbreviations:* CHO, carbohydrate; DASH, Dietary Approaches to Stop Hypertension; DG, dietary guidelines; GI/GL, glycemic index/glycemic load

**Supplementary Table S51.** League table of sensitivity analysis excluding studies with intervention duration longer than 52 weeks for insulin<sup>1</sup>

|                         |                         |                         |                         |                          |                          |                         |                             |                       |                             |
|-------------------------|-------------------------|-------------------------|-------------------------|--------------------------|--------------------------|-------------------------|-----------------------------|-----------------------|-----------------------------|
| <i>Mediterranean</i>    |                         |                         |                         |                          |                          |                         |                             |                       |                             |
| -0.24<br>(-6.28, 5.80)  | <i>DASH</i>             |                         |                         |                          |                          |                         |                             |                       |                             |
| 0.34<br>(-7.97, 8.66)   | 0.59<br>(-8.66, 9.83)   | <i>Paleo</i>            |                         |                          |                          |                         |                             |                       |                             |
| -0.22<br>(-3.95, 3.52)  | 0.03<br>(-5.48, 5.53)   | -0.56<br>(-7.99, 6.87)  | <i>DG-based</i>         |                          |                          |                         |                             |                       |                             |
| -3.42<br>(-11.98, 5.14) | -3.18<br>(-13.06, 6.70) | -3.77<br>(-15.20, 7.67) | -3.21<br>(-11.90, 5.48) | <i>Low GI/GL</i>         |                          |                         |                             |                       |                             |
| -3.46<br>(-11.33, 4.40) | -3.22<br>(-12.51, 6.07) | -3.81<br>(-14.73, 7.11) | -3.25<br>(-11.26, 4.76) | -0.04<br>(-11.12, 11.03) | <i>Plant-based</i>       |                         |                             |                       |                             |
| 1.26<br>(-1.84, 4.36)   | 1.50<br>(-4.88, 7.87)   | 0.91<br>(-7.61, 9.43)   | 1.47<br>(-2.70, 5.64)   | 4.68<br>(-4.17, 13.52)   | 4.72<br>(-3.46, 12.90)   | <i>Low fat</i>          |                             |                       |                             |
| -0.80<br>(-8.76, 7.16)  | -0.55<br>(-9.92, 8.82)  | -1.14<br>(-12.13, 9.85) | -0.58<br>(-8.68, 7.52)  | 2.63<br>(-8.52, 13.77)   | 2.67<br>(-4.36, 9.69)    | -2.05<br>(-10.32, 6.22) | <i>Low CHO<br/>high fat</i> |                       |                             |
| -3.87<br>(-12.24, 4.51) | -3.62<br>(-13.34, 6.10) | -4.21<br>(-15.50, 7.08) | -3.65<br>(-12.15, 4.85) | -0.44<br>(-3.72, 2.83)   | -0.40<br>(-11.33, 10.53) | -5.12<br>(-13.79, 3.54) | -3.07<br>(-14.07, 7.93)     | <i>High GI/GL</i>     |                             |
| -1.91<br>(-4.41, 0.59)  | -1.67<br>(-7.21, 3.86)  | -2.26<br>(-10.24, 5.72) | -1.70<br>(-4.61, 1.22)  | 1.51<br>(-6.68, 9.69)    | 1.55<br>(-5.91, 9.01)    | -3.17<br>(-6.52, 0.18)  | -1.12<br>(-8.68, 6.44)      | 1.95<br>(-6.04, 9.94) | <i>Western<br/>habitual</i> |

<sup>1</sup>The values correspond to the mean difference (95% CI) in insulin (mU/L) between the column dietary pattern and the row dietary pattern; column minus row.

*Abbreviations:* CHO, carbohydrate; DASH, Dietary Approaches to Stop Hypertension; DG, dietary guidelines; GI/GL, glycemic index/glycemic load

**Supplementary Table S52.** League table of sensitivity analysis excluding studies with intervention duration longer than 52 weeks for HOMA-IR<sup>1</sup>

|                                    |                                       |                        |                                       |                        |                        |                         |
|------------------------------------|---------------------------------------|------------------------|---------------------------------------|------------------------|------------------------|-------------------------|
| <i>Mediterranean</i>               |                                       |                        |                                       |                        |                        |                         |
| 0.16<br>(-0.23, 0.56)              | <i>DG-based</i>                       |                        |                                       |                        |                        |                         |
| -0.14<br>(-1.23, 0.94)             | -0.31<br>(-1.35, 0.74)                | <i>Low GI/GL</i>       |                                       |                        |                        |                         |
| <b>0.72</b><br><b>(0.23, 1.21)</b> | <b>0.55</b><br><b>(0.16, 0.95)</b>    | 0.86<br>(-0.20, 1.92)  | <i>Plant-based</i>                    |                        |                        |                         |
| -0.03<br>(-0.33, 0.27)             | -0.20<br>(-0.52, 0.13)                | 0.11<br>(-0.96, 1.19)  | <b>-0.75</b><br><b>(-1.21, -0.29)</b> | <i>Low fat</i>         |                        |                         |
| -0.10<br>(-1.23, 1.03)             | -0.27<br>(-1.35, 0.82)                | 0.04<br>(-0.48, 0.56)  | -0.82<br>(-1.92, 0.28)                | -0.07<br>(-1.19, 1.05) | <i>High GI/GL</i>      |                         |
| -0.18<br>(-0.56, 0.20)             | <b>-0.35</b><br><b>(-0.59, -0.10)</b> | -0.04<br>(-1.06, 0.98) | <b>-0.90</b><br><b>(-1.21, -0.59)</b> | -0.15<br>(-0.50, 0.20) | -0.08<br>(-1.14, 0.98) | <i>Western habitual</i> |

<sup>1</sup>The values correspond to the mean difference (95% CI) in HOMA-IR between the column dietary pattern and the row dietary pattern; column minus row. Values in bold are effect sizes that are statistically significant at level of 0.05.

*Abbreviations:* DG, dietary guidelines; GI/GL, glycemic index/glycemic load; HOMA-IR, homeostatic model assessment for insulin resistance

**Supplementary Table S53.** League table of sensitivity analysis excluding studies with intervention duration longer than 52 weeks for hsCRP<sup>1</sup>

|                        |                        |                        |                        |                        |                       |                             |                             |
|------------------------|------------------------|------------------------|------------------------|------------------------|-----------------------|-----------------------------|-----------------------------|
| <i>Mediterranean</i>   |                        |                        |                        |                        |                       |                             |                             |
| 0.34<br>(-0.87, 1.55)  | <i>DASH</i>            |                        |                        |                        |                       |                             |                             |
| 0.12<br>(-1.43, 1.67)  | -0.22<br>(-1.93, 1.49) | <i>Paleo</i>           |                        |                        |                       |                             |                             |
| 0.27<br>(-0.42, 0.96)  | -0.07<br>(-1.06, 0.92) | 0.15<br>(-1.24, 1.54)  | <i>DG-based</i>        |                        |                       |                             |                             |
| -0.11<br>(-0.78, 0.56) | -0.45<br>(-1.76, 0.86) | -0.23<br>(-1.86, 1.40) | -0.38<br>(-1.24, 0.48) | <i>Plant-based</i>     |                       |                             |                             |
| -0.48<br>(-1.10, 0.15) | -0.82<br>(-2.08, 0.45) | -0.60<br>(-2.18, 0.99) | -0.75<br>(-1.52, 0.03) | -0.37<br>(-1.26, 0.52) | <i>Low fat</i>        |                             |                             |
| -0.26<br>(-0.97, 0.45) | -0.60<br>(-1.95, 0.74) | -0.38<br>(-2.04, 1.27) | -0.53<br>(-1.43, 0.37) | -0.15<br>(-0.91, 0.60) | 0.21<br>(-0.72, 1.14) | <i>Low CHO<br/>high fat</i> |                             |
| -0.24<br>(-0.67, 0.18) | -0.58<br>(-1.74, 0.57) | -0.36<br>(-1.87, 1.14) | -0.51<br>(-1.10, 0.08) | -0.13<br>(-0.77, 0.50) | 0.23<br>(-0.47, 0.93) | 0.02<br>(-0.66, 0.70)       | <i>Western<br/>habitual</i> |

<sup>1</sup>The values correspond to the mean difference (95% CI) in hsCRP (mg/L) between the column dietary pattern and the row dietary pattern; column minus row. Values in bold are effect sizes that are statistically significant at level of 0.05.

*Abbreviations:* CHO, carbohydrate; DASH, Dietary Approaches to Stop Hypertension; DG, dietary guidelines; hsCRP, high sensitivity C-reactive protein

**Supplementary Table S54.** League table of sensitivity analysis excluding studies with intervention duration longer than 52 weeks for interleukin-6<sup>1</sup>

|                        |                       |                         |
|------------------------|-----------------------|-------------------------|
| <i>Mediterranean</i>   |                       |                         |
| -0.19<br>(-0.71, 0.34) | <i>DG-based</i>       |                         |
| -0.13<br>(-0.59, 0.34) | 0.06<br>(-0.18, 0.30) | <i>Western habitual</i> |

<sup>1</sup>The values correspond to the mean difference (95% CI) in interleukin-6 (pg/mL) between the column dietary pattern and the row dietary pattern; column minus row. Values in bold are effect sizes that are statistically significant at level of 0.05.

*Abbreviations:* DG, dietary guidelines

**Supplementary Table S55.** League table of sensitivity analysis excluding studies with participants' mean age greater than 70 years for LDL-c<sup>1</sup>

|                                       |                                       |                        |                                       |                        |                                       |                                       |                             |                        |                             |
|---------------------------------------|---------------------------------------|------------------------|---------------------------------------|------------------------|---------------------------------------|---------------------------------------|-----------------------------|------------------------|-----------------------------|
| <i>Mediterranean</i>                  |                                       |                        |                                       |                        |                                       |                                       |                             |                        |                             |
| -0.04<br>(-0.28, 0.20)                | <i>DASH</i>                           |                        |                                       |                        |                                       |                                       |                             |                        |                             |
| -0.25<br>(-0.72, 0.22)                | -0.21<br>(-0.71, 0.28)                | <i>Paleo</i>           |                                       |                        |                                       |                                       |                             |                        |                             |
| -0.12<br>(-0.31, 0.07)                | -0.08<br>(-0.32, 0.16)                | 0.13<br>(-0.30, 0.56)  | <i>DG-based</i>                       |                        |                                       |                                       |                             |                        |                             |
| -0.24<br>(-0.86, 0.39)                | -0.20<br>(-0.84, 0.45)                | 0.02<br>(-0.75, 0.78)  | -0.12<br>(-0.75, 0.51)                | <i>Low GI/GL</i>       |                                       |                                       |                             |                        |                             |
| -0.02<br>(-0.22, 0.18)                | 0.02<br>(-0.24, 0.29)                 | 0.24<br>(-0.24, 0.72)  | 0.10<br>(-0.11, 0.31)                 | 0.22<br>(-0.41, 0.85)  | <i>Plant-based</i>                    |                                       |                             |                        |                             |
| -0.04<br>(-0.18, 0.11)                | 0.00<br>(-0.24, 0.25)                 | 0.22<br>(-0.26, 0.69)  | 0.08<br>(-0.12, 0.28)                 | 0.20<br>(-0.43, 0.83)  | -0.02<br>(-0.22, 0.18)                | <i>Low fat</i>                        |                             |                        |                             |
| <b>-0.38</b><br><b>(-0.70, -0.05)</b> | -0.33<br>(-0.70, 0.03)                | -0.12<br>(-0.67, 0.43) | -0.25<br>(-0.59, 0.08)                | -0.14<br>(-0.82, 0.55) | <b>-0.36</b><br><b>(-0.66, -0.05)</b> | <b>-0.34</b><br><b>(-0.67, -0.01)</b> | <i>Low CHO<br/>high fat</i> |                        |                             |
| -0.28<br>(-0.90, 0.33)                | -0.24<br>(-0.88, 0.39)                | -0.03<br>(-0.79, 0.73) | -0.16<br>(-0.78, 0.46)                | -0.04<br>(-0.25, 0.16) | -0.27<br>(-0.89, 0.36)                | -0.25<br>(-0.87, 0.37)                | 0.09<br>(-0.58, 0.76)       | <i>High GI/GL</i>      |                             |
| <b>-0.30</b><br><b>(-0.43, -0.16)</b> | <b>-0.26</b><br><b>(-0.47, -0.04)</b> | -0.04<br>(-0.50, 0.41) | <b>-0.18</b><br><b>(-0.33, -0.02)</b> | -0.06<br>(-0.67, 0.55) | <b>-0.28</b><br><b>(-0.44, -0.12)</b> | <b>-0.26</b><br><b>(-0.41, -0.11)</b> | 0.08<br>(-0.22, 0.38)       | -0.01<br>(-0.61, 0.59) | <i>Western<br/>habitual</i> |

<sup>1</sup>The values correspond to the mean difference (95% CI) in LDL-c (mmol/L) between the column dietary pattern and the row dietary pattern; column minus row. Values in bold are effect sizes that are statistically significant at level of 0.05.

*Abbreviations:* CHO, carbohydrate; DASH, Dietary Approaches to Stop Hypertension; DG, dietary guidelines; GI/GL, glycemic index/glycemic load



**Supplementary Table S56.** League table of sensitivity analysis excluding studies with participants' mean age greater than 70 years for HDL-c<sup>1</sup>

|                                       |                                       |                        |                                       |                        |                                       |                                       |                                   |                        |                                   |
|---------------------------------------|---------------------------------------|------------------------|---------------------------------------|------------------------|---------------------------------------|---------------------------------------|-----------------------------------|------------------------|-----------------------------------|
| <i>Mediterranean</i>                  |                                       |                        |                                       |                        |                                       |                                       |                                   |                        |                                   |
| <b>0.07</b><br><b>(0.00, 0.13)</b>    | <i>DASH</i>                           |                        |                                       |                        |                                       |                                       |                                   |                        |                                   |
| -0.07<br>(-0.22, 0.07)                | -0.14<br>(-0.29, 0.01)                | <i>Paleo</i>           |                                       |                        |                                       |                                       |                                   |                        |                                   |
| 0.03<br>(-0.02, 0.09)                 | -0.03<br>(-0.10, 0.03)                | 0.11<br>(-0.03, 0.24)  | <i>DG-based</i>                       |                        |                                       |                                       |                                   |                        |                                   |
| 0.02<br>(-0.23, 0.26)                 | -0.05<br>(-0.30, 0.20)                | 0.09<br>(-0.19, 0.37)  | -0.02<br>(-0.26, 0.23)                | <i>Low GI/GL</i>       |                                       |                                       |                                   |                        |                                   |
| <b>0.07</b><br><b>(0.01, 0.12)</b>    | 0.00<br>(-0.07, 0.07)                 | 0.14<br>(-0.01, 0.29)  | 0.03<br>(-0.03, 0.10)                 | 0.05<br>(-0.20, 0.30)  | <i>Plant-based</i>                    |                                       |                                   |                        |                                   |
| 0.05<br>(-0.00, 0.10)                 | -0.02<br>(-0.09, 0.05)                | 0.12<br>(-0.03, 0.27)  | 0.01<br>(-0.04, 0.07)                 | 0.03<br>(-0.22, 0.28)  | -0.02<br>(-0.08, 0.04)                | <i>Low fat</i>                        |                                   |                        |                                   |
| <b>-0.12</b><br><b>(-0.23, -0.02)</b> | <b>-0.19</b><br><b>(-0.30, -0.08)</b> | -0.05<br>(-0.22, 0.12) | <b>-0.16</b><br><b>(-0.26, -0.05)</b> | -0.14<br>(-0.40, 0.12) | <b>-0.19</b><br><b>(-0.29, -0.09)</b> | <b>-0.17</b><br><b>(-0.28, -0.06)</b> | <i>Low CHO</i><br><i>high fat</i> |                        |                                   |
| -0.01<br>(-0.25, 0.24)                | -0.07<br>(-0.32, 0.18)                | 0.07<br>(-0.22, 0.35)  | -0.04<br>(-0.29, 0.21)                | -0.02<br>(-0.08, 0.04) | -0.07<br>(-0.32, 0.17)                | -0.05<br>(-0.30, 0.19)                | 0.12<br>(-0.15, 0.38)             | <i>High GI/GL</i>      |                                   |
| -0.03<br>(-0.07, 0.01)                | <b>-0.10</b><br><b>(-0.15, -0.04)</b> | 0.04<br>(-0.10, 0.19)  | <b>-0.06</b><br><b>(-0.11, -0.02)</b> | -0.05<br>(-0.29, 0.20) | <b>-0.10</b><br><b>(-0.14, -0.05)</b> | <b>-0.08</b><br><b>(-0.12, -0.03)</b> | 0.09<br>(-0.01, 0.19)             | -0.02<br>(-0.27, 0.22) | <i>Western</i><br><i>habitual</i> |

<sup>1</sup>The values correspond to the mean difference (95% CI) in HDL-c (mmol/L) between the column dietary pattern and the row dietary pattern; column minus row. Values in bold are effect sizes that are statistically significant at level of 0.05.

*Abbreviations:* CHO, carbohydrate; DASH, Dietary Approaches to Stop Hypertension; DG, dietary guidelines; GI/GL, glycemic index/glycemic load

**Supplementary Table S57.** League table of sensitivity analysis excluding studies with participants' mean age greater than 70 years for total cholesterol<sup>1</sup>

|                                       |                                       |                        |                                       |                        |                                       |                                       |                             |                        |                             |
|---------------------------------------|---------------------------------------|------------------------|---------------------------------------|------------------------|---------------------------------------|---------------------------------------|-----------------------------|------------------------|-----------------------------|
| <i>Mediterranean</i>                  |                                       |                        |                                       |                        |                                       |                                       |                             |                        |                             |
| 0.05<br>(-0.26, 0.35)                 | <i>DASH</i>                           |                        |                                       |                        |                                       |                                       |                             |                        |                             |
| -0.27<br>(-0.81, 0.28)                | -0.31<br>(-0.89, 0.27)                | <i>Paleo</i>           |                                       |                        |                                       |                                       |                             |                        |                             |
| -0.07<br>(-0.30, 0.16)                | -0.12<br>(-0.41, 0.18)                | 0.20<br>(-0.30, 0.70)  | <i>DG-based</i>                       |                        |                                       |                                       |                             |                        |                             |
| -0.14<br>(-0.95, 0.66)                | -0.19<br>(-1.03, 0.64)                | 0.12<br>(-0.83, 1.07)  | -0.07<br>(-0.89, 0.74)                | <i>Low GI/GL</i>       |                                       |                                       |                             |                        |                             |
| 0.05<br>(-0.20, 0.30)                 | 0.00<br>(-0.33, 0.33)                 | 0.31<br>(-0.25, 0.88)  | 0.12<br>(-0.14, 0.38)                 | 0.19<br>(-0.63, 1.01)  | <i>Plant-based</i>                    |                                       |                             |                        |                             |
| 0.04<br>(-0.15, 0.23)                 | -0.01<br>(-0.32, 0.30)                | 0.30<br>(-0.26, 0.86)  | 0.11<br>(-0.14, 0.35)                 | 0.18<br>(-0.63, 1.00)  | -0.01<br>(-0.27, 0.24)                | <i>Low fat</i>                        |                             |                        |                             |
| <b>-0.43</b><br><b>(-0.84, -0.01)</b> | <b>-0.48</b><br><b>(-0.95, -0.01)</b> | -0.16<br>(-0.82, 0.49) | -0.36<br>(-0.79, 0.07)                | -0.28<br>(-1.17, 0.60) | <b>-0.48</b><br><b>(-0.87, -0.08)</b> | <b>-0.47</b><br><b>(-0.89, -0.04)</b> | <i>Low CHO<br/>high fat</i> |                        |                             |
| -0.28<br>(-1.09, 0.53)                | -0.33<br>(-1.16, 0.51)                | -0.01<br>(-0.97, 0.94) | -0.21<br>(-1.02, 0.60)                | -0.13<br>(-0.44, 0.17) | -0.33<br>(-1.15, 0.49)                | -0.32<br>(-1.13, 0.50)                | 0.15<br>(-0.73, 1.03)       | <i>High GI/GL</i>      |                             |
| <b>-0.31</b><br><b>(-0.48, -0.15)</b> | <b>-0.36</b><br><b>(-0.62, -0.10)</b> | -0.05<br>(-0.58, 0.49) | <b>-0.24</b><br><b>(-0.42, -0.06)</b> | -0.17<br>(-0.96, 0.62) | <b>-0.36</b><br><b>(-0.57, -0.15)</b> | <b>-0.35</b><br><b>(-0.54, -0.16)</b> | 0.12<br>(-0.27, 0.51)       | -0.03<br>(-0.82, 0.76) | <i>Western<br/>habitual</i> |

<sup>1</sup>The values correspond to the mean difference (95% CI) in total cholesterol (mmol/L) between the column dietary pattern and the row dietary pattern; column minus row. Values in bold are effect sizes that are statistically significant at level of 0.05.

*Abbreviations:* CHO, carbohydrate; DASH, Dietary Approaches to Stop Hypertension; DG, dietary guidelines; GI/GL, glycemic index/glycemic load

**Supplementary Table S58.** League table of sensitivity analysis excluding studies with participants' mean age greater than 70 years for triglycerides<sup>1</sup>

|                        |                        |                        |                        |                        |                                    |                        |                                   |                       |                                   |
|------------------------|------------------------|------------------------|------------------------|------------------------|------------------------------------|------------------------|-----------------------------------|-----------------------|-----------------------------------|
| <i>Mediterranean</i>   |                        |                        |                        |                        |                                    |                        |                                   |                       |                                   |
| -0.00<br>(-0.15, 0.14) | <i>DASH</i>            |                        |                        |                        |                                    |                        |                                   |                       |                                   |
| -0.03<br>(-0.23, 0.16) | -0.03<br>(-0.25, 0.19) | <i>Paleo</i>           |                        |                        |                                    |                        |                                   |                       |                                   |
| -0.04<br>(-0.14, 0.05) | -0.04<br>(-0.18, 0.10) | -0.01<br>(-0.18, 0.16) | <i>DG-based</i>        |                        |                                    |                        |                                   |                       |                                   |
| -0.20<br>(-0.70, 0.29) | -0.20<br>(-0.70, 0.31) | -0.17<br>(-0.69, 0.36) | -0.16<br>(-0.65, 0.34) | <i>Low GI/GL</i>       |                                    |                        |                                   |                       |                                   |
| -0.08<br>(-0.19, 0.02) | -0.08<br>(-0.24, 0.07) | -0.05<br>(-0.26, 0.15) | -0.04<br>(-0.15, 0.07) | 0.12<br>(-0.38, 0.62)  | <i>Plant-based</i>                 |                        |                                   |                       |                                   |
| -0.04<br>(-0.13, 0.04) | -0.04<br>(-0.19, 0.11) | -0.01<br>(-0.21, 0.19) | 0.00<br>(-0.10, 0.11)  | 0.16<br>(-0.34, 0.66)  | 0.04<br>(-0.06, 0.15)              | <i>Low fat</i>         |                                   |                       |                                   |
| 0.14<br>(-0.08, 0.35)  | 0.14<br>(-0.11, 0.39)  | 0.17<br>(-0.11, 0.45)  | 0.18<br>(-0.04, 0.40)  | 0.34<br>(-0.20, 0.87)  | <b>0.22</b><br><b>(0.00, 0.44)</b> | 0.18<br>(-0.04, 0.40)  | <i>Low CHO</i><br><i>high fat</i> |                       |                                   |
| -0.25<br>(-0.75, 0.25) | -0.25<br>(-0.75, 0.26) | -0.22<br>(-0.74, 0.31) | -0.20<br>(-0.70, 0.29) | -0.05<br>(-0.15, 0.06) | -0.16<br>(-0.66, 0.33)             | -0.21<br>(-0.71, 0.29) | -0.38<br>(-0.92, 0.15)            | <i>High GI/GL</i>     |                                   |
| -0.03<br>(-0.10, 0.05) | -0.02<br>(-0.15, 0.11) | 0.01<br>(-0.18, 0.20)  | 0.02<br>(-0.06, 0.10)  | 0.18<br>(-0.31, 0.67)  | 0.06<br>(-0.03, 0.15)              | 0.02<br>(-0.07, 0.10)  | -0.16<br>(-0.37, 0.05)            | 0.22<br>(-0.27, 0.71) | <i>Western</i><br><i>habitual</i> |

<sup>1</sup>The values correspond to the mean difference (95% CI) in triglycerides (mmol/L) between the column dietary pattern and the row dietary pattern; column minus row. Values in bold are effect sizes that are statistically significant at level of 0.05.

*Abbreviations:* CHO, carbohydrate; DASH, Dietary Approaches to Stop Hypertension; DG, dietary guidelines; GI/GL, glycemic index/glycemic load

**Supplementary Table S59.** League table of sensitivity analysis excluding studies with participants' mean age greater than 70 years for glucose<sup>1</sup>

|                        |                        |                        |                       |                        |                        |                        |                             |                        |                        |                             |
|------------------------|------------------------|------------------------|-----------------------|------------------------|------------------------|------------------------|-----------------------------|------------------------|------------------------|-----------------------------|
| <i>Mediterranean</i>   |                        |                        |                       |                        |                        |                        |                             |                        |                        |                             |
| 0.03<br>(-0.11, 0.16)  | <i>DASH</i>            |                        |                       |                        |                        |                        |                             |                        |                        |                             |
| -0.06<br>(-0.36, 0.24) | -0.09<br>(-0.40, 0.22) | <i>Paleo</i>           |                       |                        |                        |                        |                             |                        |                        |                             |
| -0.08<br>(-0.17, 0.01) | -0.11<br>(-0.23, 0.01) | -0.02<br>(-0.31, 0.27) | <i>DG-based</i>       |                        |                        |                        |                             |                        |                        |                             |
| 0.01<br>(-0.42, 0.44)  | -0.02<br>(-0.46, 0.42) | 0.07<br>(-0.44, 0.58)  | 0.09<br>(-0.34, 0.52) | <i>Low GI/GL</i>       |                        |                        |                             |                        |                        |                             |
| 0.03<br>(-0.19, 0.25)  | 0.00<br>(-0.24, 0.25)  | 0.09<br>(-0.27, 0.45)  | 0.11<br>(-0.11, 0.33) | 0.02<br>(-0.45, 0.49)  | <i>Plant-based</i>     |                        |                             |                        |                        |                             |
| -0.01<br>(-0.10, 0.08) | -0.03<br>(-0.18, 0.11) | 0.05<br>(-0.25, 0.36)  | 0.07<br>(-0.02, 0.17) | -0.02<br>(-0.45, 0.41) | -0.04<br>(-0.27, 0.19) | <i>Low fat</i>         |                             |                        |                        |                             |
| 0.12<br>(-0.10, 0.34)  | 0.09<br>(-0.15, 0.34)  | 0.18<br>(-0.18, 0.54)  | 0.20<br>(-0.02, 0.42) | 0.11<br>(-0.36, 0.58)  | 0.09<br>(-0.15, 0.34)  | 0.13<br>(-0.10, 0.36)  | <i>Low CHO<br/>high fat</i> |                        |                        |                             |
| 0.02<br>(-0.14, 0.19)  | -0.00<br>(-0.20, 0.19) | 0.08<br>(-0.25, 0.42)  | 0.10<br>(-0.06, 0.27) | 0.02<br>(-0.43, 0.46)  | -0.00<br>(-0.27, 0.26) | 0.03<br>(-0.15, 0.21)  | -0.10<br>(-0.36, 0.16)      | <i>Mexican</i>         |                        |                             |
| 0.08<br>(-0.35, 0.51)  | 0.05<br>(-0.39, 0.49)  | 0.14<br>(-0.37, 0.65)  | 0.16<br>(-0.27, 0.59) | 0.07<br>(-0.04, 0.18)  | 0.05<br>(-0.42, 0.52)  | 0.09<br>(-0.34, 0.52)  | -0.04<br>(-0.51, 0.43)      | 0.06<br>(-0.39, 0.50)  | <i>High GI/GL</i>      |                             |
| -0.06<br>(-0.12, 0.01) | -0.08<br>(-0.21, 0.04) | 0.00<br>(-0.29, 0.30)  | 0.02<br>(-0.04, 0.09) | -0.06<br>(-0.49, 0.36) | -0.08<br>(-0.30, 0.13) | -0.05<br>(-0.14, 0.04) | -0.18<br>(-0.39, 0.03)      | -0.08<br>(-0.23, 0.07) | -0.14<br>(-0.56, 0.29) | <i>Western<br/>habitual</i> |

<sup>1</sup>The values correspond to the mean difference (95% CI) in glucose (mmol/L) between the column dietary pattern and the row dietary pattern; column minus row.

*Abbreviations:* CHO, carbohydrate; DASH, Dietary Approaches to Stop Hypertension; DG, dietary guidelines; GI/GL, glycemic index/glycemic load

**Supplementary Table S60.** League table of sensitivity analysis excluding studies with participants' mean age greater than 70 years for insulin<sup>1</sup>

|                         |                         |                         |                         |                          |                          |                                       |                             |                       |                             |
|-------------------------|-------------------------|-------------------------|-------------------------|--------------------------|--------------------------|---------------------------------------|-----------------------------|-----------------------|-----------------------------|
| <i>Mediterranean</i>    |                         |                         |                         |                          |                          |                                       |                             |                       |                             |
| -0.60<br>(-6.47, 5.26)  | <i>DASH</i>             |                         |                         |                          |                          |                                       |                             |                       |                             |
| 0.64<br>(-5.66, 6.93)   | 1.24<br>(-6.13, 8.61)   | <i>Paleo</i>            |                         |                          |                          |                                       |                             |                       |                             |
| -0.57<br>(-4.23, 3.09)  | 0.03<br>(-5.27, 5.33)   | -1.21<br>(-6.33, 3.91)  | <i>DG-based</i>         |                          |                          |                                       |                             |                       |                             |
| -3.80<br>(-12.16, 4.57) | -3.19<br>(-12.78, 6.40) | -4.43<br>(-14.31, 5.45) | -3.22<br>(-11.67, 5.23) | <i>Low GI/GL</i>         |                          |                                       |                             |                       |                             |
| -3.83<br>(-11.50, 3.84) | -3.23<br>(-12.21, 5.76) | -4.47<br>(-13.77, 4.83) | -3.26<br>(-11.02, 4.50) | -0.04<br>(-10.80, 10.73) | <i>Plant-based</i>       |                                       |                             |                       |                             |
| 1.04<br>(-1.73, 3.81)   | 1.64<br>(-4.46, 7.75)   | 0.40<br>(-6.08, 6.88)   | 1.61<br>(-2.36, 5.58)   | 4.83<br>(-3.74, 13.41)   | 4.87<br>(-3.03, 12.77)   | <i>Low fat</i>                        |                             |                       |                             |
| -1.20<br>(-8.97, 6.57)  | -0.60<br>(-9.67, 8.48)  | -1.84<br>(-11.22, 7.54) | -0.63<br>(-8.49, 7.23)  | 2.59<br>(-8.24, 13.43)   | 2.63<br>(-4.20, 9.46)    | -2.24<br>(-10.24, 5.76)               | <i>Low CHO<br/>high fat</i> |                       |                             |
| -4.23<br>(-12.41, 3.95) | -3.62<br>(-13.05, 5.80) | -4.87<br>(-14.59, 4.86) | -3.66<br>(-11.92, 4.61) | -0.43<br>(-3.60, 2.73)   | -0.40<br>(-11.02, 10.23) | -5.27<br>(-13.66, 3.13)               | -3.03<br>(-13.72, 7.67)     | <i>High GI/GL</i>     |                             |
| -2.29<br>(-4.83, 0.25)  | -1.68<br>(-7.01, 3.64)  | -2.93<br>(-8.77, 2.91)  | -1.72<br>(-4.52, 1.09)  | 1.51<br>(-6.46, 9.48)    | 1.54<br>(-5.70, 8.78)    | <b>-3.33</b><br><b>(-6.49, -0.16)</b> | -1.09<br>(-8.43, 6.26)      | 1.94<br>(-5.84, 9.71) | <i>Western<br/>habitual</i> |

<sup>1</sup>The values correspond to the mean difference (95% CI) in insulin (mU/L) between the column dietary pattern and the row dietary pattern; column minus row. Values in bold are effect sizes that are statistically significant at level of 0.05.

*Abbreviations:* CHO, carbohydrate; DASH, Dietary Approaches to Stop Hypertension; DG, dietary guidelines; GI/GL, glycemic index/glycemic load

**Supplementary Table S61.** League table of sensitivity analysis excluding studies with participants' mean age greater than 70 years for hsCRP<sup>1</sup>

|                        |                        |                        |                        |                        |                       |                         |                         |
|------------------------|------------------------|------------------------|------------------------|------------------------|-----------------------|-------------------------|-------------------------|
| <i>Mediterranean</i>   |                        |                        |                        |                        |                       |                         |                         |
| 0.36<br>(-0.89, 1.61)  | <i>DASH</i>            |                        |                        |                        |                       |                         |                         |
| 0.52<br>(-0.73, 1.78)  | 0.16<br>(-1.29, 1.61)  | <i>Paleo</i>           |                        |                        |                       |                         |                         |
| 0.29<br>(-0.42, 1.01)  | -0.07<br>(-1.10, 0.96) | -0.23<br>(-1.26, 0.80) | <i>DG-based</i>        |                        |                       |                         |                         |
| -0.10<br>(-0.80, 0.60) | -0.47<br>(-1.82, 0.89) | -0.63<br>(-1.98, 0.73) | -0.40<br>(-1.28, 0.49) | <i>Plant-based</i>     |                       |                         |                         |
| -0.46<br>(-1.10, 0.18) | -0.82<br>(-2.12, 0.48) | -0.98<br>(-2.28, 0.32) | -0.75<br>(-1.55, 0.05) | -0.36<br>(-1.27, 0.56) | <i>Low fat</i>        |                         |                         |
| -0.26<br>(-1.00, 0.48) | -0.62<br>(-2.00, 0.76) | -0.78<br>(-2.17, 0.60) | -0.55<br>(-1.48, 0.37) | -0.16<br>(-0.94, 0.63) | 0.20<br>(-0.75, 1.15) | <i>Low CHO high fat</i> |                         |
| -0.23<br>(-0.69, 0.23) | -0.59<br>(-1.78, 0.59) | -0.76<br>(-1.95, 0.44) | -0.52<br>(-1.12, 0.08) | -0.13<br>(-0.79, 0.53) | 0.23<br>(-0.49, 0.95) | 0.03<br>(-0.68, 0.73)   | <i>Western habitual</i> |

<sup>1</sup>The values correspond to the mean difference (95% CI) in hsCRP (mg/L) between the column dietary pattern and the row dietary pattern; column minus row. Values in bold are effect sizes that are statistically significant at level of 0.05.

*Abbreviations:* CHO, carbohydrate; DASH, Dietary Approaches to Stop Hypertension; DG, dietary guidelines; hsCRP, high sensitivity C-reactive protein

**Supplementary Table S62.** League table of sensitivity analysis excluding studies reported hsCRP levels greater than 10 mg/L<sup>1</sup>

|                        |                        |                        |                        |                        |                       |                             |                             |
|------------------------|------------------------|------------------------|------------------------|------------------------|-----------------------|-----------------------------|-----------------------------|
| <i>Mediterranean</i>   |                        |                        |                        |                        |                       |                             |                             |
| 0.24<br>(-0.90, 1.37)  | <i>DASH</i>            |                        |                        |                        |                       |                             |                             |
| 0.39<br>(-0.79, 1.57)  | 0.16<br>(-1.20, 1.51)  | <i>Paleo</i>           |                        |                        |                       |                             |                             |
| 0.17<br>(-0.49, 0.82)  | -0.07<br>(-1.00, 0.86) | -0.23<br>(-1.21, 0.75) | <i>DG-based</i>        |                        |                       |                             |                             |
| -0.10<br>(-0.73, 0.52) | -0.34<br>(-1.57, 0.89) | -0.49<br>(-1.76, 0.77) | -0.27<br>(-1.07, 0.54) | <i>Plant-based</i>     |                       |                             |                             |
| -0.51<br>(-1.11, 0.08) | -0.75<br>(-1.94, 0.45) | -0.91<br>(-2.14, 0.32) | -0.68<br>(-1.43, 0.07) | -0.41<br>(-1.26, 0.43) | <i>Low fat</i>        |                             |                             |
| -0.25<br>(-0.92, 0.42) | -0.49<br>(-1.75, 0.77) | -0.65<br>(-1.95, 0.65) | -0.42<br>(-1.27, 0.43) | -0.15<br>(-0.86, 0.56) | 0.26<br>(-0.62, 1.14) | <i>Low CHO<br/>high fat</i> |                             |
| -0.23<br>(-0.64, 0.17) | -0.47<br>(-1.56, 0.62) | -0.63<br>(-1.76, 0.50) | -0.40<br>(-0.96, 0.16) | -0.13<br>(-0.72, 0.45) | 0.28<br>(-0.39, 0.95) | 0.02<br>(-0.63, 0.66)       | <i>Western<br/>habitual</i> |

<sup>1</sup>The values correspond to the mean difference (95% CI) in hsCRP (mg/L) between the column dietary pattern and the row dietary pattern; column minus row. Values in bold are effect sizes that are statistically significant at level of 0.05.

*Abbreviations:* CHO, carbohydrate; DASH, Dietary Approaches to Stop Hypertension; DG, dietary guidelines; hsCRP, high sensitivity C-reactive protein

**Supplementary Figure S26.** Comparison-adjusted funnel plot for LDL-c

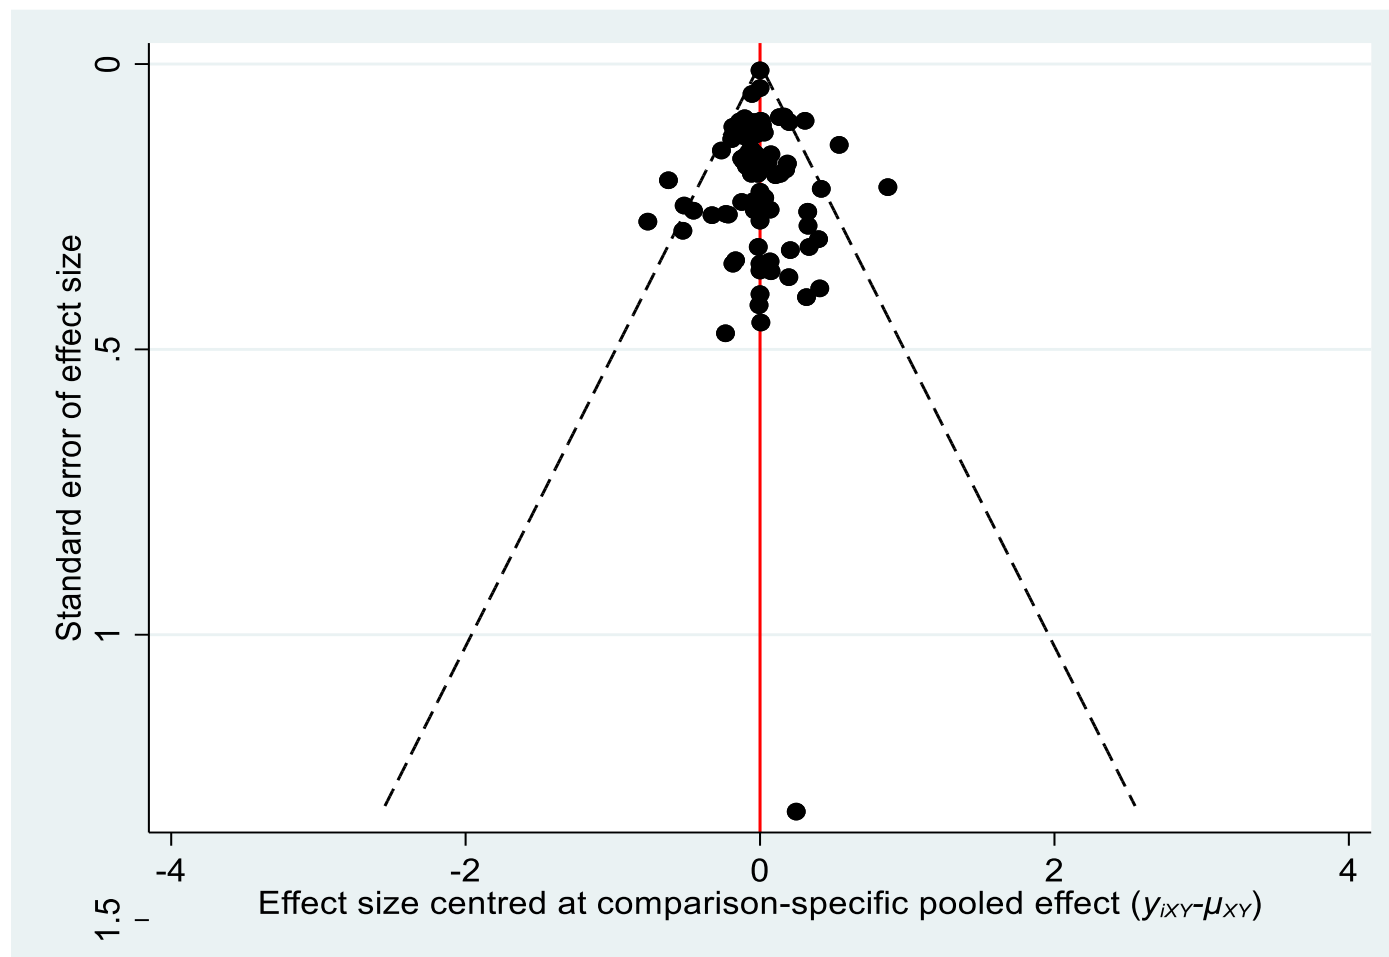

Comparison-adjusted funnel plot showed no asymmetry indicates no evidence of publication bias.



**Supplementary Figure S27.** Comparison-adjusted funnel plot for HDL-c

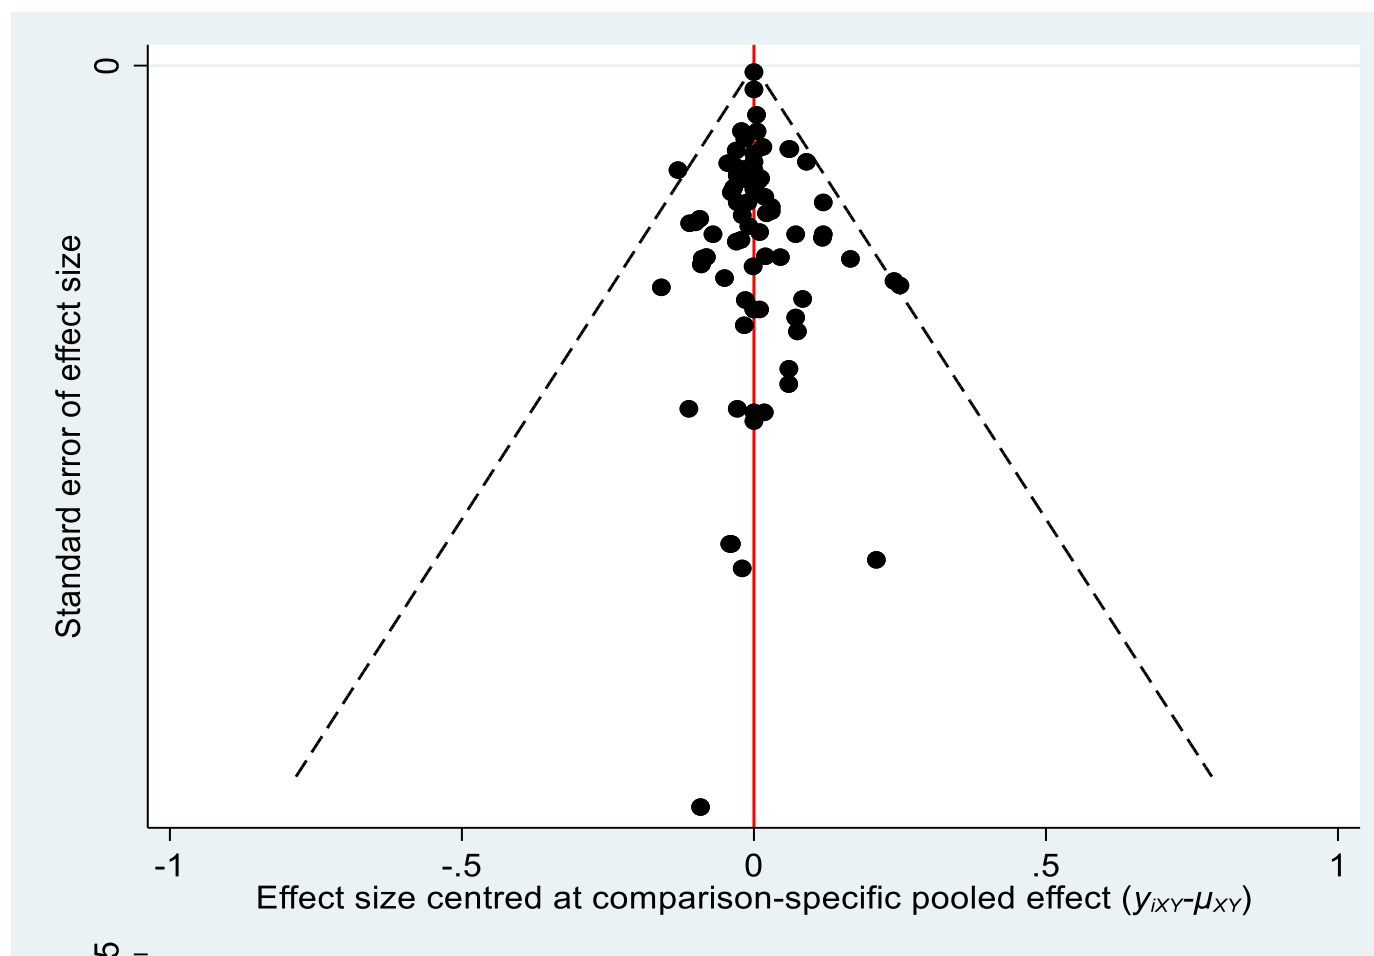

Comparison-adjusted funnel plot showed no asymmetry indicates no evidence of publication bias.

**Supplementary Figure S28.** Comparison-adjusted funnel plot for total cholesterol

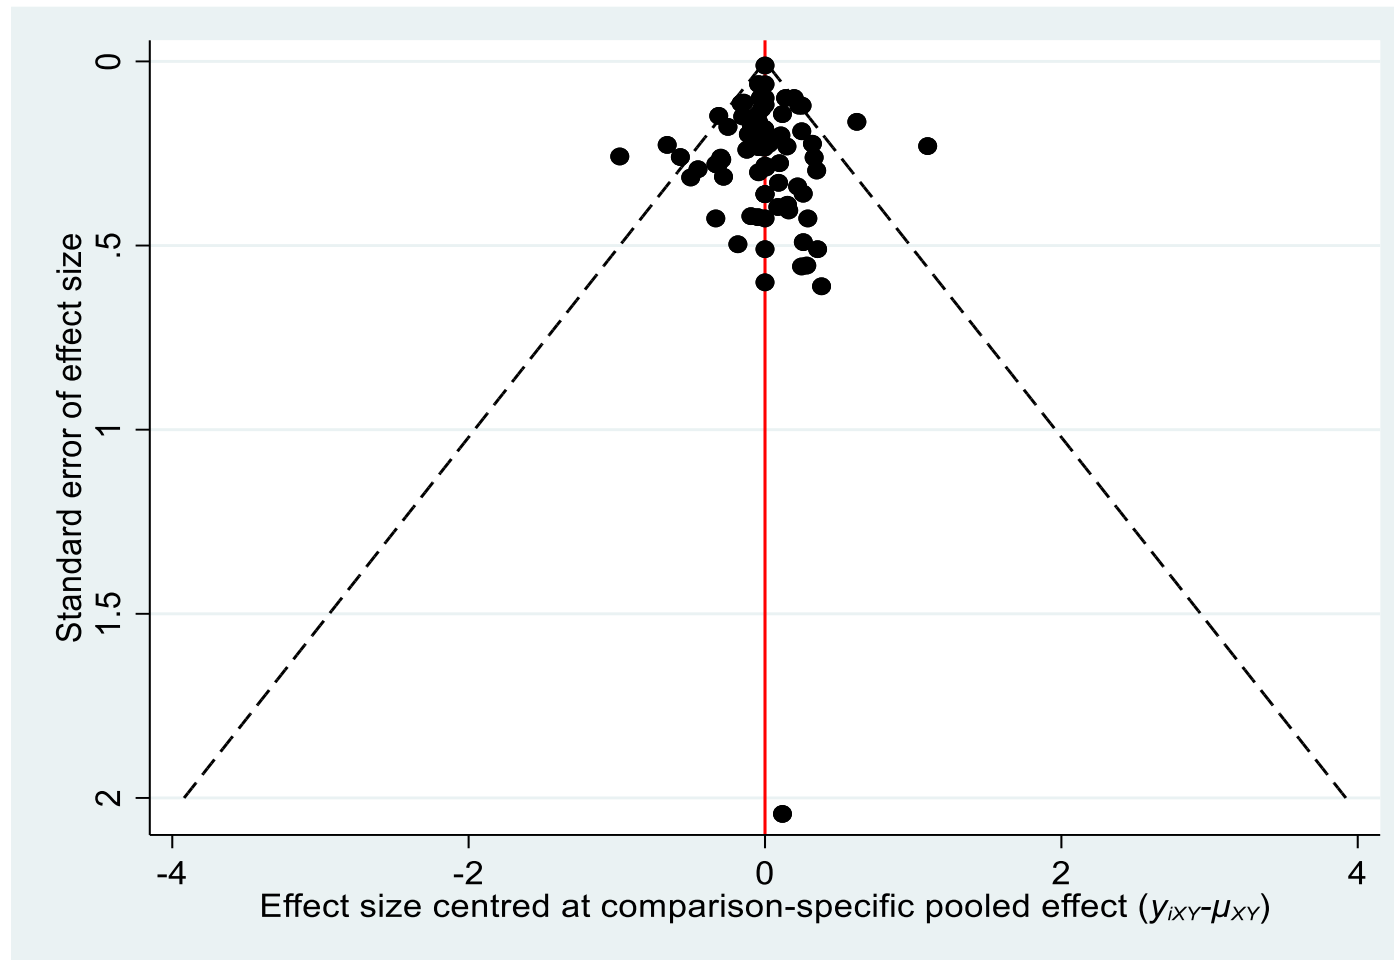

Comparison-adjusted funnel plot showed no asymmetry indicates no evidence of publication bias.

**Supplementary Figure S29.** Comparison-adjusted funnel plot for triglycerides

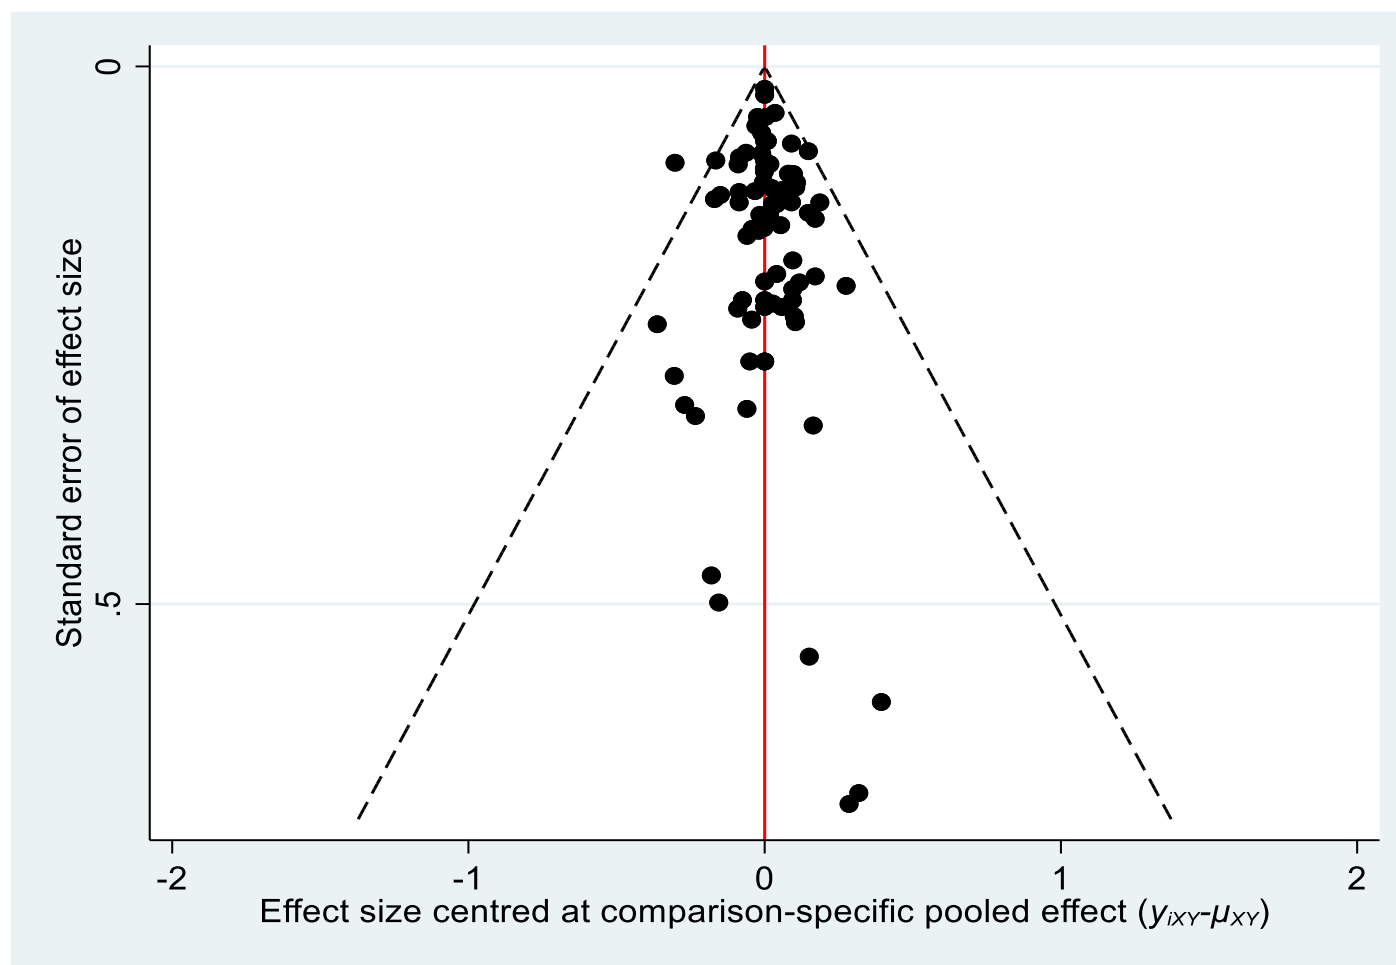

Comparison-adjusted funnel plot showed no asymmetry indicates no evidence of publication bias.

**Supplementary Figure S30.** Comparison-adjusted funnel plot for ApoB

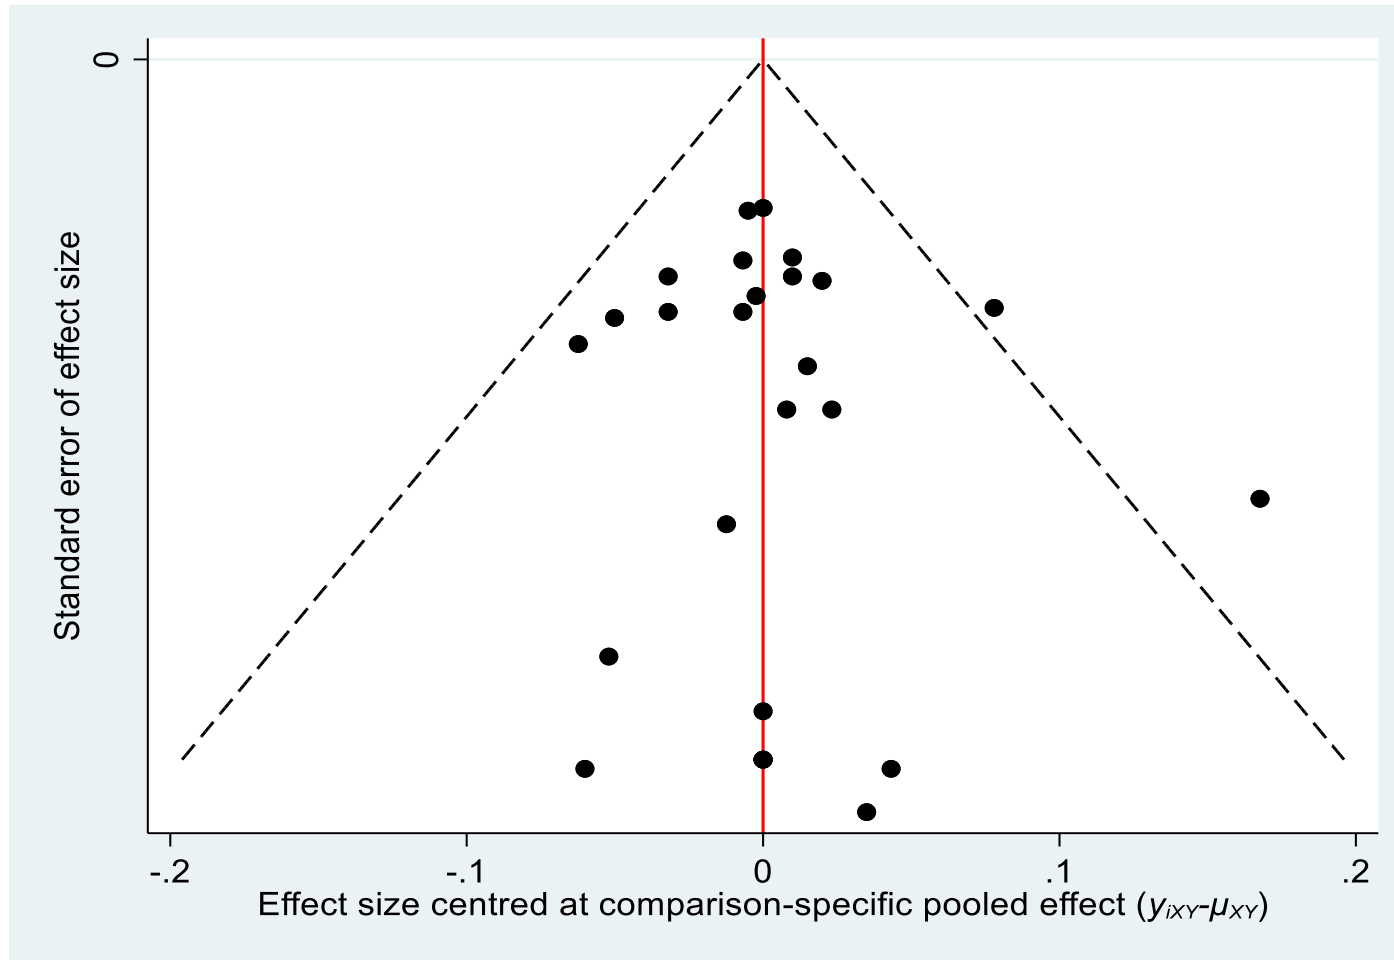

Comparison-adjusted funnel plot showed no asymmetry indicates no evidence of publication bias.

**Supplementary Figure S31.** Comparison-adjusted funnel plot for ApoA1

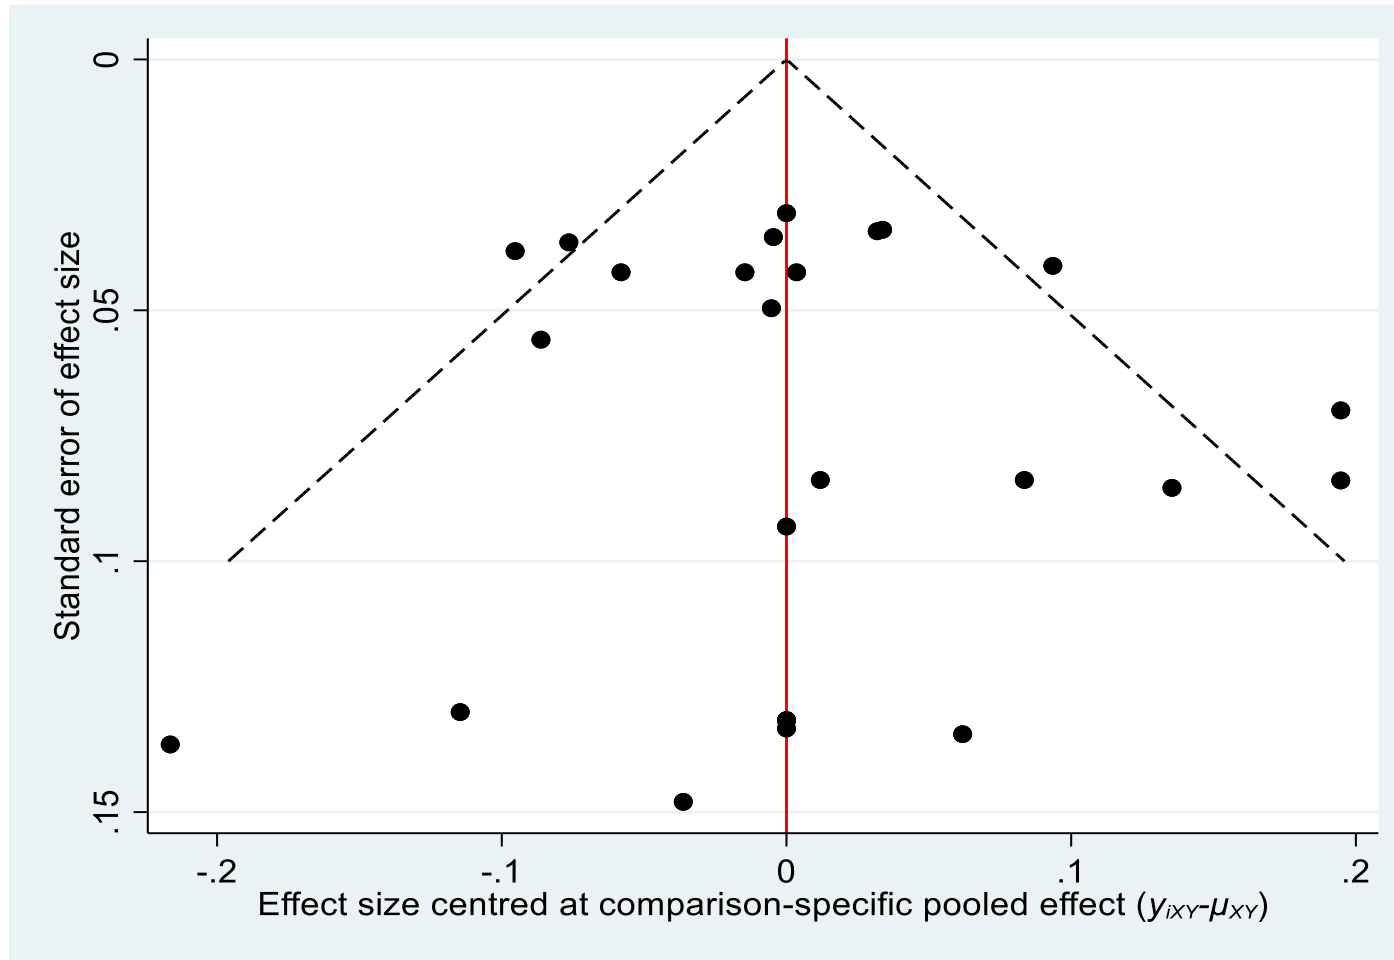

Comparison-adjusted funnel plot showed no asymmetry indicates no evidence of publication bias.

**Supplementary Figure S32.** Comparison-adjusted funnel plot for glucose

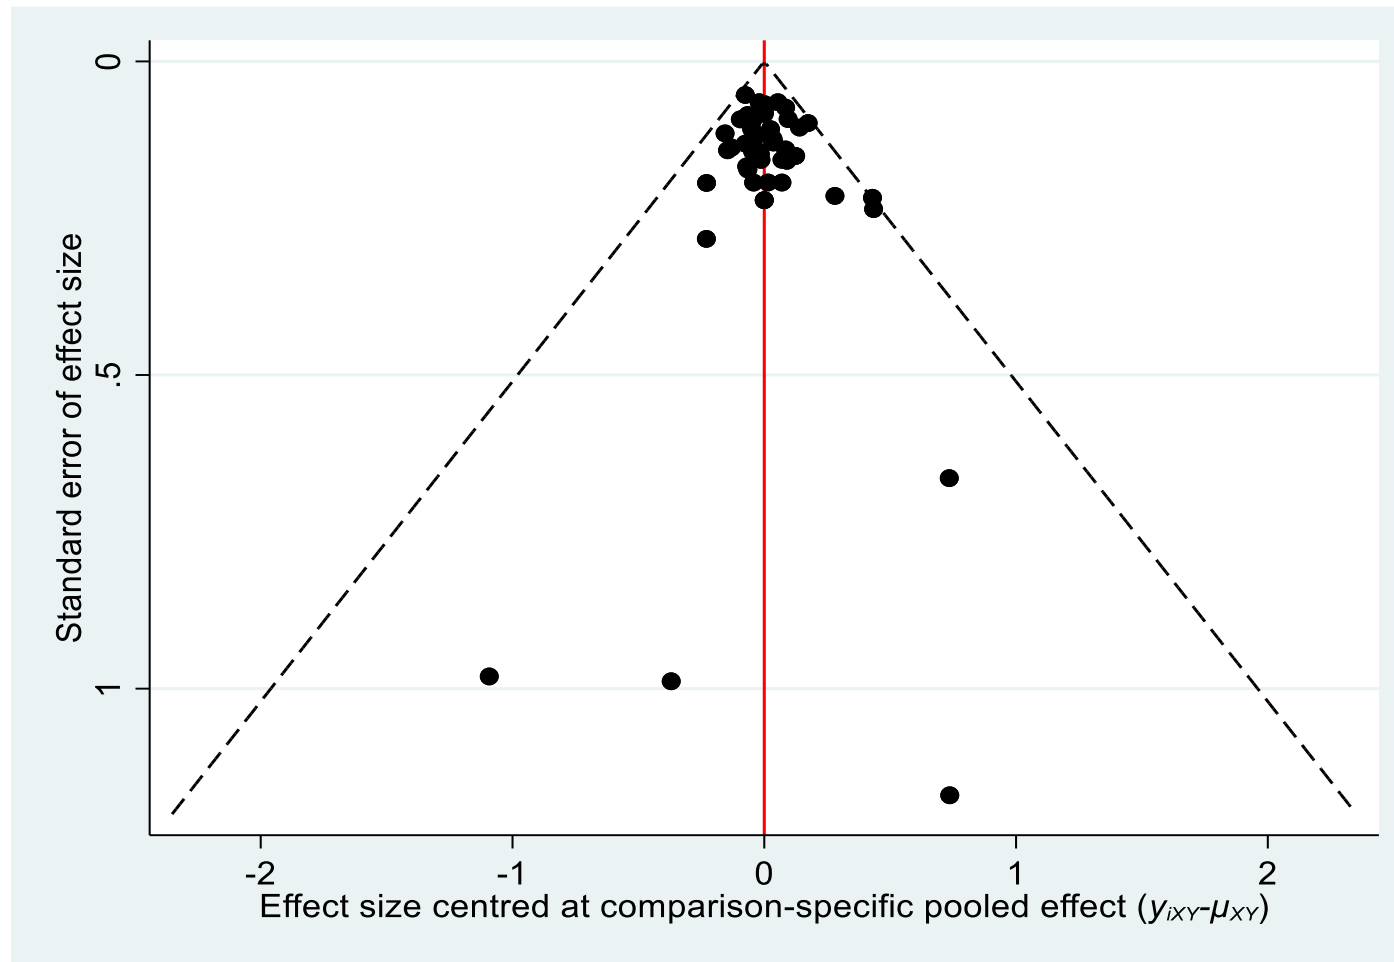

Comparison-adjusted funnel plot showed no asymmetry indicates no evidence of publication bias.

**Supplementary Figure S33.** Comparison-adjusted funnel plot for insulin

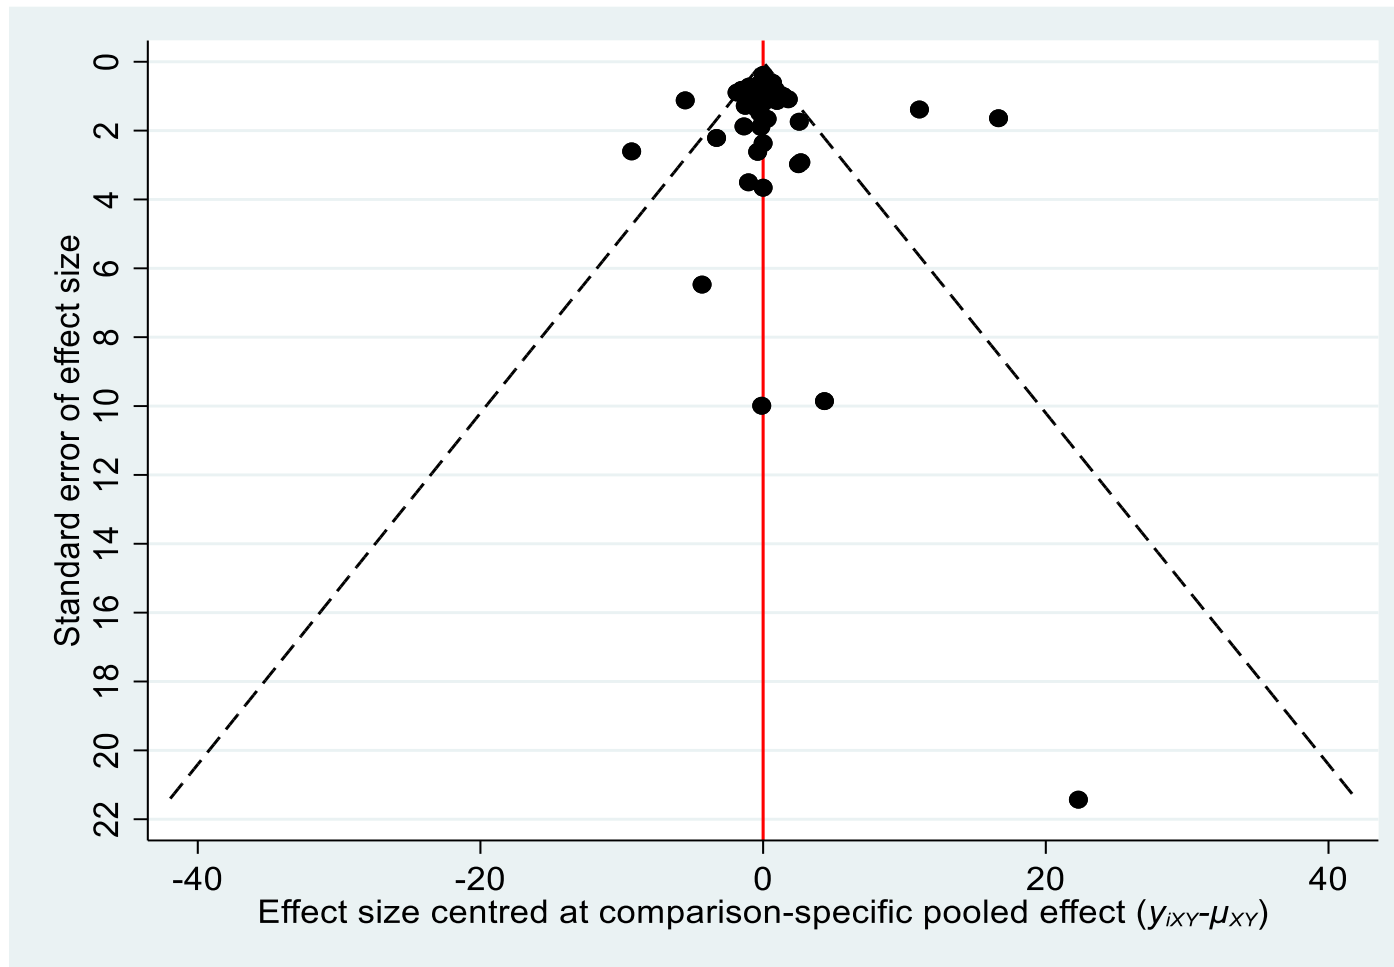

Comparison-adjusted funnel plot showed no asymmetry indicates no evidence of publication bias.

**Supplementary Figure S34.** Comparison-adjusted funnel plot for HOMA-IR

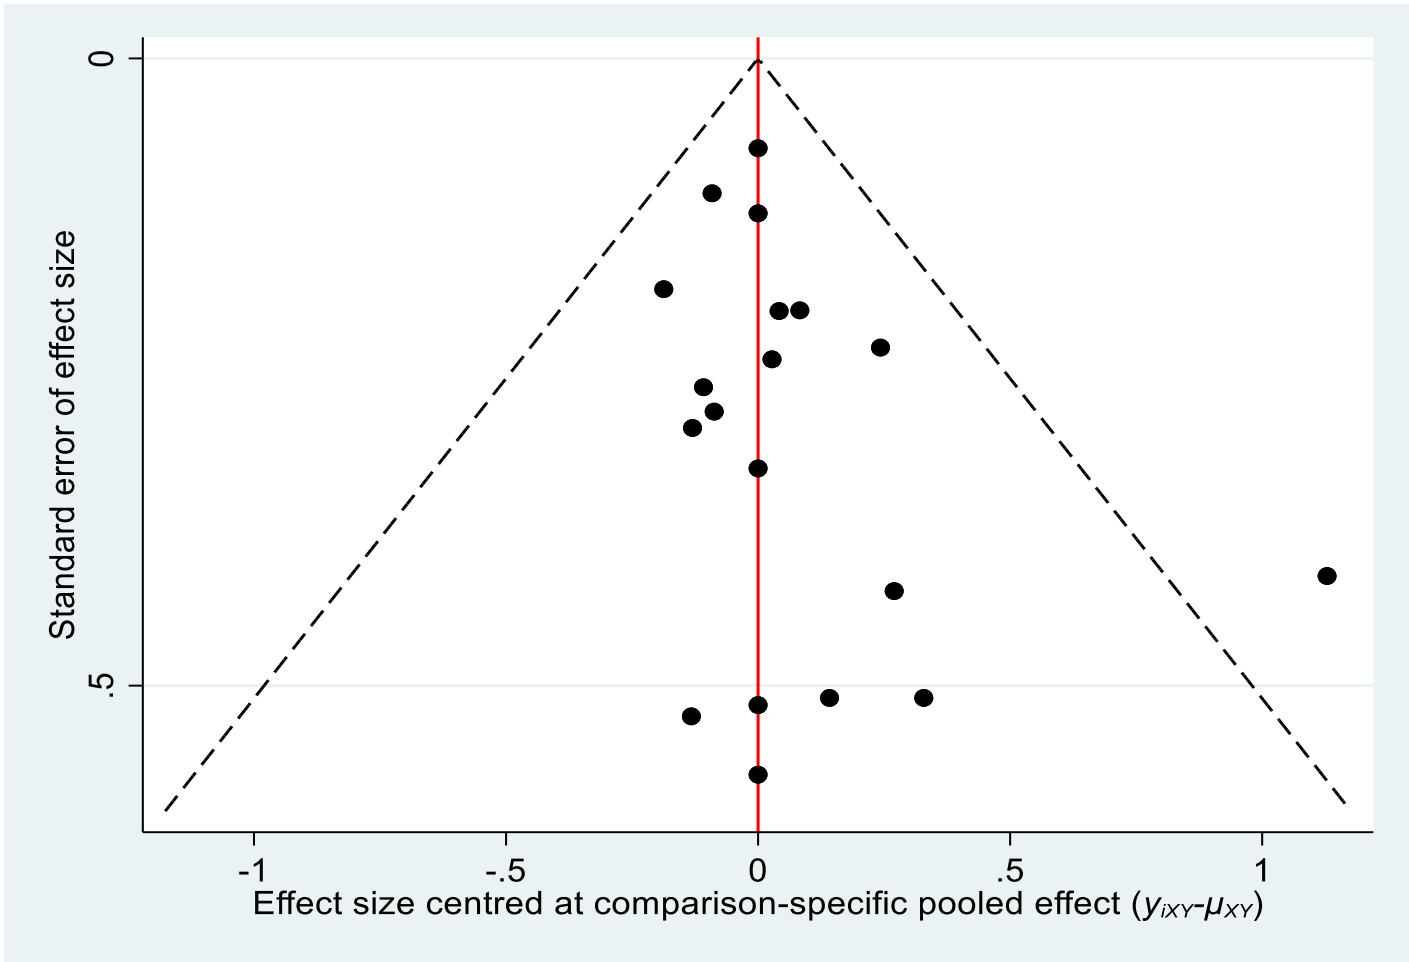

Comparison-adjusted funnel plot showed no asymmetry indicates no evidence of publication bias.



**Supplementary Figure S35.** Comparison-adjusted funnel plot for hsCRP

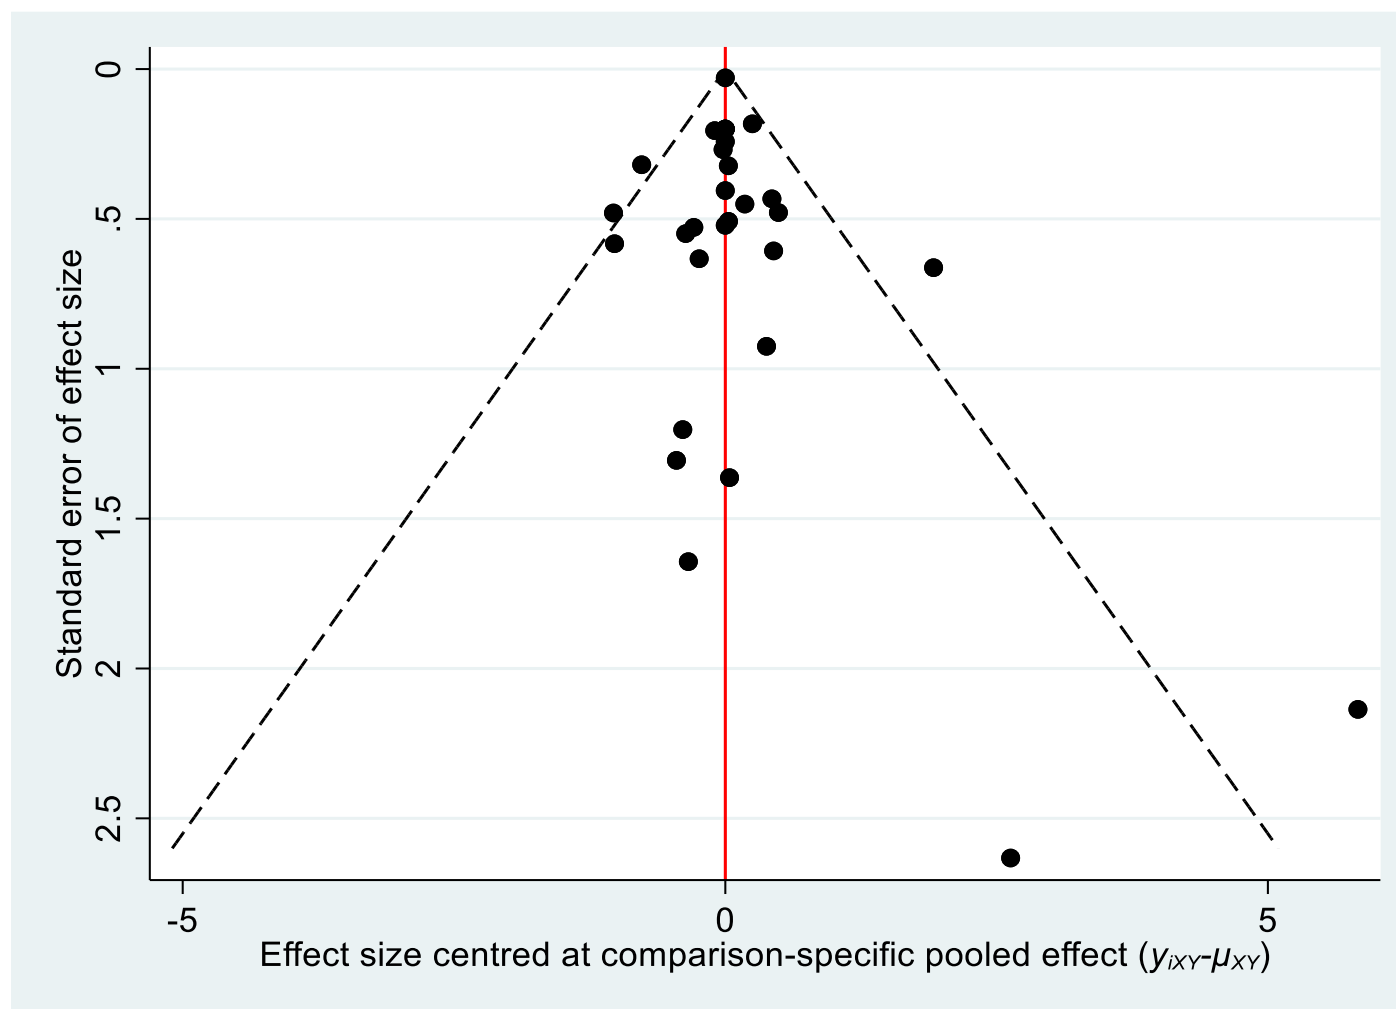

Comparison-adjusted funnel plot showed no asymmetry indicates no evidence of publication bias.

Supplementary Figure S36. Comparison-adjusted funnel plot for interleukin-6

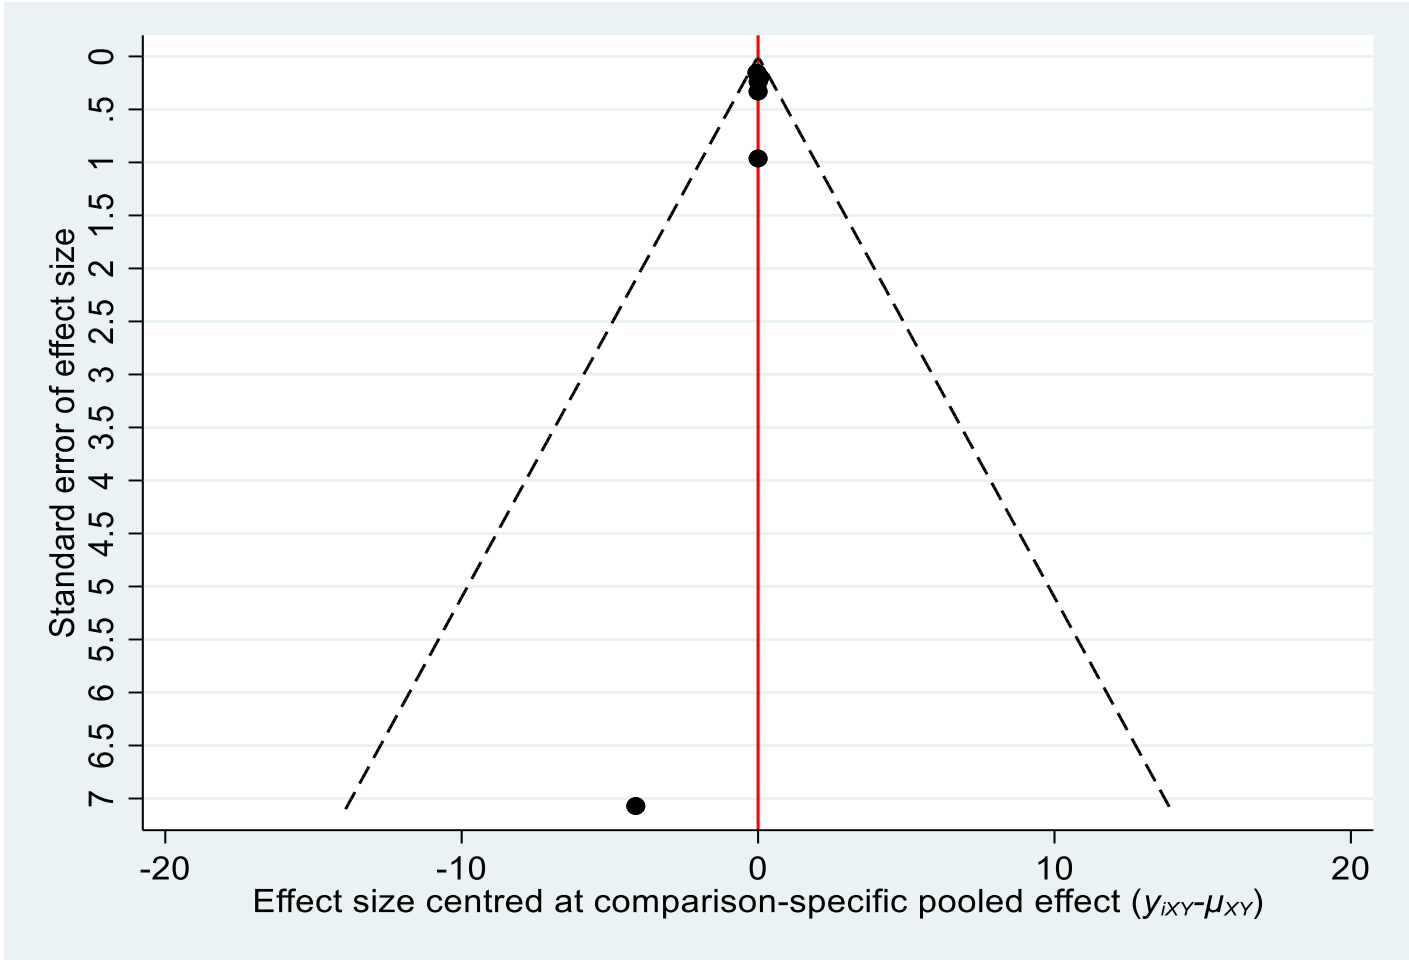

Comparison-adjusted funnel plot showed no asymmetry indicates no evidence of publication bias.

**Supplementary Table S63.** The Confidence in Network Meta-Analysis (CINeMA) framework ratings for credibility for LDL-c

| Comparison | Number of studies | Within-study bias | Reporting bias | Indirectness  | Imprecision    | Heterogeneity  | Incoherence    | Confidence rating | Reason(s) for downgrading       |
|------------|-------------------|-------------------|----------------|---------------|----------------|----------------|----------------|-------------------|---------------------------------|
| A:D        | 1                 | Some concerns     | Low risk       | No concerns   | Some concerns  | Some concerns  | Some concerns  | Moderate          | ["Imprecision"]                 |
| A:F        | 1                 | Some concerns     | Low risk       | No concerns   | Major concerns | No concerns    | No concerns    | Low               | ["Imprecision"]                 |
| A:G        | 10                | Some concerns     | Low risk       | No concerns   | Major concerns | No concerns    | No concerns    | Low               | ["Imprecision"]                 |
| A:H        | 1                 | Some concerns     | Low risk       | No concerns   | No concerns    | Major concerns | No concerns    | Low               | ["Heterogeneity"]               |
| A:K        | 14                | Some concerns     | Low risk       | No concerns   | No concerns    | Some concerns  | Some concerns  | Moderate          | ["Heterogeneity"]               |
| B:D        | 1                 | Some concerns     | Low risk       | Some concerns | Major concerns | No concerns    | No concerns    | Very low          | ["Indirectness", "Imprecision"] |
| B:G        | 1                 | Some concerns     | Low risk       | No concerns   | Major concerns | No concerns    | No concerns    | Low               | ["Imprecision"]                 |
| B:K        | 3                 | Some concerns     | Low risk       | No concerns   | No concerns    | Major concerns | No concerns    | Low               | ["Heterogeneity"]               |
| C:D        | 2                 | No concerns       | Low risk       | No concerns   | Major concerns | No concerns    | No concerns    | Low               | ["Imprecision"]                 |
| D:F        | 1                 | No concerns       | Low risk       | No concerns   | Some concerns  | Some concerns  | No concerns    | Moderate          | ["Imprecision"]                 |
| D:G        | 1                 | Some concerns     | Low risk       | No concerns   | Some concerns  | Some concerns  | No concerns    | Moderate          | ["Imprecision"]                 |
| D:K        | 8                 | Some concerns     | Low risk       | No concerns   | No concerns    | Major concerns | Major concerns | Low               | ["Heterogeneity"]               |
| E:J        | 9                 | No concerns       | Low risk       | Some concerns | Major concerns | No concerns    | No concerns    | Very low          | ["Indirectness", "Imprecision"] |
| E:K        | 1                 | Some concerns     | Low risk       | Some concerns | Major concerns | No concerns    | No concerns    | Very low          | ["Indirectness", "Imprecision"] |
| F:G        | 1                 | Some concerns     | Low risk       | No concerns   | Major concerns | No concerns    | No concerns    | Low               | ["Imprecision"]                 |
| F:H        | 3                 | No concerns       | Low risk       | No concerns   | No concerns    | Major concerns | Major concerns | Low               | ["Heterogeneity"]               |
| F:K        | 8                 | No concerns       | Low risk       | No concerns   | No concerns    | Major concerns | No concerns    | Low               | ["Heterogeneity"]               |

|            |   |               |          |               |                |                |             |          |                                 |
|------------|---|---------------|----------|---------------|----------------|----------------|-------------|----------|---------------------------------|
| <b>G:K</b> | 7 | Some concerns | Low risk | No concerns   | No concerns    | Major concerns | No concerns | Low      | ["Heterogeneity"]               |
| <b>H:K</b> | 3 | No concerns   | Low risk | No concerns   | Major concerns | No concerns    | No concerns | Low      | ["Imprecision"]                 |
| <b>J:K</b> | 1 | Some concerns | Low risk | Some concerns | Major concerns | No concerns    | No concerns | Very low | ["Indirectness", "Imprecision"] |
| <b>A:B</b> | 0 | Some concerns | Low risk | No concerns   | Major concerns | No concerns    | No concerns | Low      | ["Imprecision"]                 |
| <b>A:C</b> | 0 | No concerns   | Low risk | No concerns   | Major concerns | No concerns    | No concerns | Low      | ["Imprecision"]                 |
| <b>A:E</b> | 0 | Some concerns | Low risk | Some concerns | Major concerns | No concerns    | No concerns | Very low | ["Indirectness", "Imprecision"] |
| <b>A:J</b> | 0 | Some concerns | Low risk | Some concerns | Major concerns | No concerns    | No concerns | Very low | ["Indirectness", "Imprecision"] |
| <b>B:C</b> | 0 | No concerns   | Low risk | No concerns   | Major concerns | No concerns    | No concerns | Low      | ["Imprecision"]                 |
| <b>B:E</b> | 0 | Some concerns | Low risk | Some concerns | Major concerns | No concerns    | No concerns | Very low | ["Indirectness", "Imprecision"] |
| <b>B:F</b> | 0 | Some concerns | Low risk | Some concerns | Major concerns | No concerns    | No concerns | Very low | ["Indirectness", "Imprecision"] |
| <b>B:H</b> | 0 | Some concerns | Low risk | No concerns   | Some concerns  | Some concerns  | No concerns | Moderate | ["Imprecision"]                 |
| <b>B:J</b> | 0 | Some concerns | Low risk | Some concerns | Major concerns | No concerns    | No concerns | Very low | ["Indirectness", "Imprecision"] |
| <b>C:E</b> | 0 | Some concerns | Low risk | No concerns   | Major concerns | No concerns    | No concerns | Low      | ["Imprecision"]                 |
| <b>C:F</b> | 0 | No concerns   | Low risk | No concerns   | Major concerns | No concerns    | No concerns | Low      | ["Imprecision"]                 |
| <b>C:G</b> | 0 | No concerns   | Low risk | No concerns   | Major concerns | No concerns    | No concerns | Low      | ["Imprecision"]                 |
| <b>C:H</b> | 0 | No concerns   | Low risk | No concerns   | Major concerns | No concerns    | No concerns | Low      | ["Imprecision"]                 |
| <b>C:J</b> | 0 | Some concerns | Low risk | No concerns   | Major concerns | No concerns    | No concerns | Low      | ["Imprecision"]                 |
| <b>C:K</b> | 0 | No concerns   | Low risk | No concerns   | Major concerns | No concerns    | No concerns | Low      | ["Imprecision"]                 |
| <b>D:E</b> | 0 | Some concerns | Low risk | Some concerns | Major concerns | No concerns    | No concerns | Very low | ["Indirectness", "Imprecision"] |

|            |   |               |          |               |                |                |             |          |                                 |
|------------|---|---------------|----------|---------------|----------------|----------------|-------------|----------|---------------------------------|
| <b>D:H</b> | 0 | No concerns   | Low risk | No concerns   | Some concerns  | Some concerns  | No concerns | Moderate | ["Imprecision"]                 |
| <b>D:J</b> | 0 | Some concerns | Low risk | Some concerns | Major concerns | No concerns    | No concerns | Very low | ["Indirectness", "Imprecision"] |
| <b>E:F</b> | 0 | Some concerns | Low risk | Some concerns | Major concerns | No concerns    | No concerns | Very low | ["Indirectness", "Imprecision"] |
| <b>E:G</b> | 0 | Some concerns | Low risk | Some concerns | Major concerns | No concerns    | No concerns | Very low | ["Indirectness", "Imprecision"] |
| <b>E:H</b> | 0 | Some concerns | Low risk | No concerns   | Major concerns | No concerns    | No concerns | Low      | ["Imprecision"]                 |
| <b>F:J</b> | 0 | Some concerns | Low risk | Some concerns | Major concerns | No concerns    | No concerns | Very low | ["Indirectness", "Imprecision"] |
| <b>G:H</b> | 0 | Some concerns | Low risk | No concerns   | No concerns    | Major concerns | No concerns | Low      | ["Heterogeneity"]               |
| <b>G:J</b> | 0 | Some concerns | Low risk | Some concerns | Major concerns | No concerns    | No concerns | Very low | ["Indirectness", "Imprecision"] |
| <b>H:J</b> | 0 | Some concerns | Low risk | No concerns   | Major concerns | No concerns    | No concerns | Low      | ["Imprecision"]                 |

**A** = Mediterranean diet; **B** = Dietary Approaches to Stop Hypertension; **C** = Paleo diet; **D** = Dietary guidelines-based diets; **E** = low GI / GL diet; **F** = plant-based diets; **G** = low fat diet; **H** = low carbohydrate high fat diet; **I** = traditional Mexican diet; **J** = high GI / GL diet; **K** = western habitual diet

Confidence ratings were moderate (13%), low (53%) and very low (33%).

**Supplementary Table S64.** The Confidence in Network Meta-Analysis (CINeMA) framework ratings for HDL-c

| Comparison | Number of studies | Within-study bias | Reporting bias | Indirectness  | Imprecision    | Heterogeneity | Incoherence    | Confidence rating | Reason(s) for downgrading             |
|------------|-------------------|-------------------|----------------|---------------|----------------|---------------|----------------|-------------------|---------------------------------------|
| A:D        | 1                 | Some concerns     | Low risk       | Some concerns | No concerns    | Some concerns | Some concerns  | Moderate          | ["Indirectness"]                      |
| A:F        | 1                 | Some concerns     | Low risk       | No concerns   | No concerns    | Some concerns | No concerns    | Moderate          | ["Within-study bias"]                 |
| A:G        | 10                | Some concerns     | Low risk       | No concerns   | No concerns    | No concerns   | Some concerns  | Moderate          | ["Within-study bias"]                 |
| A:H        | 1                 | Some concerns     | Low risk       | No concerns   | No concerns    | No concerns   | No concerns    | Moderate          | ["Within-study bias"]                 |
| A:K        | 14                | Some concerns     | Low risk       | No concerns   | No concerns    | No concerns   | No concerns    | Moderate          | ["Within-study bias"]                 |
| B:D        | 1                 | Some concerns     | Low risk       | Some concerns | No concerns    | No concerns   | No concerns    | Moderate          | ["Indirectness"]                      |
| B:G        | 1                 | Some concerns     | Low risk       | Some concerns | No concerns    | No concerns   | No concerns    | Moderate          | ["Indirectness"]                      |
| B:K        | 3                 | Some concerns     | Low risk       | No concerns   | No concerns    | No concerns   | No concerns    | Moderate          | ["Within-study bias"]                 |
| C:D        | 2                 | No concerns       | Low risk       | No concerns   | Some concerns  | No concerns   | Major concerns | Low               | ["Incoherence"]                       |
| D:F        | 1                 | No concerns       | Low risk       | No concerns   | No concerns    | No concerns   | No concerns    | High              | []                                    |
| D:G        | 1                 | Some concerns     | Low risk       | Some concerns | No concerns    | No concerns   | No concerns    | Low               | ["Within-study bias", "Indirectness"] |
| D:K        | 9                 | Some concerns     | Low risk       | No concerns   | No concerns    | No concerns   | Some concerns  | Moderate          | ["Within-study bias"]                 |
| E:J        | 10                | No concerns       | Low risk       | Some concerns | No concerns    | No concerns   | Major concerns | Very low          | ["Indirectness", "Incoherence"]       |
| E:K        | 1                 | Some concerns     | Low risk       | Some concerns | Major concerns | No concerns   | No concerns    | Very low          | ["Indirectness", "Imprecision"]       |
| F:G        | 1                 | No concerns       | Low risk       | Some concerns | No concerns    | No concerns   | Some concerns  | Low               | ["Indirectness", "Incoherence"]       |
| F:H        | 3                 | No concerns       | Low risk       | No concerns   | No concerns    | No concerns   | No concerns    | High              | []                                    |
| F:K        | 8                 | No concerns       | Low risk       | No concerns   | No concerns    | No concerns   | Some concerns  | Moderate          | ["Incoherence"]                       |

|            |   |               |          |               |                |               |                |          |                                 |
|------------|---|---------------|----------|---------------|----------------|---------------|----------------|----------|---------------------------------|
| <b>G:K</b> | 7 | Some concerns | Low risk | No concerns   | No concerns    | No concerns   | No concerns    | Moderate | ["Within-study bias"]           |
| <b>H:K</b> | 3 | No concerns   | Low risk | No concerns   | No concerns    | Some concerns | No concerns    | Moderate | ["Heterogeneity"]               |
| <b>J:K</b> | 1 | Some concerns | Low risk | Some concerns | Major concerns | No concerns   | No concerns    | Very low | ["Indirectness", "Imprecision"] |
| <b>A:B</b> | 0 | Some concerns | Low risk | No concerns   | No concerns    | No concerns   | Major concerns | Low      | ["Incoherence"]                 |
| <b>A:C</b> | 0 | No concerns   | Low risk | No concerns   | Some concerns  | No concerns   | Major concerns | Low      | ["Incoherence"]                 |
| <b>A:E</b> | 0 | Some concerns | Low risk | Some concerns | Major concerns | No concerns   | Major concerns | Very low | ["Indirectness", "Imprecision"] |
| <b>A:J</b> | 0 | Some concerns | Low risk | Some concerns | Major concerns | No concerns   | Major concerns | Very low | ["Indirectness", "Imprecision"] |
| <b>B:C</b> | 0 | Some concerns | Low risk | No concerns   | Some concerns  | No concerns   | Major concerns | Low      | ["Incoherence"]                 |
| <b>B:E</b> | 0 | Some concerns | Low risk | Some concerns | Major concerns | No concerns   | Major concerns | Very low | ["Indirectness", "Imprecision"] |
| <b>B:F</b> | 0 | Some concerns | Low risk | Some concerns | No concerns    | No concerns   | Major concerns | Very low | ["Indirectness", "Incoherence"] |
| <b>B:H</b> | 0 | Some concerns | Low risk | No concerns   | No concerns    | No concerns   | Major concerns | Low      | ["Incoherence"]                 |
| <b>B:J</b> | 0 | Some concerns | Low risk | Some concerns | Major concerns | No concerns   | Major concerns | Very low | ["Indirectness", "Imprecision"] |
| <b>C:E</b> | 0 | Some concerns | Low risk | No concerns   | Major concerns | No concerns   | Major concerns | Low      | ["Imprecision"]                 |
| <b>C:F</b> | 0 | No concerns   | Low risk | No concerns   | Some concerns  | No concerns   | Major concerns | Low      | ["Incoherence"]                 |
| <b>C:G</b> | 0 | No concerns   | Low risk | No concerns   | Some concerns  | No concerns   | Major concerns | Low      | ["Incoherence"]                 |
| <b>C:H</b> | 0 | No concerns   | Low risk | No concerns   | Some concerns  | Some concerns | Major concerns | Low      | ["Incoherence"]                 |
| <b>C:J</b> | 0 | Some concerns | Low risk | No concerns   | Major concerns | No concerns   | Major concerns | Low      | ["Imprecision"]                 |
| <b>C:K</b> | 0 | No concerns   | Low risk | No concerns   | Major concerns | No concerns   | Major concerns | Low      | ["Imprecision"]                 |
| <b>D:E</b> | 0 | Some concerns | Low risk | Some concerns | Major concerns | No concerns   | Major concerns | Very low | ["Indirectness", "Imprecision"] |

|            |   |               |          |               |                |             |                |          |                                 |
|------------|---|---------------|----------|---------------|----------------|-------------|----------------|----------|---------------------------------|
| <b>D:H</b> | 0 | No concerns   | Low risk | No concerns   | No concerns    | No concerns | Major concerns | Low      | ["Incoherence"]                 |
| <b>D:J</b> | 0 | Some concerns | Low risk | Some concerns | Major concerns | No concerns | Major concerns | Very low | ["Indirectness", "Imprecision"] |
| <b>E:F</b> | 0 | Some concerns | Low risk | Some concerns | Major concerns | No concerns | Major concerns | Very low | ["Indirectness", "Imprecision"] |
| <b>E:G</b> | 0 | Some concerns | Low risk | Some concerns | Major concerns | No concerns | Major concerns | Very low | ["Indirectness", "Imprecision"] |
| <b>E:H</b> | 0 | Some concerns | Low risk | Some concerns | Major concerns | No concerns | Major concerns | Very low | ["Indirectness", "Imprecision"] |
| <b>F:J</b> | 0 | Some concerns | Low risk | Some concerns | Major concerns | No concerns | Major concerns | Very low | ["Indirectness", "Imprecision"] |
| <b>G:H</b> | 0 | No concerns   | Low risk | No concerns   | No concerns    | No concerns | Major concerns | Low      | ["Incoherence"]                 |
| <b>G:J</b> | 0 | Some concerns | Low risk | Some concerns | Major concerns | No concerns | Major concerns | Very low | ["Indirectness", "Imprecision"] |
| <b>H:J</b> | 0 | Some concerns | Low risk | Some concerns | Major concerns | No concerns | Major concerns | Very low | ["Indirectness", "Imprecision"] |

**A** = Mediterranean diet; **B** = Dietary Approaches to Stop Hypertension; **C** = Paleo diet; **D** = Dietary guidelines-based diets; **E** = low GI / GL diet; **F** = plant-based diets; **G** = low fat diet; **H** = low carbohydrate high fat diet; **I** = traditional Mexican diet; **J** = high GI / GL diet; **K** = western habitual diet

Confidence ratings were high (4%), moderate (27%), low (33%) and very low (36%).



**Supplementary Table S65.** The Confidence in Network Meta-Analysis (CINeMA) framework ratings for total cholesterol

| Comparison | Number of studies | Within-study bias | Reporting bias | Indirectness  | Imprecision    | Heterogeneity  | Incoherence    | Confidence rating | Reason(s) for downgrading       |
|------------|-------------------|-------------------|----------------|---------------|----------------|----------------|----------------|-------------------|---------------------------------|
| A:D        | 1                 | Some concerns     | Low risk       | No concerns   | Major concerns | No concerns    | Some concerns  | Low               | ["Imprecision"]                 |
| A:F        | 1                 | Some concerns     | Low risk       | No concerns   | Major concerns | No concerns    | No concerns    | Low               | ["Imprecision"]                 |
| A:G        | 10                | Some concerns     | Low risk       | No concerns   | Major concerns | No concerns    | No concerns    | Low               | ["Imprecision"]                 |
| A:H        | 1                 | Some concerns     | Low risk       | No concerns   | No concerns    | Major concerns | No concerns    | Low               | ["Heterogeneity"]               |
| A:K        | 14                | Some concerns     | Low risk       | No concerns   | No concerns    | Major concerns | Some concerns  | Low               | ["Heterogeneity"]               |
| B:D        | 1                 | Some concerns     | Low risk       | Some concerns | Major concerns | No concerns    | No concerns    | Very low          | ["Indirectness", "Imprecision"] |
| B:G        | 1                 | Some concerns     | Low risk       | No concerns   | Major concerns | No concerns    | No concerns    | Low               | ["Imprecision"]                 |
| B:K        | 3                 | Some concerns     | Low risk       | No concerns   | No concerns    | Major concerns | No concerns    | Low               | ["Heterogeneity"]               |
| C:D        | 2                 | No concerns       | Low risk       | No concerns   | Major concerns | No concerns    | No concerns    | Low               | ["Imprecision"]                 |
| D:F        | 1                 | No concerns       | Low risk       | No concerns   | Major concerns | No concerns    | No concerns    | Low               | ["Imprecision"]                 |
| D:G        | 1                 | Some concerns     | Low risk       | No concerns   | Major concerns | No concerns    | No concerns    | Low               | ["Imprecision"]                 |
| D:K        | 9                 | No concerns       | Low risk       | No concerns   | No concerns    | Major concerns | Major concerns | Low               | ["Heterogeneity"]               |
| E:J        | 8                 | Some concerns     | Low risk       | No concerns   | Major concerns | No concerns    | No concerns    | Low               | ["Imprecision"]                 |
| E:K        | 1                 | Some concerns     | Low risk       | Some concerns | Major concerns | No concerns    | No concerns    | Very low          | ["Indirectness", "Imprecision"] |
| F:G        | 1                 | Some concerns     | Low risk       | No concerns   | Major concerns | No concerns    | No concerns    | Low               | ["Imprecision"]                 |
| F:H        | 3                 | No concerns       | Low risk       | No concerns   | No concerns    | Major concerns | No concerns    | Low               | ["Heterogeneity"]               |
| F:K        | 8                 | No concerns       | Low risk       | No concerns   | No concerns    | Major concerns | No concerns    | Low               | ["Heterogeneity"]               |

|            |   |               |          |               |                |                |             |          |                                 |
|------------|---|---------------|----------|---------------|----------------|----------------|-------------|----------|---------------------------------|
| <b>G:K</b> | 7 | Some concerns | Low risk | No concerns   | No concerns    | Major concerns | No concerns | Low      | ["Heterogeneity"]               |
| <b>H:K</b> | 3 | No concerns   | Low risk | No concerns   | Major concerns | No concerns    | No concerns | Low      | ["Imprecision"]                 |
| <b>J:K</b> | 1 | Some concerns | Low risk | Some concerns | Major concerns | No concerns    | No concerns | Very low | ["Indirectness", "Imprecision"] |
| <b>A:B</b> | 0 | Some concerns | Low risk | No concerns   | Major concerns | No concerns    | No concerns | Low      | ["Imprecision"]                 |
| <b>A:C</b> | 0 | No concerns   | Low risk | No concerns   | Major concerns | No concerns    | No concerns | Low      | ["Imprecision"]                 |
| <b>A:E</b> | 0 | Some concerns | Low risk | Some concerns | Major concerns | No concerns    | No concerns | Very low | ["Indirectness", "Imprecision"] |
| <b>A:J</b> | 0 | Some concerns | Low risk | Some concerns | Major concerns | No concerns    | No concerns | Very low | ["Indirectness", "Imprecision"] |
| <b>B:C</b> | 0 | No concerns   | Low risk | No concerns   | Major concerns | No concerns    | No concerns | Low      | ["Imprecision"]                 |
| <b>B:E</b> | 0 | Some concerns | Low risk | Some concerns | Major concerns | No concerns    | No concerns | Very low | ["Indirectness", "Imprecision"] |
| <b>B:F</b> | 0 | Some concerns | Low risk | Some concerns | Major concerns | No concerns    | No concerns | Very low | ["Indirectness", "Imprecision"] |
| <b>B:H</b> | 0 | Some concerns | Low risk | No concerns   | No concerns    | Major concerns | No concerns | Low      | ["Heterogeneity"]               |
| <b>B:J</b> | 0 | Some concerns | Low risk | Some concerns | Major concerns | No concerns    | No concerns | Very low | ["Indirectness", "Imprecision"] |
| <b>C:E</b> | 0 | Some concerns | Low risk | No concerns   | Major concerns | No concerns    | No concerns | Low      | ["Imprecision"]                 |
| <b>C:F</b> | 0 | No concerns   | Low risk | No concerns   | Major concerns | No concerns    | No concerns | Low      | ["Imprecision"]                 |
| <b>C:G</b> | 0 | No concerns   | Low risk | No concerns   | Major concerns | No concerns    | No concerns | Low      | ["Imprecision"]                 |
| <b>C:H</b> | 0 | No concerns   | Low risk | No concerns   | Major concerns | No concerns    | No concerns | Low      | ["Imprecision"]                 |
| <b>C:J</b> | 0 | Some concerns | Low risk | No concerns   | Major concerns | No concerns    | No concerns | Low      | ["Imprecision"]                 |
| <b>C:K</b> | 0 | No concerns   | Low risk | No concerns   | Major concerns | No concerns    | No concerns | Low      | ["Imprecision"]                 |
| <b>D:E</b> | 0 | Some concerns | Low risk | Some concerns | Major concerns | No concerns    | No concerns | Very low | ["Indirectness", "Imprecision"] |

|            |   |               |          |               |                |                |             |          |                                 |
|------------|---|---------------|----------|---------------|----------------|----------------|-------------|----------|---------------------------------|
| <b>D:H</b> | 0 | No concerns   | Low risk | No concerns   | Some concerns  | Some concerns  | No concerns | Moderate | ["Imprecision"]                 |
| <b>D:J</b> | 0 | Some concerns | Low risk | Some concerns | Major concerns | No concerns    | No concerns | Very low | ["Indirectness", "Imprecision"] |
| <b>E:F</b> | 0 | Some concerns | Low risk | Some concerns | Major concerns | No concerns    | No concerns | Very low | ["Indirectness", "Imprecision"] |
| <b>E:G</b> | 0 | Some concerns | Low risk | Some concerns | Major concerns | No concerns    | No concerns | Very low | ["Indirectness", "Imprecision"] |
| <b>E:H</b> | 0 | Some concerns | Low risk | No concerns   | Major concerns | No concerns    | No concerns | Low      | ["Imprecision"]                 |
| <b>F:J</b> | 0 | Some concerns | Low risk | Some concerns | Major concerns | No concerns    | No concerns | Very low | ["Indirectness", "Imprecision"] |
| <b>G:H</b> | 0 | Some concerns | Low risk | No concerns   | No concerns    | Major concerns | No concerns | Low      | ["Heterogeneity"]               |
| <b>G:J</b> | 0 | Some concerns | Low risk | Some concerns | Major concerns | No concerns    | No concerns | Very low | ["Indirectness", "Imprecision"] |
| <b>H:J</b> | 0 | Some concerns | Low risk | No concerns   | Major concerns | No concerns    | No concerns | Low      | ["Imprecision"]                 |

**A** = Mediterranean diet; **B** = Dietary Approaches to Stop Hypertension; **C** = Paleo diet; **D** = Dietary guidelines-based diets; **E** = low GI / GL diet; **F** = plant-based diets; **G** = low fat diet; **H** = low carbohydrate high fat diet; **I** = traditional Mexican diet; **J** = high GI / GL diet; **K** = western habitual diet

Confidence ratings were moderate (2%), low (67%) and very low (31%).

**Supplementary Table S66.** The Confidence in Network Meta-Analysis (CINeMA) framework ratings for HOMA-IR

| Comparison | Number of studies | Within-study bias | Reporting bias | Indirectness  | Imprecision    | Heterogeneity  | Incoherence | Confidence rating | Reason(s) for downgrading       |
|------------|-------------------|-------------------|----------------|---------------|----------------|----------------|-------------|-------------------|---------------------------------|
| A:G        | 3                 | Some concerns     | Some concerns  | Some concerns | Major concerns | No concerns    | No concerns | Very low          | ["Indirectness", "Imprecision"] |
| A:K        | 3                 | Some concerns     | Some concerns  | No concerns   | Major concerns | No concerns    | No concerns | Low               | ["Imprecision"]                 |
| C:D        | 1                 | No concerns       | Some concerns  | No concerns   | Major concerns | No concerns    | No concerns | Low               | ["Imprecision"]                 |
| D:G        | 1                 | No concerns       | Some concerns  | No concerns   | Major concerns | No concerns    | No concerns | Low               | ["Imprecision"]                 |
| D:K        | 4                 | No concerns       | Some concerns  | No concerns   | No concerns    | Major concerns | No concerns | Low               | ["Heterogeneity"]               |
| E:J        | 2                 | Some concerns     | Some concerns  | No concerns   | Major concerns | No concerns    | No concerns | Low               | ["Imprecision"]                 |
| E:K        | 1                 | Some concerns     | Some concerns  | Some concerns | Major concerns | No concerns    | No concerns | Very low          | ["Indirectness", "Imprecision"] |
| F:K        | 1                 | No concerns       | Some concerns  | No concerns   | No concerns    | No concerns    | No concerns | Moderate          | ["Reporting bias"]              |
| G:K        | 2                 | No concerns       | Some concerns  | No concerns   | Major concerns | No concerns    | No concerns | Low               | ["Imprecision"]                 |
| J:K        | 1                 | Some concerns     | Some concerns  | Some concerns | Major concerns | No concerns    | No concerns | Very low          | ["Indirectness", "Imprecision"] |
| A:C        | 0                 | No concerns       | Some concerns  | No concerns   | Major concerns | No concerns    | No concerns | Low               | ["Imprecision"]                 |
| A:D        | 0                 | Some concerns     | Some concerns  | No concerns   | Major concerns | No concerns    | No concerns | Low               | ["Imprecision"]                 |
| A:E        | 0                 | Some concerns     | Some concerns  | Some concerns | Major concerns | No concerns    | No concerns | Very low          | ["Indirectness", "Imprecision"] |
| A:F        | 0                 | No concerns       | Some concerns  | No concerns   | No concerns    | No concerns    | No concerns | Moderate          | []                              |
| A:J        | 0                 | Some concerns     | Some concerns  | Some concerns | Major concerns | No concerns    | No concerns | Very low          | ["Indirectness", "Imprecision"] |
| C:E        | 0                 | No concerns       | Some concerns  | No concerns   | Major concerns | No concerns    | No concerns | Low               | ["Imprecision"]                 |
| C:F        | 0                 | No concerns       | Some concerns  | No concerns   | Major concerns | No concerns    | No concerns | Low               | ["Imprecision"]                 |

|            |   |               |               |               |                |                |             |          |                                 |
|------------|---|---------------|---------------|---------------|----------------|----------------|-------------|----------|---------------------------------|
| <b>C:G</b> | 0 | No concerns   | Some concerns | No concerns   | No concerns    | Major concerns | No concerns | Low      | ["Heterogeneity"]               |
| <b>C:J</b> | 0 | No concerns   | Some concerns | No concerns   | Major concerns | No concerns    | No concerns | Low      | ["Imprecision"]                 |
| <b>C:K</b> | 0 | No concerns   | Some concerns | No concerns   | No concerns    | No concerns    | No concerns | Moderate | ["Reporting bias"]              |
| <b>D:E</b> | 0 | Some concerns | Some concerns | No concerns   | Major concerns | No concerns    | No concerns | Low      | ["Imprecision"]                 |
| <b>D:F</b> | 0 | No concerns   | Some concerns | No concerns   | No concerns    | Major concerns | No concerns | Low      | ["Heterogeneity"]               |
| <b>D:J</b> | 0 | Some concerns | Some concerns | No concerns   | Major concerns | No concerns    | No concerns | Low      | ["Imprecision"]                 |
| <b>E:F</b> | 0 | Some concerns | Some concerns | No concerns   | Major concerns | No concerns    | No concerns | Low      | ["Imprecision"]                 |
| <b>E:G</b> | 0 | Some concerns | Some concerns | Some concerns | Major concerns | No concerns    | No concerns | Very low | ["Indirectness", "Imprecision"] |
| <b>F:G</b> | 0 | No concerns   | Some concerns | No concerns   | No concerns    | No concerns    | No concerns | Moderate | ["Reporting bias"]              |
| <b>F:J</b> | 0 | Some concerns | Some concerns | No concerns   | Major concerns | No concerns    | No concerns | Low      | ["Imprecision"]                 |
| <b>G:J</b> | 0 | Some concerns | Some concerns | Some concerns | Major concerns | No concerns    | No concerns | Very low | ["Indirectness", "Imprecision"] |

**A** = Mediterranean diet; **B** = Dietary Approaches to Stop Hypertension; **C** = Paleo diet; **D** = Dietary guidelines-based diets; **E** = low GI / GL diet; **F** = plant-based diets; **G** = low fat diet; **H** = low carbohydrate high fat diet; **I** = traditional Mexican diet; **J** = high GI / GL diet; **K** = western habitual diet

Confidence ratings were moderate (14%), low (61%) and very low (25%).

**Supplementary Table S67.** The Confidence in Network Meta-Analysis (CINeMA) framework ratings for hsCRP

| Comparison | Number of studies | Within-study bias | Reporting bias | Indirectness  | Imprecision    | Heterogeneity | Incoherence | Confidence rating | Reason(s) for downgrading       |
|------------|-------------------|-------------------|----------------|---------------|----------------|---------------|-------------|-------------------|---------------------------------|
| A:F        | 1                 | Some concerns     | Some concerns  | No concerns   | Major concerns | No concerns   | No concerns | Low               | ["Imprecision"]                 |
| A:G        | 3                 | Some concerns     | Some concerns  | Some concerns | Some concerns  | Some concerns | No concerns | Low               | ["Indirectness", "Imprecision"] |
| A:H        | 1                 | Some concerns     | Some concerns  | No concerns   | Some concerns  | Some concerns | No concerns | Moderate          | ["Imprecision"]                 |
| A:K        | 6                 | Some concerns     | Some concerns  | No concerns   | Some concerns  | Some concerns | No concerns | Moderate          | ["Imprecision"]                 |
| B:D        | 1                 | Some concerns     | Some concerns  | Some concerns | Major concerns | No concerns   | No concerns | Very low          | ["Indirectness", "Imprecision"] |
| C:D        | 2                 | No concerns       | Some concerns  | No concerns   | Major concerns | No concerns   | No concerns | Low               | ["Imprecision"]                 |
| D:G        | 1                 | No concerns       | Some concerns  | No concerns   | No concerns    | Some concerns | No concerns | Moderate          | ["Heterogeneity"]               |
| D:K        | 8                 | No concerns       | Some concerns  | No concerns   | Some concerns  | Some concerns | No concerns | Moderate          | ["Imprecision"]                 |
| F:H        | 2                 | Some concerns     | Some concerns  | No concerns   | Major concerns | No concerns   | No concerns | Low               | ["Imprecision"]                 |
| F:K        | 2                 | Some concerns     | Some concerns  | No concerns   | Some concerns  | Some concerns | No concerns | Moderate          | ["Imprecision"]                 |
| G:K        | 1                 | Some concerns     | Some concerns  | No concerns   | Some concerns  | Some concerns | No concerns | Moderate          | ["Imprecision"]                 |
| H:K        | 2                 | Some concerns     | Some concerns  | No concerns   | Major concerns | No concerns   | No concerns | Low               | ["Imprecision"]                 |
| A:B        | 0                 | Some concerns     | Some concerns  | Some concerns | Major concerns | No concerns   | No concerns | Very low          | ["Indirectness", "Imprecision"] |
| A:C        | 0                 | No concerns       | Some concerns  | No concerns   | Major concerns | No concerns   | No concerns | Low               | ["Imprecision"]                 |
| A:D        | 0                 | Some concerns     | Some concerns  | No concerns   | Some concerns  | Some concerns | No concerns | Moderate          | ["Imprecision"]                 |
| B:C        | 0                 | Some concerns     | Some concerns  | Some concerns | Major concerns | No concerns   | No concerns | Very low          | ["Indirectness", "Imprecision"] |
| B:F        | 0                 | Some concerns     | Some concerns  | No concerns   | Major concerns | No concerns   | No concerns | Low               | ["Imprecision"]                 |

|            |   |               |               |               |                |               |             |          |                                 |
|------------|---|---------------|---------------|---------------|----------------|---------------|-------------|----------|---------------------------------|
| <b>B:G</b> | 0 | Some concerns | Some concerns | Some concerns | Some concerns  | Some concerns | No concerns | Low      | ["Indirectness", "Imprecision"] |
| <b>B:H</b> | 0 | Some concerns | Some concerns | No concerns   | Major concerns | No concerns   | No concerns | Low      | ["Imprecision"]                 |
| <b>B:K</b> | 0 | Some concerns | Some concerns | Some concerns | Major concerns | No concerns   | No concerns | Very low | ["Indirectness", "Imprecision"] |
| <b>C:F</b> | 0 | Some concerns | Some concerns | No concerns   | Major concerns | No concerns   | No concerns | Low      | ["Imprecision"]                 |
| <b>C:G</b> | 0 | No concerns   | Some concerns | No concerns   | Some concerns  | Some concerns | No concerns | Moderate | ["Imprecision"]                 |
| <b>C:H</b> | 0 | Some concerns | Some concerns | No concerns   | Major concerns | No concerns   | No concerns | Low      | ["Imprecision"]                 |
| <b>C:K</b> | 0 | No concerns   | Some concerns | No concerns   | Some concerns  | Some concerns | No concerns | Moderate | ["Imprecision"]                 |
| <b>D:F</b> | 0 | Some concerns | Some concerns | No concerns   | Some concerns  | Some concerns | No concerns | Moderate | ["Imprecision"]                 |
| <b>D:H</b> | 0 | Some concerns | Some concerns | No concerns   | Some concerns  | Some concerns | No concerns | Moderate | ["Imprecision"]                 |
| <b>F:G</b> | 0 | Some concerns | Some concerns | No concerns   | Some concerns  | Some concerns | No concerns | Moderate | ["Imprecision"]                 |
| <b>G:H</b> | 0 | Some concerns | Some concerns | No concerns   | Major concerns | No concerns   | No concerns | Low      | ["Imprecision"]                 |

**A** = Mediterranean diet; **B** = Dietary Approaches to Stop Hypertension; **C** = Paleo diet; **D** = Dietary guidelines-based diets; **E** = low GI / GL diet; **F** = plant-based diets; **G** = low fat diet; **H** = low carbohydrate high fat diet; **I** = traditional Mexican diet; **J** = high GI / GL diet; **K** = western habitual diet

Confidence ratings were moderate (43%), low (43%) and very low (14%).

**Supplementary Figure S37.** Right-angle Mixture Triangles (RMTs) for total cholesterol<sup>1</sup>

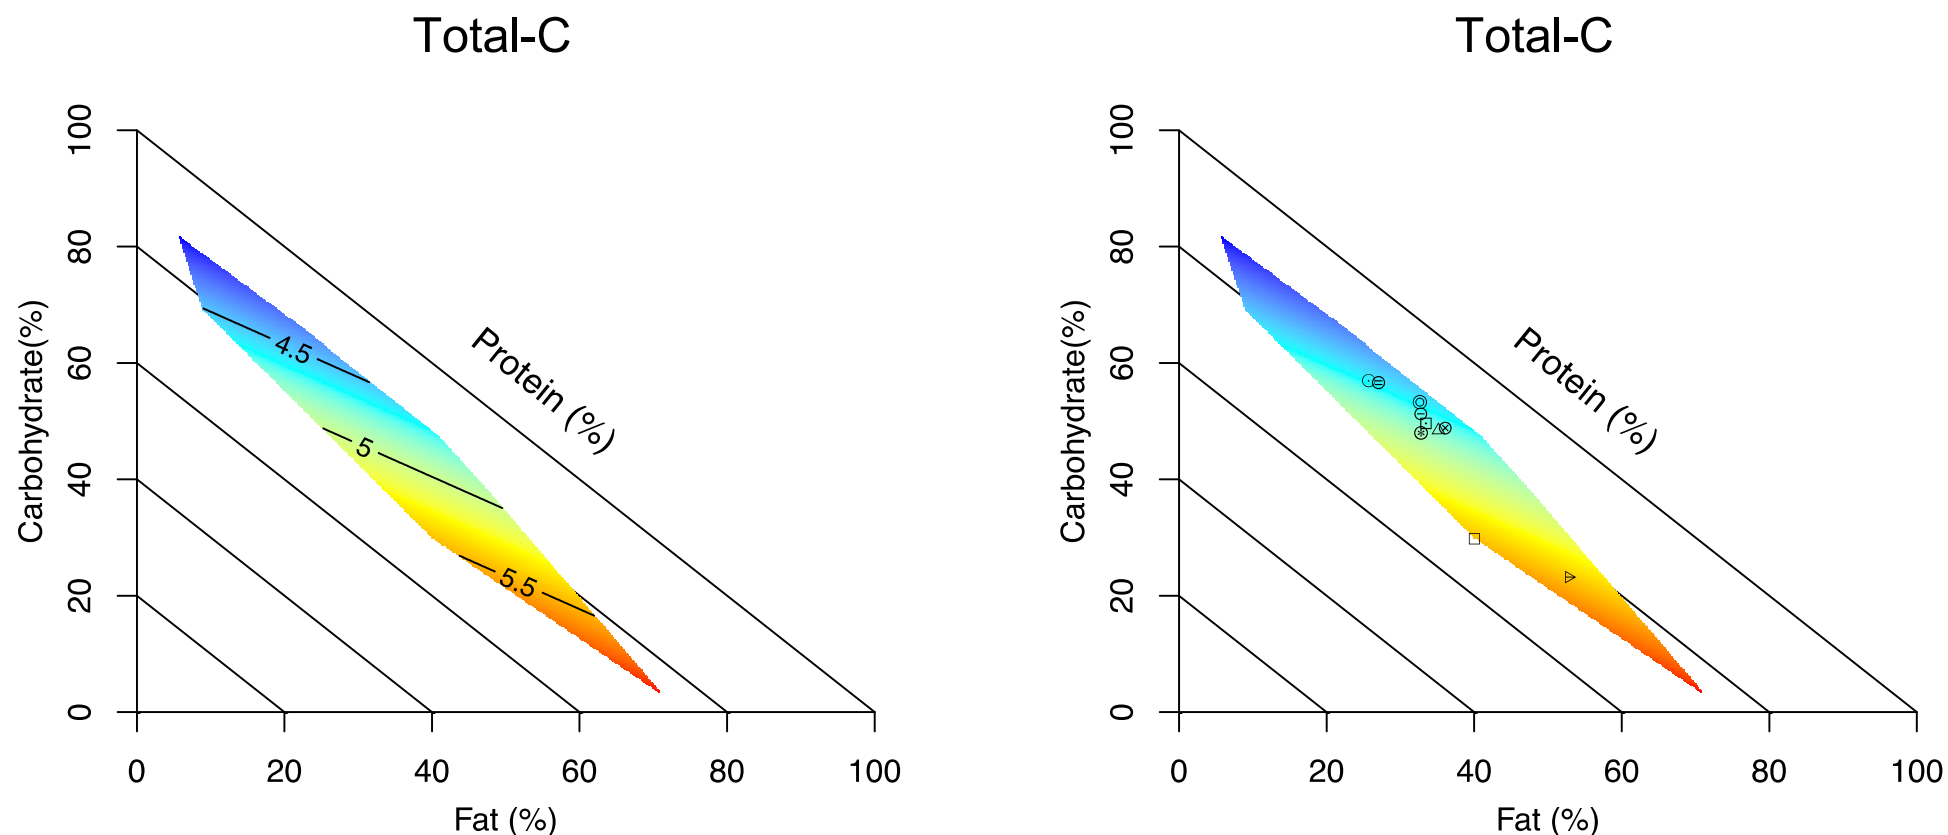

Δ = Mediterranean diet; ⊙ = Dietary Approaches to Stop Hypertension; □ = Paleo diet; ◻ = Dietary guidelines-based diets; ⊖ = low GI / GL diet; ⊕ = plant-based diets; ⊗ = low fat diet; ▷ = low carbohydrate high fat diet; ⊕ = high GI / GL diet; ⊗ = western habitual diet

The symbols on the response surfaces correspond to the average macronutrient composition of each dietary pattern.

<sup>1</sup>Response surfaces with contour lines show the predicted effects superimposed onto a composition triangle for total cholesterol (mmol/L). Each space on these RMTs represents 100% of dietary energy, being the sum of the x-axis (fat), the y-axis (carbohydrate), and an inferred z-axis (protein). A diagonal line closer to the origin corresponds to higher protein (%) intake. The distribution of the surface limited to the intakes observed in the included dietary studies.



**Supplementary Figure S38.** Right-angle Mixture Triangles (RMTs) for HDL-c<sup>1</sup>

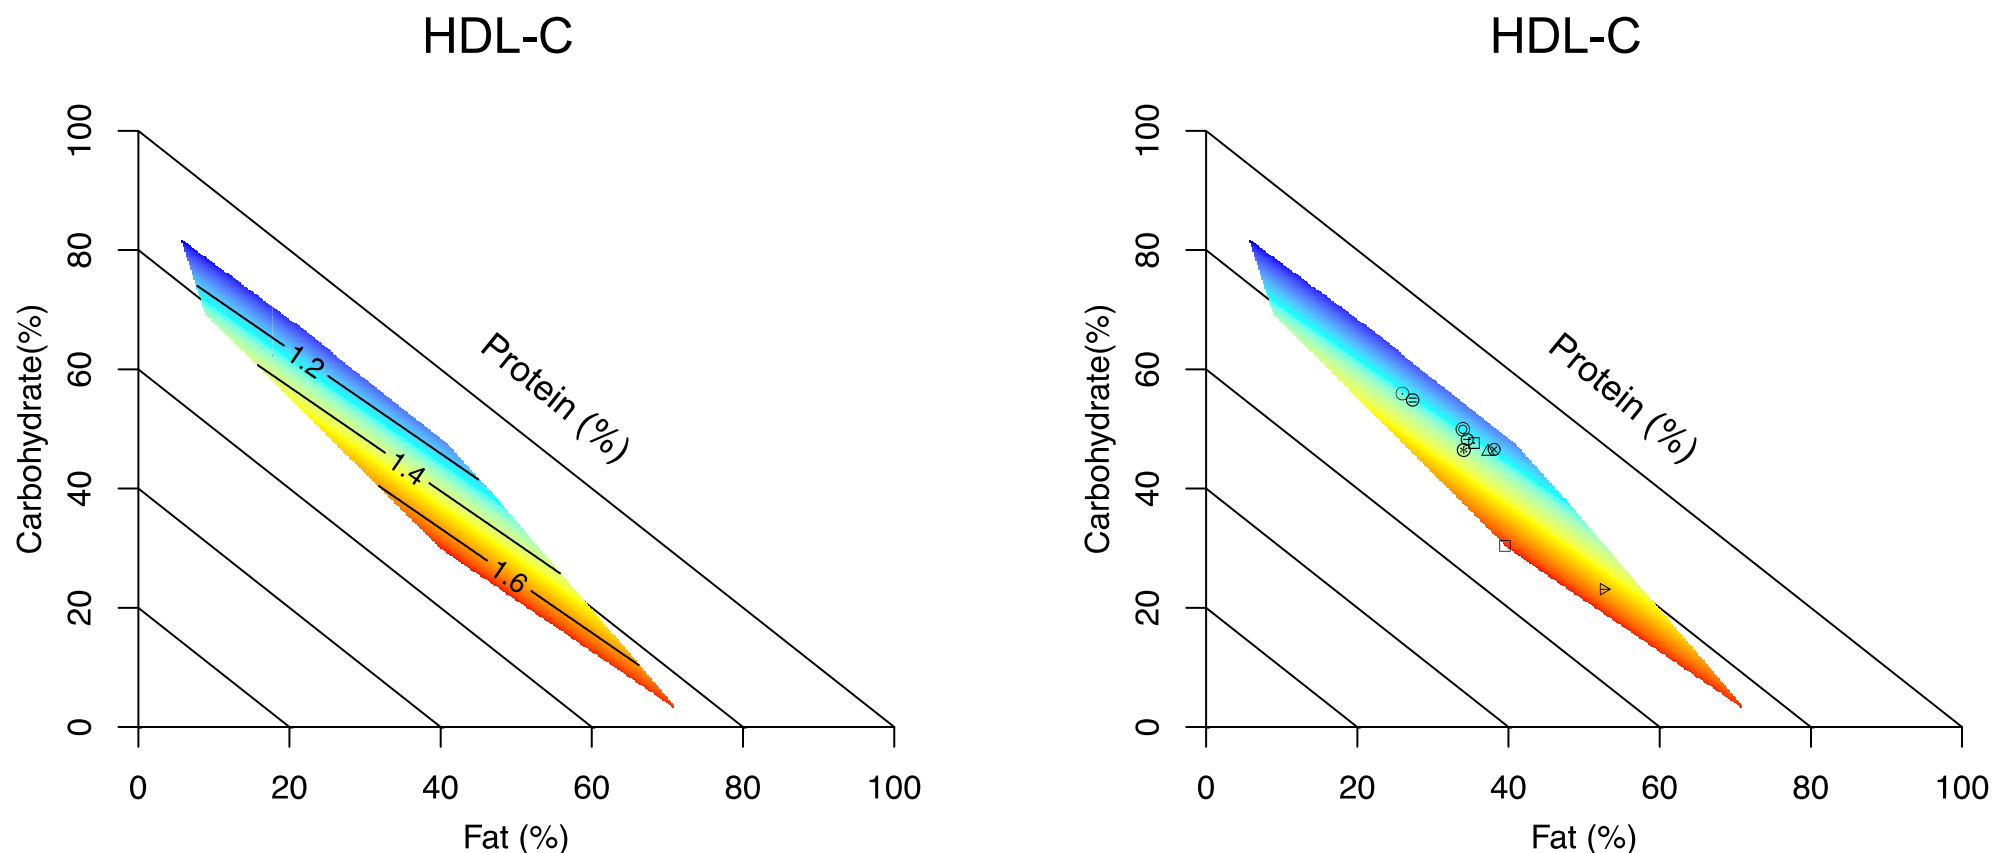

Δ = Mediterranean diet; ⊙ = Dietary Approaches to Stop Hypertension; □ = Paleo diet; ⊠ = Dietary guidelines-based diets; ⊖ = low GI / GL diet; ⊕ = plant-based diets; ⊗ = low fat diet; ⊢ = low carbohydrate high fat diet; ⊕ = high GI / GL diet; ⊗ = western habitual diet

The symbols on the response surfaces correspond to the average macronutrient composition of each dietary pattern.

<sup>1</sup>Response surfaces with contour lines show the predicted effects superimposed onto a composition triangle for HDL-c (mmol/L). Each space on these RMTs represents 100% of dietary energy, being the sum of the x-axis (fat), the y-axis (carbohydrate), and an inferred z-axis (protein). A diagonal line closer to the origin corresponds to higher intake. The distribution of the surface limited to the intakes observed in the included dietary studies.

**Supplementary Figure S39.** Right-angle Mixture Triangles (RMTs) for ApoA1<sup>1</sup>

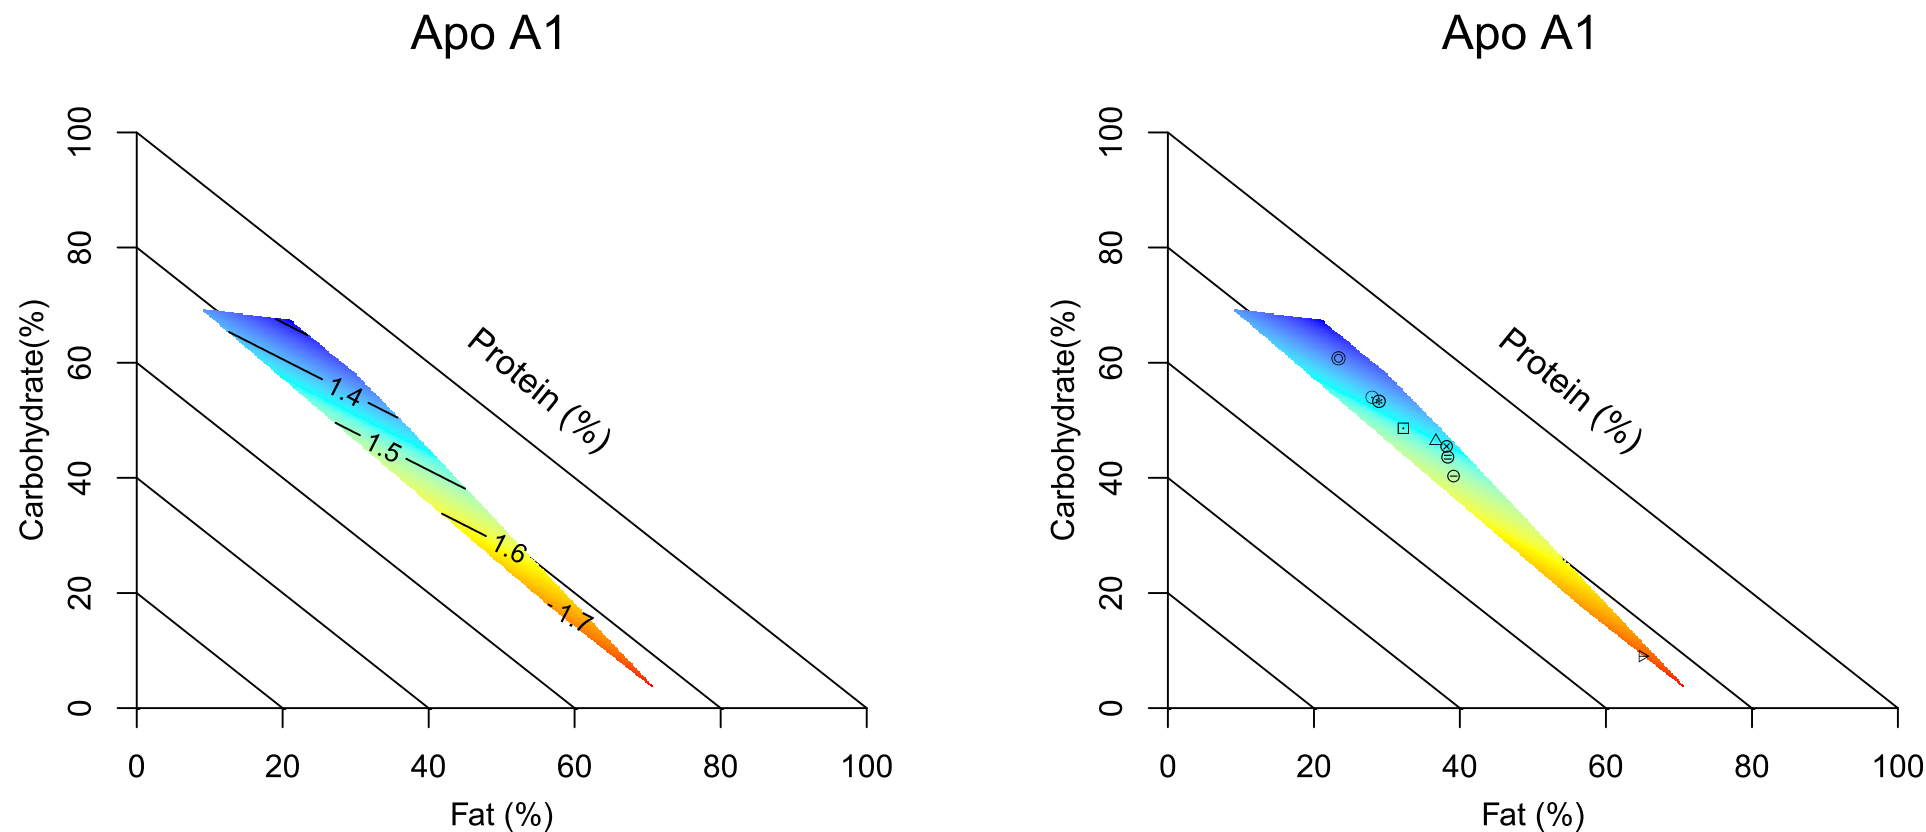

Δ = Mediterranean diet; ⊙ = Dietary Approaches to Stop Hypertension; ◻ = Dietary guidelines-based diets; ⊖ = low GI / GL diet; ⊗ = plant-based diets; ⊕ = low fat diet; ⊲ = low carbohydrate high fat diet; ⊕ = high GI / GL diet; ⊗ = western habitual diet

The symbols on the response surfaces correspond to the average macronutrient composition of each dietary pattern.

<sup>1</sup>Response surfaces with contour lines show the predicted effects superimposed onto a composition triangle for ApoA1 (g/L). Each space on these RMTs represents 100% of dietary energy, being the sum of the x-axis (fat), the y-axis (carbohydrate), and an inferred z-axis (protein). A diagonal line closer to the origin corresponds to higher intake. The distribution of the surface limited to the intakes observed in the included dietary studies.

**Supplementary Table S68.** Coefficients for macronutrient and total cholesterol, HDL-c and ApoA1 Right-angle Mixture Triangles<sup>1</sup>

| Total cholesterol: Model 2 | Estimate | Standard Error | t-value | p-value |
|----------------------------|----------|----------------|---------|---------|
| % Protein                  | 7.7451   | 2.2622         | 3.4236  | 0.0009  |
| % Carbohydrate             | 3.3866   | 0.4866         | 6.9603  | <0.0001 |
| % Fat                      | 5.2888   | 0.9021         | 5.8625  | <0.0001 |
| HDL-c: Model 2             | Estimate | Standard Error | t-value | p-value |
| % Protein                  | 3.7677   | 0.6088         | 6.1884  | <0.0001 |
| % Carbohydrate             | 0.5904   | 0.131          | 4.5069  | <0.0001 |
| % Fat                      | 0.9922   | 0.2459         | 4.0344  | 0.0001  |
| ApoA1: Model 2             | Estimate | Standard Error | t-value | p-value |
| % Protein                  | 2.5522   | 0.6504         | 3.9241  | 0.0004  |
| % Carbohydrate             | 0.9847   | 0.1278         | 7.7061  | <0.0001 |
| % Fat                      | 1.5414   | 0.2421         | 6.3668  | <0.0001 |

<sup>1</sup>Model 2 represents linear associations between macronutrient composition and biomarker outcomes.

## eReferences

1. Abedi P, Lee MHS, Kandiah M, et al. (2010) Diet intervention to improve cardiovascular risk factors among Iranian postmenopausal women. *Nutrition research and practice* 4(6):522–7. doi:10.4162/nrp.2010.4.6.522
2. Adamsson V, Reumark A, Fredriksson IB, et al. (2010) Effects of a healthy Nordic diet on cardiovascular risk factors in hypercholesterolaemic subjects: a randomized controlled trial (NORDIET). *Journal of internal medicine* 269(2):150–9. doi:10.1111/j.1365-2796.2010.02290.x
3. Ambring A, Johansson M, Axelsen M, Gan L, Strandvik B, Friberg P (2006) Mediterranean-inspired diet lowers the ratio of serum phospholipid *n*-6 to *n*-3 fatty acids, the number of leukocytes and platelets, and vascular endothelial growth factor in healthy subjects. *American Journal of Clinical Nutrition* 83(3):575–81.
4. Blomquist C, Alvehus M, Buren J, et al. (2017) Attenuated Low-Grade Inflammation Following Long-Term Dietary Intervention in Postmenopausal Women with Obesity. *Obesity (Silver Spring)* 25(5):892–900. doi:10.1002/oby.21815
5. Bos MB, de Vries JHM, Feskens EJM, et al. (2010) Effect of a high monounsaturated fatty acids diet and a Mediterranean diet on serum lipids and insulin sensitivity in adults with mild abdominal obesity. *Nutrition, metabolism, and cardiovascular diseases* 20(8):591–8. doi:10.1016/j.numecd.2009.05.008
6. Botero D, Ebbeling CB, Blumberg JB, et al. (2009) Acute effects of dietary glycemic index on antioxidant capacity in a nutrient-controlled feeding study. *Obesity (Silver Spring)* 17(9):1664–70. doi:https://dx.doi.org/10.1038/oby.2009.203
7. Bouché C, Rizkalla SW, Luo J, et al. (2002) Five-Week, Low-Glycemic Index Diet Decreases Total Fat Mass and Improves Plasma Lipid Profile in Moderately Overweight Nondiabetic Men. *Diabetes Care* 25(5):822–8. doi:10.2337/diacare.25.5.822
8. Bravo-Herrera MD, López-Miranda J, Marín C, et al. (2004) Tissue factor expression is decreased in monocytes obtained from blood during Mediterranean or high carbohydrate diets. *Nutrition, metabolism, and cardiovascular diseases* 14(3):128–32. doi:10.1016/S0939-4753(04)80032-2
9. Brynes AE, Edwards CM, Ghatel MA, et al. (2003) A randomised four-intervention crossover study investigating the effect of carbohydrates on daytime profiles of insulin, glucose, non-esterified fatty acids and triacylglycerols in middle-aged men. *British Journal of Nutrition* 89(2):207–18. doi:http://dx.doi.org/10.1079/BJN2002769
10. Casas R, Sacanella E, Urpi-Sarda M, et al. (2014) The effects of the Mediterranean diet on biomarkers of vascular wall inflammation and plaque vulnerability in subjects with high risk for cardiovascular disease. A randomized trial. *Plos one* 9(6).
11. Casas R, Sacanella E, Urpi-Sarda M, et al. (2016) Long-term immunomodulatory effects of a mediterranean diet in adults at high risk of cardiovascular disease in the prevencion con dieta mediterranea (predimed) randomized controlled trial. *Journal of Nutrition* 146(9):1684–93. doi:http://dx.doi.org/10.3945/jn.115.229476
12. Casas R, Urpi-Sarda M, Sacanella E, et al. (2017) Anti-Inflammatory Effects of the Mediterranean Diet in the Early and Late Stages of Atheroma Plaque Development. *Mediators of Inflammation* 2017(3674390). doi:http://dx.doi.org/10.1155/2017/3674390
13. Chen ST, Maruthur NM, Appel LJ (2010) The effect of dietary patterns on estimated coronary heart disease risk: results from the Dietary Approaches to Stop Hypertension (DASH) trial. *Circ Cardiovasc Qual Outcomes* 3(5):484–9. doi:10.1161/CIRCOUTCOMES.109.930685
14. Clapp JF, Lopez B (2007) Low-versus high-glycemic index diets in women: effects on caloric requirement, substrate utilization and insulin sensitivity. *Metabolic syndrome and related disorders* 5(3):231–42. doi:10.1089/met.2006.0040
15. Cooper RS, Goldberg RB, Trevisan M, et al. (1982) The selective lipid-lowering effect of vegetarianism on low density lipoproteins in a cross-over experiment. *Atherosclerosis* 44(3):293–305. doi:10.1016/0021-9150(82)90004-1
16. Dansinger ML, Gleason JA, Griffith JL, Selker HP, Schaefer EJ (2005) Comparison of the Atkins, Ornish, Weight Watchers, and Zone Diets for Weight Loss and Heart Disease Risk Reduction: A Randomized Trial. *JAMA : the journal of the American Medical Association* 293(1):43–53. doi:10.1001/jama.293.1.43
17. Davis CR, Bryan J, Hodgson JM, Woodman R, Murphy KJ (2017) A Mediterranean diet reduces F2-Isoprostanes and triglycerides among older Australian men and women after 6 months. *Journal of Nutrition* 147(7):1348–55. doi:http://dx.doi.org/10.3945/jn.117.248419
18. de Rougemont A, Normand S, Nazare J-A, et al. (2007) Beneficial effects of a 5-week low-glycaemic index regimen on weight control and cardiovascular risk factors in overweight non-diabetic subjects. *British journal of nutrition* 98(6):1288–98. doi:10.1017/S0007114507778674
19. Djuric Z, Ren J, Blythe J, VanLoon G, Sen A (2009) A Mediterranean dietary intervention in healthy American women changes plasma carotenoids and fatty acids in distinct clusters. *Nutrition research (New York, n.Y.)* 29(3):156–63. doi:10.1016/j.nutres.2009.03.001

20. Due A, Larsen TM, Huiling MU, Hermansen K, Stender S, Astrup A (2008) Comparison of 3 ad libitum diets for weight-loss maintenance, risk of cardiovascular disease, and diabetes : a 6-mo randomized, controlled trial. *The American journal of clinical nutrition* 88(5):1232-41.
21. Fernández-Real JM, Bulló M, Moreno-Navarrete JM, et al. (2012) A mediterranean diet enriched with olive oil is associated with higher serum total osteocalcin levels in elderly men at high cardiovascular risk. *Journal of Clinical Endocrinology & Metabolism* 97(10):3792-8. doi:10.1210/jc.2012-2221
22. Fuentes F, Lopez-Miranda J, Perez-Martinez P, et al. (2008) Chronic effects of a high-fat diet enriched with virgin olive oil and a low-fat diet enriched with alpha-linolenic acid on postprandial endothelial function in healthy men. *British Journal of Nutrition* 100(1):159-65. doi:http://dx.doi.org/10.1017/S0007114508888708
23. Gardner CD, Coulston A, Chatterjee L, Rigby A, Spiller G, Farquhar JW (2005) The effect of a plant-based diet on plasma lipids in hypercholesterolemic adults : A randomized trial. *Ann Intern Med* 142(9):725-33. doi:10.7326/0003-4819-142-9-200505030-00007
24. Gardner CD, Kiazand A, Alhassan S, et al. (2007) Comparison of the Atkins, Zone, Ornish, and LEARN Diets for Change in Weight and Related Risk Factors Among Overweight Premenopausal Women: The A TO Z Weight Loss Study: A Randomized Trial. *JAMA : the journal of the American Medical Association* 297(9):969-77. doi:10.1001/jama.297.9.969
25. Genoni A, Lyons-Wall P, Lo J, Devine A (2016) Cardiovascular, Metabolic Effects and Dietary Composition of Ad-Libitum Paleolithic vs. Australian Guide to Healthy Eating Diets: A 4-Week Randomised Trial. *Nutrients* 8(5):23. doi:https://dx.doi.org/10.3390/nu8050314
26. Hinderliter AL, Hinderliter AL, Babyak MA, et al. (2011) The DASH Diet and Insulin Sensitivity. *Current hypertension reports* 13(1):67-73. doi:10.1007/s11906-010-0168-5
27. Howard BV, Van Horn L, Hsia J, et al. (2006) Low-Fat Dietary Pattern and Risk of Cardiovascular Disease: The Women's Health Initiative Randomized Controlled Dietary Modification Trial. *JAMA : the journal of the American Medical Association* 295(6):655-66. doi:10.1001/jama.295.6.655
28. Hunt JR, Matthys LA, Johnson LK (1998) Zinc absorption, mineral balance, and blood lipids in women consuming controlled lactoovovegetarian and omnivorous diets for 8 wk. *American Journal of Clinical Nutrition* 67:421-30.
29. Hunt JR, Roughead ZK (1999) Nonheme-iron absorption, fecal ferritin excretion, and blood indexes of iron status in women consuming controlled lactoovovegetarian diets for 8 wk. *The American journal of clinical nutrition* 69(5):944-52.
30. Jenkins DJA, Wolever TMS, Collier GR, et al. (1987) Metabolic effects of a low-glycemic-index diet. *The American journal of clinical nutrition* 46(6):968-75. doi:10.1093/ajcn/46.6.968
31. Jensen L, Sloth B, Krog-Mikkelsen I, et al. (2008) A low-glycemic-index diet reduces plasma plasminogen activator inhibitor-1 activity, but not tissue inhibitor of proteinases-1 or plasminogen activator inhibitor-1 protein, in overweight women. *The American journal of clinical nutrition* 87(1):97-105. doi:10.1093/ajcn/87.1.97
32. Kahleova H, Dort S, Holubkov R, Barnard ND (2018) A Plant-Based High-Carbohydrate, Low-Fat Diet in Overweight Individuals in a 16-Week Randomized Clinical Trial: The Role of Carbohydrates. *Nutrients* 10(9):1302. doi:10.3390/nu10091302
33. Kestin M, Rouse IL, Correll RA, Nestel PJ (1989) Cardiovascular disease risk factors in free-living men: Comparison of two prudent diets, one based on lactoovovegetarianism and the other allowing lean meat. *The American journal of clinical nutrition* 50(2):280-7. doi:10.1093/ajcn/50.2.280
34. Kim Y, Keogh JB, Clifton PM (2017) Effects of Two Different Dietary Patterns on Inflammatory Markers, Advanced Glycation End Products and Lipids in Subjects without Type 2 Diabetes: A Randomised Crossover Study. *Nutrients* 9(4):29. doi:https://dx.doi.org/10.3390/nu9040336
35. Konstantinidou V, Covas MI, Munoz-Aguayo D, et al. (2010) In vivo nutrigenomic effects of virgin olive oil polyphenols within the frame of the Mediterranean diet: a randomized controlled trial. *FASEB J* 24(7):2546-57. doi:10.1096/fj.09-148452
36. Ling WH, Laitinen M, Hänninen O (1992) Shifting from conventional diet to an uncooked vegan diet reversibly alters serum lipid and apolipoprotein levels. *Nutrition research (New York, n.Y.)* 12(12):1431-40. doi:10.1016/S0271-5317(05)80185-X
37. Marin C, Ramirez R, Delgado-Lista J, et al. (2011) Mediterranean diet reduces endothelial damage and improves the regenerative capacity of endothelium. *American Journal of Clinical Nutrition* 93(2):267-74. doi:10.3945/ajcn.110.006866
38. Mellberg C, Sandberg S, Ryberg M, et al. (2014) Long-term effects of a Palaeolithic-type diet in obese postmenopausal women: a 2-year randomized trial. *Eur J Clin Nutr* 68(3):350-7. doi:10.1038/ejcn.2013.290
39. Meslier V, Laiola M, Roager HM, et al. (2020) Mediterranean diet intervention in overweight and obese subjects lowers plasma cholesterol and causes changes in the gut microbiome and metabolome independently of energy intake. *Gut* 69(7):1258-68. doi:http://dx.doi.org/10.1136/gutjnl-2019-320438

40. Miller ER, 3rd, Erlinger TP, Sacks FM, et al. (2005) A dietary pattern that lowers oxidative stress increases antibodies to oxidized LDL: results from a randomized controlled feeding study. *Atherosclerosis* 183(1):175–82.
41. Miller M, Beach V, Sorkin JD, et al. (2009) Comparative effects of three popular diets on lipids, endothelial function, and C-reactive protein during weight maintenance. *J Am Diet Assoc* 109(4):713–7. doi:10.1016/j.jada.2008.12.023
42. Mishra S, Xu J, Agarwal U, Gonzales J, Levin S, Barnard ND (2013) A multicenter randomized controlled trial of a plant-based nutrition program to reduce body weight and cardiovascular risk in the corporate setting: the GEICO study. *European journal of clinical nutrition* 67(7):718–24. doi:10.1038/ejcn.2013.92
43. Mohammadshahi M, Haidari F, Karandish M, Ebrahimi S, Haghighizadeh MH (2014) A randomized clinical trial of nutrition education for improvement of diet quality and inflammation in Iranian obese women. *J Nutr Metab* 2014:605782. doi:https://dx.doi.org/10.1155/2014/605782
44. Morgantini C, Trifiro S, Trico D, et al. (2018) A short-term increase in dietary cholesterol and fat intake affects high-density lipoprotein composition in healthy subjects. *Nutrition, metabolism, and cardiovascular diseases : NMCD* 28(6):575–81. doi:https://dx.doi.org/10.1016/j.numecd.2018.03.005
45. Neuhouwer ML, Schwarz Y, Wang C, et al. (2012) A low-glycemic load diet reduces serum C-reactive protein and modestly increases adiponectin in overweight and obese adults. *Journal of Nutrition* 142(2):369–74. doi:10.3945/jn.111.149807
46. Nowson CA, Worsley A, Margerison C, Jorna MK, Godfrey SJ, Booth A (2005) Blood pressure change with weight loss is affected by diet type in men. *The American journal of clinical nutrition* 81(9):983–9.
47. Paniagua JA, Sacristana AGdl, Sanchez E, et al. (2007) A Mufa-Rich Diet Improves Postprandial Glucose, Lipid and Glp-1 Responses in Insulin-Resistant Subjects. *Journal of the American College of Nutrition* 26(5):434–44.
48. Pérez-Jiménez F, López-Miranda J, Pinillos MD, et al. (2001) A Mediterranean and a high-carbohydrate diet improve glucose metabolism in healthy young persons. *Diabetologia* 44(11):2038–43. doi:10.1007/s001250100009
49. Perez-Martinez P, Lopez-Miranda J, Blanco-Colio L, et al. (2006) The chronic intake of a Mediterranean diet enriched in virgin olive oil, decreases nuclear transcription factor  $\kappa$ B activation in peripheral blood mononuclear cells from healthy men. *Atherosclerosis* 194(2):e141–e6. doi:10.1016/j.atherosclerosis.2006.11.033
50. Poulsen SK, Due A, Jordy AB, et al. (2014) Health effect of the New Nordic Diet in adults with increased waist circumference: a 6-mo randomized controlled trial. *The American journal of clinical nutrition* 99(1):35–45. doi:10.3945/ajcn.113.069393
51. Rallidis LS, Lekakis J, Kolomvotsou A, et al. (2009) Close adherence to a Mediterranean diet improves endothelial function in subjects with abdominal obesity. *The American journal of clinical nutrition* 90(2):263–8. doi:10.3945/ajcn.2008.27290
52. Rallidis LS, Kolomvotsou A, Lekakis J, et al. (2017) Short-term effects of Mediterranean-type diet intervention on soluble cellular adhesion molecules in subjects with abdominal obesity. *Clin Nutr ESPEN* 17:38–43. doi:https://dx.doi.org/10.1016/j.clnesp.2016.11.002
53. Reidlinger DP, Darzi J, Hall WL, et al. (2015) How effective are current dietary guidelines for cardiovascular disease prevention in healthy middle-aged and older men and women? A randomized controlled trial. *American Journal of Clinical Nutrition* 101(5):922–30. doi:http://dx.doi.org/10.3945/ajcn.114.097352
54. Retterstol K, Svendsen M, Narverud I, Holven KB (2018) Effect of low carbohydrate high fat diet on LDL cholesterol and gene expression in normal-weight, young adults: A randomized controlled study. *Atherosclerosis* 279:52–61. doi:https://dx.doi.org/10.1016/j.atherosclerosis.2018.10.013
55. Roussell MA, Hill AM, Gaugler TL, et al. (2012) Beef in an Optimal Lean Diet study: effects on lipids, lipoproteins, and apolipoproteins. *The American journal of clinical nutrition* 95(1):9–16. doi:10.3945/ajcn.111.016261
56. Sacks FM, Carey VJ, Anderson CAM, et al. (2014) Effects of High vs Low Glycemic Index of Dietary Carbohydrate on Cardiovascular Disease Risk Factors and Insulin Sensitivity: The OmniCarb Randomized Clinical Trial. *JAMA : the journal of the American Medical Association* 312(23):2531–41. doi:10.1001/jama.2014.16658
57. Santiago-Torres M, Kratz M, Lampe JW, et al. (2016) Metabolic responses to a traditional Mexican diet compared with a commonly consumed US diet in women of Mexican descent: A randomized crossover feeding trial. *American Journal of Clinical Nutrition* 103(2):366–74. doi:http://dx.doi.org/10.3945/ajcn.115.119016
58. Shikany JM, Phadke RP, Redden DT, Gower BA (2009) Effects of low- and high-glycemic index/glycemic load diets on coronary heart disease risk factors in overweight/obese men. *Metabolism, clinical and experimental* 58(12):1793–801. doi:10.1016/j.metabol.2009.06.006

59. Singh RB, Dubnov G, Niaz MA, et al. (2002) Effect of an Indo-Mediterranean diet on progression of coronary artery disease in high risk patients (Indo-Mediterranean Diet Heart Study): a randomised single-blind trial. *The Lancet* 360(9344):1455–61. doi:10.1016/s0140-6736(02)11472-3
60. Stomby A, Simonyte K, Mellberg C, et al. (2015) Diet-induced weight loss has chronic tissue-specific effects on glucocorticoid metabolism in overweight postmenopausal women. *Int J Obes (Lond)* 39(5):814–9. doi:10.1038/ijo.2014.188
61. Tuomainen M, Karkkainen O, Leppanen J, et al. (2019) Quantitative assessment of betainized compounds and associations with dietary and metabolic biomarkers in the randomized study of the healthy Nordic diet (SYSDIET). *The American journal of clinical nutrition* 110(5):1108–18. doi:https://dx.doi.org/10.1093/ajcn/nqz179
62. Uusitupa M, Hermansen K, Savolainen MJ, et al. (2013) Effects of an isocaloric healthy Nordic diet on insulin sensitivity, lipid profile and inflammation markers in metabolic syndrome – a randomized study (SYSDIET). *Journal of internal medicine* 274(1):52–66. doi:10.1111/joim.12044
63. Vincent-Baudry S, Defoort C, Vague P, et al. (2005) The Medi-RIVAGE study : reduction of cardiovascular disease risk factors after a 3-mo intervention with a Mediterranean-type diet or a low-fat diet. *The American journal of clinical nutrition* 82(5):964–71. doi:10.1093/ajcn/82.5.964
64. Vitale M, Giacco R, Laiola M, et al. (2021) Acute and chronic improvement in postprandial glucose metabolism by a diet resembling the traditional Mediterranean dietary pattern: can SCFAs play a role? *Clinical nutrition (Edinburgh, Scotland)* 40(2):428–37.
65. Wade AT, Davis CR, Dyer KA, Hodgson JM, Woodman RJ, Murphy KJ (2018) A Mediterranean diet supplemented with dairy foods improves markers of cardiovascular risk: results from the MedDairy randomized controlled trial. *The American journal of clinical nutrition* 108(6):1166–82. doi:https://dx.doi.org/10.1093/ajcn/nqy207
66. Wade AT, Davis CR, Dyer KA, Hodgson JM, Woodman RJ, Murphy KJ (2019) Effects of Mediterranean diet supplemented with lean pork on blood pressure and markers of cardiovascular risk: findings from the MedPork trial. *The British journal of nutrition* 122(8):873–83. doi:https://dx.doi.org/10.1017/S0007114519001168
67. Wardle J, Rogers P, Judd P, et al. (2000) Randomized Trial of the Effects of Cholesterol- lowering Dietary Treatment on Psychological Function. *The American journal of medicine* 108:547–53.
68. Wright n, Wilson L, Smith M, Duncan B, McHugh P (2017) The BROAD study: A randomised controlled trial using a whole food plant-based diet in the community for obesity, ischaemic heart disease or diabetes. *Nutr Diabetes* 7(3):e256. doi:10.1038/nutd.2017.3
69. Juraschek SP, Kovell LC, Appel LJ, et al. (2020) Associations Between Dietary Patterns and Subclinical Cardiac Injury: An Observational Analysis From the DASH Trial. *Ann Intern Med* 172(12):786–94. doi:http://dx.doi.org/10.7326/M20-0336
70. Marckmann P, Sandstrom B, Jespersen J (1994) Low-fat, high-fiber diet favorably affects several independent risk markers of ischemic heart disease: observations on blood lipids, coagulation, and fibrinolysis from a trial of middle-aged. *American Journal of Clinical Nutrition* 59(9):935–9.
71. Runchey SS, Pollak MN, Valsta LM, et al. (2012) Glycemic load effect on fasting and post-prandial serum glucose, insulin, IGF-1 and IGFBP-3 in a randomized, controlled feeding study. *European Journal of Clinical Nutrition* 66(10):1146–52. doi:10.1038/ejcn.2012.107
72. Tinker LF, Bonds DE, Margolis KL, et al. (2008) Low-Fat Dietary Pattern and Risk of Treated Diabetes Mellitus in Postmenopausal Women: The Women's Health Initiative Randomized Controlled Dietary Modification Trial. *Arch Intern Med* 168(14):1500–11. doi:10.1001/archinte.168.14.1500.
